# Supplementary material for: Genetic Dissection of Early Blight Resistance in Tetraploid Potato
Source: Front Plant Sci. 2022 Mar 25;13:851538. doi: 10.3389/fpls.2022.851538 (PMC8990756; doi:10.3389/fpls.2022.851538)
Supplement: Supplementary file 7 [file Table_1.XLSX]

## Sheet: Studentized residual 
Supplementary Table 1. Maturity corrected regression analysis between maturity and rAUDPC among full-sib population in 2018.
Genotype	Studentized residual*
ind_1	1.9495
ind_2	-0.786791
ind_3	0.817685
ind_4	-0.0548734
ind_5	0.431543
ind_6	1.46842
ind_7	1.78986
ind_8	2.84654
ind_9	-0.217939
ind_10	-0.166677
ind_11	2.23941
ind_12	0.607983
ind_13	0.956455
ind_14	0.160766
ind_15	-0.942857
ind_16	-0.544412
ind_17	-0.897565
ind_18	1.17075
ind_20	-0.732643
ind_21	0.140929
ind_22	-0.273774
ind_23	-0.493272
ind_24	-0.479654
ind_25	0.847868
ind_26	-0.375954
ind_27	0.576454
ind_28	0.524372
ind_29	-0.2886
ind_30	-1.02311
ind_31	0.336473
ind_32	-0.303527
ind_33	-0.213982
ind_34	1.01751
ind_35	3.27719
ind_36	0.686651
ind_37	-0.547526
ind_39	0.180393
ind_40	-0.856551
ind_41	-1.3071
ind_42	-0.607642
ind_43	-0.639769
ind_44	0.0499815
ind_45	-0.355055
ind_46	-0.427987
ind_47	0.0233161
ind_48	2.83672
ind_49	-0.664982
ind_50	-0.405371
ind_51	-0.854056
ind_54	-0.52272
ind_55	-0.718912
ind_56	-0.932877
ind_57	-0.863358
ind_58	2.27067
ind_60	-0.685868
ind_61	-0.0792993
ind_62	1.24524
ind_63	-0.204052
ind_64	-0.881433
ind_65	-0.342653
ind_66	-1.36531
ind_67	-0.48256
ind_68	1.56918
ind_69	1.42378
ind_70	-0.498959
ind_71	-1.37475
ind_72	-0.629764
ind_73	1.3187
ind_74	-0.509985
ind_75	1.29631
ind_77	-0.00576587
ind_78	-0.689875
ind_79	-0.364985
ind_80	0.15549
ind_81	-0.140656
ind_82	-0.417118
ind_83	2.98238
ind_84	-1.49485
ind_85	0.707044
ind_86	-0.213171
ind_87	-0.819202
ind_88	-0.693039
ind_89	0.668379
ind_90	1.721
ind_91	-0.765876
ind_92	-0.52548
ind_93	0.125022
ind_94	0.557627
ind_95	-0.0915476
ind_96	-0.937388
ind_97	0.440213
ind_98	0.809741
ind_99	-1.25075
ind_100	-0.472406
ind_101	0.427786
ind_102	1.72193
ind_103	0.36628
ind_104	0.755001
ind_105	-0.78673
ind_106	-0.191444
ind_107	-0.348238
ind_108	0.997661
ind_109	-1.024
ind_110	-0.261465
ind_111	0.00235656
ind_112	0.884985
ind_113	-0.845618
ind_114	-0.77895
ind_115	-0.943006
ind_116	-0.138791
ind_117	-1.3782
ind_118	-0.731907
ind_119	1.98162
ind_120	-1.05634
ind_121	0.30523
ind_122	1.2699
ind_123	-0.556583
ind_124	-1.09326
ind_125	-0.305762
ind_126	-0.17174
ind_127	0.142388
ind_128	-0.358762
ind_129	-0.968257
ind_132	2.03551
ind_133	0.154559
ind_134	1.98578
ind_136	1.31012
ind_137	1.05641
ind_138	-0.114789
ind_139	0.417984
ind_141	-0.935839
ind_142	-1.02408
ind_143	-0.94005
ind_144	0.907752
ind_145	-0.952215
ind_146	1.02249
ind_147	0.543399
ind_149	-1.06106
ind_150	0.446756
ind_151	-0.322794
ind_152	1.14972
ind_153	1.61986
ind_154	-1.2868
ind_155	-1.0009
ind_156	-0.782063
ind_157	-0.100093
ind_158	-1.08848
ind_159	-0.151259
ind_160	0.586311
ind_161	-0.122419
ind_162	-0.431726
ind_163	2.04408
ind_164	-0.224588
ind_165	-0.18233
ind_166	0.289894
ind_167	1.46854
ind_168	0.768663
ind_169	-0.260043
ind_170	-0.767436
ind_171	0.0454925
ind_172	-0.552487
ind_173	-0.922548
ind_174	-0.0738276
ind_175	-0.0976445
ind_176	0.912626
ind_177	-0.278825
ind_178	-1.18656
ind_179	-0.168632
ind_180	1.04614
ind_181	-1.35964
ind_182	-1.35807
ind_183	3.13947
ind_184	-0.380677
ind_185	0.101348
ind_186	-0.00473076
ind_187	0.248937
ind_188	-0.856294
ind_190	0.494246
ind_191	0.0865386
ind_192	-0.80842
ind_194	-0.781121
ind_195	2.71313
ind_196	0.854835
ind_198	0.0403622
ind_199	-0.947652
ind_200	-0.31787
ind_201	-0.942033
ind_202	0.206421
ind_203	1.69606
ind_204	-0.36017
ind_205	-0.134029
ind_206	0.986848
ind_208	-0.843201
ind_209	-0.00266081
ind_210	1.78085
ind_211	-0.966807
ind_212	1.10457
ind_213	-0.191858
ind_214	-0.925519
ind_215	-0.622969
ind_216	-0.711436
ind_217	-0.996989
ind_218	-1.25047
ind_219	0.902126
ind_220	-1.58446
ind_221	-0.727547
ind_222	-0.251878
ind_223	-1.15839
ind_224	-0.354066
ind_225	-0.765087
ind_226	0.637333
ind_227	-0.66569
ind_228	1.57296
ind_229	-0.863776
ind_230	1.40508
ind_231	-1.85951
ind_232	0.675055
ind_233	-0.915547
ind_234	-1.12517
ind_235	-1.92064
ind_236	-1.09582
ind_237	0.149521
ind_238	-0.824386
ind_239	0.910248
ind_240	-0.181066
ind_241	-0.256402
ind_242	-0.383503
*If the value is smaller than -3.59, it indicated that the clone is significent more resistant than based on maturity; if the valuse is larger than 3.59, it indicated that the clone is significent suscepitable than based on maturity.
