# Supplementary material for: Genetic Dissection of Early Blight Resistance in Tetraploid Potato
Source: Front Plant Sci. 2022 Mar 25;13:851538. doi: 10.3389/fpls.2022.851538 (PMC8990756; doi:10.3389/fpls.2022.851538)
Supplement: Supplementary file 8 [file Table_2.XLSX]

## Sheet: Studentized residual 
Supplemental Table 2. Maturity corrected regression analysis between maturity and rAUDPC among full-sib population in 2019.
Genotype	Studentized residual*
ind_1	0.244
ind_2	-0.410711
ind_3	2.72116
ind_4	-0.0933861
ind_5	1.86962
ind_6	0.0671493
ind_7	2.24014
ind_8	0.0197406
ind_9	0.331739
ind_10	-1.24798
ind_11	-0.0536609
ind_12	-1.20215
ind_13	1.74902
ind_14	-0.407062
ind_15	-1.53926
ind_16	0.187314
ind_17	-2.2068
ind_18	0.00796454
ind_19	-0.664752
ind_20	1.03699
ind_21	-0.405402
ind_22	0.517639
ind_23	-0.195111
ind_24	-0.493883
ind_25	0.368648
ind_26	-0.0360138
ind_27	0.247784
ind_28	0.0121529
ind_29	1.18979
ind_30	-0.97613
ind_31	-1.15484
ind_32	-0.485205
ind_33	-0.0742523
ind_34	-0.245519
ind_35	0.0259691
ind_36	0.323435
ind_37	-0.847365
ind_38	-1.17683
ind_39	1.02722
ind_40	0.474658
ind_41	-1.17551
ind_42	-0.680392
ind_43	-0.41018
ind_44	-0.093413
ind_45	-0.273045
ind_46	-0.214042
ind_47	-0.13513
ind_48	0.295929
ind_49	-0.00813956
ind_50	1.39384
ind_51	0.188964
ind_54	0.89753
ind_55	-0.470586
ind_56	0.388839
ind_57	0.0567761
ind_58	2.40173
ind_59	0.848907
ind_60	-0.887064
ind_61	2.12747
ind_62	0.222767
ind_63	-0.123032
ind_64	-0.878273
ind_65	0.211354
ind_66	-0.861313
ind_67	-0.401297
ind_68	2.27823
ind_69	1.1639
ind_70	-1.4824
ind_71	-0.95753
ind_72	-0.472019
ind_73	-0.694545
ind_74	0.513483
ind_75	-1.27827
ind_77	-1.13564
ind_78	1.14729
ind_79	-0.0349667
ind_80	-0.887
ind_81	-0.542829
ind_82	1.13207
ind_83	2.26206
ind_84	0.859846
ind_85	-0.216966
ind_86	-0.070574
ind_87	0.280721
ind_88	-0.535538
ind_89	1.43175
ind_90	-1.62334
ind_91	0.479032
ind_92	0.445699
ind_93	0.991436
ind_94	0.858547
ind_95	-0.986394
ind_96	-0.619612
ind_97	0.734815
ind_98	1.21339
ind_99	-1.36362
ind_100	1.80917
ind_101	1.82678
ind_102	0.94795
ind_103	0.585183
ind_104	-0.501657
ind_105	-0.500617
ind_106	0.672326
ind_107	-0.906427
ind_108	2.32867
ind_109	-1.42246
ind_110	0.694445
ind_111	0.669931
ind_112	1.03843
ind_113	-0.727325
ind_114	-0.0241335
ind_115	-0.0036818
ind_116	-0.345051
ind_117	0.216884
ind_118	0.453867
ind_119	2.46094
ind_120	0.380095
ind_121	1.92271
ind_122	0.0188893
ind_123	0.105531
ind_124	-1.62774
ind_125	-0.118738
ind_126	-0.746104
ind_127	-0.864721
ind_128	2.08465
ind_129	-1.72078
ind_132	-0.607757
ind_133	0.283465
ind_134	1.24697
ind_135	-0.279515
ind_136	1.14821
ind_137	1.64996
ind_138	0.138089
ind_139	0.042459
ind_141	-0.246244
ind_142	-1.76643
ind_143	-0.955458
ind_144	-2.00751
ind_145	-0.34371
ind_146	-0.407587
ind_147	-0.383161
ind_149	0.323296
ind_150	1.24244
ind_151	-0.977376
ind_152	2.1489
ind_153	-0.906828
ind_154	-1.12679
ind_155	-0.818867
ind_156	-1.39408
ind_157	-0.9732
ind_158	-0.541359
ind_159	-1.12156
ind_160	-0.665004
ind_161	1.63678
ind_162	-0.0382872
ind_163	0.6372
ind_164	-0.605339
ind_165	-0.0846306
ind_166	0.495452
ind_167	-1.11585
ind_168	1.18012
ind_169	1.84801
ind_170	-1.38896
ind_171	0.499709
ind_172	-0.141714
ind_173	-0.22023
ind_174	0.724397
ind_175	2.21865
ind_176	-0.126145
ind_177	-0.589027
ind_178	-0.925202
ind_179	-0.842142
ind_180	-1.09647
ind_181	-1.27741
ind_182	-1.34368
ind_183	1.58825
ind_184	-0.610879
ind_185	0.473823
ind_186	0.155063
ind_187	-0.714327
ind_188	2.12693
ind_190	-0.415809
ind_191	0.229908
ind_192	-0.611618
ind_194	-0.983054
ind_195	-1.35265
ind_196	-0.31042
ind_198	1.36231
ind_199	-0.32498
ind_200	-1.03349
ind_201	-0.998726
ind_202	1.23959
ind_203	0.631991
ind_204	0.652597
ind_205	-0.166087
ind_206	0.867568
ind_208	-0.809127
ind_209	0.579645
ind_210	-0.302189
ind_211	2.49365
ind_212	-0.449675
ind_213	0.661164
ind_214	-0.388844
ind_215	-0.682705
ind_216	-0.787848
ind_217	-0.928749
ind_218	-1.20592
ind_219	0.96527
ind_220	-0.607757
ind_221	0.615075
ind_222	0.083357
ind_223	-1.05257
ind_224	-0.558322
ind_225	-0.987441
ind_226	-0.37246
ind_227	-0.621104
ind_228	0.335892
ind_229	-0.681012
ind_230	-0.278743
ind_231	-2.01559
ind_232	-0.209825
ind_233	0.0554725
ind_234	0.0311596
ind_235	-1.6043
ind_236	-0.0204933
ind_237	0.55921
ind_238	-0.785761
ind_239	0.27204
ind_240	0.0947798
ind_241	-0.376932
ind_242	0.562395
*If the value is smaller than -3.59, it indicated that the clone is significent more resistant than based on maturity; if the valuse is larger than 3.59, it indicated that the clone is significent suscepitable than based on maturity.
