# Supplementary material for: Genetic Dissection of Early Blight Resistance in Tetraploid Potato
Source: Front Plant Sci. 2022 Mar 25;13:851538. doi: 10.3389/fpls.2022.851538 (PMC8990756; doi:10.3389/fpls.2022.851538)
Supplement: Supplementary file 9 [file Table_3.XLSX]

## Sheet: chr1
Supplementary Table 3. Molecular markers linkage map of chromosome 1.
Marker	Genetic Position (cM)	Physical Position
PotVar0071846	0	1155603
PotVar0071852	0.0001	1155770
solcap_snp_c2_6793	0.0002	1314398
PotVar0072068	1.32689	1606544
solcap_snp_c2_6713	2.07493	2068305
solcap_snp_c2_21078	2.95234	2497514
PotVar0044823	2.95244	2505069
solcap_snp_c2_21100	3.21773	2591141
solcap_snp_c2_21109	3.57843	2617413
solcap_snp_c2_21122	4.14384	2667266
solcap_snp_c2_21178	6.3863	2808333
PotVar0044963	6.3864	2856484
PotVar0044998	6.3865	2857176
PotVar0045000	6.3866	2857296
solcap_snp_c2_21216	6.55453	2867377
solcap_snp_c2_21233	6.87198	2956117
solcap_snp_c1_6704	6.87208	2957398
solcap_snp_c2_21235	6.87218	2958391
solcap_snp_c2_21236	6.87228	2958410
solcap_snp_c2_21247	7.44906	3087549
solcap_snp_c2_21262	7.44916	3122866
solcap_snp_c1_6707	9.07961	3207519
solcap_snp_c1_6123	9.07971	3296181
solcap_snp_c1_6122	9.64181	3412539
solcap_snp_c2_19396	11.1714	3548031
solcap_snp_c2_19384	11.1715	3567023
solcap_snp_c1_6114	11.7746	3693421
solcap_snp_c1_6109	11.7747	3716735
solcap_snp_c1_6108	11.7748	3716741
solcap_snp_c2_19358	12.1513	3749022
solcap_snp_c2_19355	12.1514	3761081
solcap_snp_c2_19353	12.1515	3762360
solcap_snp_c2_19325	13.1303	3818415
solcap_snp_c2_19310	13.1304	3836525
solcap_snp_c2_19302	13.2573	3850533
solcap_snp_c1_6087	13.6596	3922632
solcap_snp_c2_19251	13.6597	3947707
PotVar0045145	13.6598	3953114
PotVar0045339	13.6599	3957731
PotVar0045340	14.1305	3957755
solcap_snp_c1_6077	14.1306	3987492
solcap_snp_c2_19420	14.1307	4013257
PotVar0045420	14.3539	4036500
PotVar0045435	14.354	4036788
PotVar0045502	14.3541	4037810
solcap_snp_c2_51808	15.1092	4258451
solcap_snp_c2_51805	15.1093	4262991
solcap_snp_c2_51804	15.1094	4263036
solcap_snp_c2_51800	15.1095	4277333
solcap_snp_c2_51799	15.1096	4286860
solcap_snp_c2_51791	15.1097	4309411
solcap_snp_c2_49938	16.6353	4598036
solcap_snp_c2_49936	17.028	4603170
solcap_snp_c2_49955	17.0281	4637406
solcap_snp_c2_55012	17.4261	4954114
solcap_snp_c2_48054	17.4262	5078875
solcap_snp_c2_48051	17.4263	5079220
solcap_snp_c1_14212	18.1783	5140602
solcap_snp_c1_14211	18.1784	5141014
solcap_snp_c1_14210	18.1785	5142272
solcap_snp_c2_56125	18.1786	5291766
solcap_snp_c2_56114	18.1787	5319013
solcap_snp_c1_13279	18.1788	5343884
solcap_snp_c1_13304	20.2538	5380841
solcap_snp_c1_13307	20.2539	5381678
solcap_snp_c2_45070	20.254	5386788
solcap_snp_c2_45071	20.2541	5386865
solcap_snp_c2_45072	20.2542	5388030
solcap_snp_c1_13312	20.2543	5389394
solcap_snp_c2_45080	20.2544	5422341
solcap_snp_c1_13318	20.2545	5431075
solcap_snp_c2_45043	20.2546	5436670
solcap_snp_c2_45044	20.2547	5440116
solcap_snp_c2_45056	20.2548	5477755
solcap_snp_c2_45060	20.2549	5498070
solcap_snp_c1_13289	20.255	5505021
solcap_snp_c1_13290	20.2551	5505039
solcap_snp_c1_13293	20.2552	5505313
solcap_snp_c2_45065	20.2553	5506748
solcap_snp_c2_45066	20.3671	5520806
solcap_snp_c2_27876	21.6869	6071323
solcap_snp_c2_27878	21.687	6071398
solcap_snp_c2_27880	21.6871	6071587
solcap_snp_c2_27882	21.6872	6071776
solcap_snp_c2_27884	21.6873	6071878
solcap_snp_c2_27885	21.6874	6071917
solcap_snp_c1_8606	21.6875	6143327
solcap_snp_c1_8608	21.9682	6144618
solcap_snp_c2_27893	21.9683	6190256
solcap_snp_c2_27903	23.8303	6295542
solcap_snp_c2_27900	23.8304	6303560
solcap_snp_c2_27899	23.8305	6303615
solcap_snp_c2_27897	23.8306	6339050
solcap_snp_c2_27896	23.8307	6339777
solcap_snp_c2_27894	23.8308	6340020
solcap_snp_c2_27918	23.8309	6587872
solcap_snp_c2_53842	23.831	6789900
solcap_snp_c2_48155	23.8311	7165230
solcap_snp_c2_50011	24.4956	7447081
solcap_snp_c2_50013	24.4957	7447660
solcap_snp_c2_50014	24.4958	7448477
solcap_snp_c2_38350	25.3875	7874080
solcap_snp_c1_11430	26.0677	8107126
solcap_snp_c2_39571	26.1154	8217938
solcap_snp_c2_52705	26.1155	8653509
solcap_snp_c2_52704	26.1156	8653542
solcap_snp_c1_15596	26.1157	8904690
PotVar0071563	34.1259	10552544
PotVar0071575	34.126	10552798
PotVar0071624	34.1261	10558857
PotVar0071625	34.1262	10558904
PotVar0071645	34.4295	10559213
PotVar0071686	34.4296	10559698
solcap_snp_c2_48549	34.4297	10570836
solcap_snp_c2_48560	34.4298	10573344
solcap_snp_c2_48538	34.4299	10631293
solcap_snp_c2_48546	34.43	10633726
solcap_snp_c2_43644	34.7883	11388696
solcap_snp_c1_12858	34.7884	11395918
solcap_snp_c1_12859	34.7885	11396308
solcap_snp_c2_43645	34.7886	11424270
solcap_snp_c2_57290	34.7887	11771267
solcap_snp_c2_57284	34.7888	11774418
solcap_snp_c2_45631	34.7889	11854583
solcap_snp_c2_45627	35.0611	11998947
solcap_snp_c2_45626	35.0612	12000688
solcap_snp_c2_45625	35.0613	12000832
solcap_snp_c1_13538	35.0614	12004417
solcap_snp_c2_45623	35.0615	12005449
solcap_snp_c2_45621	35.3628	12005576
PotVar0134709	38.0924	12607556
solcap_snp_c2_53521	38.0925	13266749
solcap_snp_c2_43984	38.0926	13369757
solcap_snp_c1_12937	38.0983	13392398
solcap_snp_c1_12938	38.2021	13392443
solcap_snp_c2_43981	38.2052	13392593
solcap_snp_c2_43970	38.2053	13545189
solcap_snp_c1_12926	38.2054	13545700
solcap_snp_c2_43973	38.2055	13546944
solcap_snp_c1_8906	38.609	13655355
solcap_snp_c1_8907	38.6091	13655862
solcap_snp_c1_8908	38.6092	13655916
solcap_snp_c2_54353	39.7426	13747185
solcap_snp_c2_52131	39.7487	15328912
solcap_snp_c2_52130	39.7488	15328933
solcap_snp_c2_44625	39.7489	16108682
solcap_snp_c2_44629	39.749	16109824
solcap_snp_c2_49855	39.7491	16397437
solcap_snp_c2_49859	39.7492	16398197
solcap_snp_c2_49867	40.0703	16399217
solcap_snp_c2_57176	40.0704	16901062
solcap_snp_c2_57183	40.0705	16906705
solcap_snp_c2_57184	40.0706	16912196
solcap_snp_c2_57185	40.0707	16912211
solcap_snp_c2_715	40.0708	16950456
solcap_snp_c2_48568	40.0709	17370636
solcap_snp_c2_56843	40.071	18925630
solcap_snp_c1_16421	40.0711	18926884
solcap_snp_c1_16423	40.0712	18927026
solcap_snp_c1_16425	40.0713	18927247
solcap_snp_c1_16426	40.0714	18927337
solcap_snp_c1_15612	40.0715	18998405
solcap_snp_c2_53553	40.0716	19007928
solcap_snp_c1_14664	40.0717	19663894
solcap_snp_c2_49758	40.0718	19667145
solcap_snp_c2_16962	40.0719	23656850
solcap_snp_c2_55144	40.072	28116592
solcap_snp_c2_22545	40.1851	29679855
PotVar0122454	40.1852	29681830
PotVar0122466	40.1853	29682043
PotVar0122472	40.1854	29682249
PotVar0122493	40.1855	29682798
PotVar0122547	40.1856	29683413
PotVar0122548	40.1857	29683425
PotVar0122549	40.1858	29683482
PotVar0122551	40.1859	29683503
solcap_snp_c2_22531	40.186	29684899
PotVar0037331	40.1861	30115933
PotVar0037326	40.1862	30116000
solcap_snp_c2_24677	40.1863	30837971
solcap_snp_c2_24678	40.2355	30839763
solcap_snp_c1_15793	40.2596	31079485
solcap_snp_c2_54308	40.283	31088895
solcap_snp_c2_37027	40.2831	32094479
PotVar0000025	40.3978	32952995
PotVar0000040	40.3979	32953545
PotVar0000062	40.398	32953962
solcap_snp_c2_51027	40.9789	35456655
solcap_snp_c1_14955	40.979	35457764
solcap_snp_c1_14956	40.9791	35477582
solcap_snp_c2_46540	40.9792	35678032
solcap_snp_c1_13816	40.9793	35829489
solcap_snp_c1_13814	40.9794	35834252
solcap_snp_c2_46566	40.9795	35854649
solcap_snp_c2_46564	40.9796	35858310
solcap_snp_c2_46553	40.9797	35879279
solcap_snp_c1_13822	40.9798	35883365
solcap_snp_c1_15961	40.9799	36022417
solcap_snp_c1_3693	40.98	36413189
solcap_snp_c1_8535	40.9801	37070102
solcap_snp_c1_8542	40.9802	37276765
solcap_snp_c1_8541	40.9803	37276804
solcap_snp_c2_54003	41.6608	39325186
solcap_snp_c1_15714	41.8796	39325733
solcap_snp_c2_49729	42.2216	41858865
solcap_snp_c1_14648	42.4279	41947383
solcap_snp_c1_14649	42.428	41947422
solcap_snp_c2_49719	42.4281	41947504
solcap_snp_c2_49720	42.4282	41947512
solcap_snp_c2_49724	42.4283	41949345
solcap_snp_c2_49726	42.4284	41949463
solcap_snp_c1_14650	42.4285	41959412
solcap_snp_c1_14651	42.4286	41959444
solcap_snp_c1_14654	42.4287	41979122
solcap_snp_c2_32111	42.4288	42197532
solcap_snp_c2_32112	42.4289	42197568
PotVar0114096	42.429	42213455
solcap_snp_c2_50030	44.2033	43180014
solcap_snp_c2_50029	44.2034	43180445
solcap_snp_c1_14731	44.2035	43180624
solcap_snp_c2_50023	44.2036	43196026
solcap_snp_c2_50017	44.2037	43204679
solcap_snp_c1_14511	44.2038	43327549
solcap_snp_c2_49042	44.2039	43330728
solcap_snp_c2_49041	44.204	43330746
solcap_snp_c2_49031	44.2041	43335280
solcap_snp_c1_14512	44.2042	43409359
solcap_snp_c1_15563	44.2043	43581319
solcap_snp_c1_16169	47.7204	44194124
solcap_snp_c1_15452	47.7205	44430030
solcap_snp_c2_48162	47.7206	44696255
solcap_snp_c1_14248	47.7207	44696588
solcap_snp_c1_14249	47.7208	44696600
solcap_snp_c2_48166	47.7209	44700549
solcap_snp_c1_14259	47.721	44700958
solcap_snp_c1_14261	47.7211	44702400
solcap_snp_c2_48161	47.7212	44847634
solcap_snp_c1_16690	47.7213	45138089
solcap_snp_c1_11883	47.7214	45749653
solcap_snp_c2_40133	47.7215	45750040
solcap_snp_c2_40131	47.7216	45751290
PotVar0095159	47.7217	45757640
solcap_snp_c2_40112	47.7218	45757713
PotVar0095169	47.7219	45757880
PotVar0095172	47.722	45758105
PotVar0095207	47.7221	45761106
solcap_snp_c1_11872	47.7222	45777419
solcap_snp_c2_40105	47.7223	45777798
solcap_snp_c2_54811	47.7224	46270954
PotVar0132283	47.7225	46272932
PotVar0132309	47.7226	46274296
PotVar0132310	47.7227	46274329
solcap_snp_c2_35220	47.7228	47299582
solcap_snp_c2_35218	47.7229	47299905
solcap_snp_c2_14939	47.723	47761676
solcap_snp_c1_4817	47.7231	47761775
solcap_snp_c2_35603	48.4456	50790703
solcap_snp_c2_694	48.4457	51290205
PotVar0102189	48.4458	51292389
PotVar0102233	48.4459	51293622
PotVar0102234	48.446	51293649
PotVar0102235	48.4461	51293720
PotVar0102236	48.4462	51293748
solcap_snp_c2_693	48.4463	51293891
solcap_snp_c2_686	48.4464	51324358
solcap_snp_c2_41440	48.4465	52487658
PotVar0014908	48.6841	52868756
solcap_snp_c2_33286	48.6842	53256328
solcap_snp_c2_2910	48.6843	54457837
solcap_snp_c1_881	48.6844	54458947
solcap_snp_c1_880	48.6845	54480881
solcap_snp_c2_2871	48.6846	55163476
solcap_snp_c2_2874	48.6847	55163751
solcap_snp_c2_55624	48.6848	55426876
solcap_snp_c2_55621	48.6849	55427311
solcap_snp_c2_56574	50.7887	57284114
PotVar0018985	50.7888	57284365
PotVar0018983	50.7889	57284388
PotVar0018968	50.789	57284651
PotVar0018965	50.7891	57284687
solcap_snp_c2_45672	50.7892	57329716
solcap_snp_c2_45675	50.7893	57366153
solcap_snp_c1_13575	50.7894	57366209
solcap_snp_c2_51827	50.7895	57434045
solcap_snp_c2_51821	50.7896	57504144
solcap_snp_c2_51841	50.7897	57547515
PotVar0018933	50.7898	57547749
PotVar0018931	50.7899	57547884
solcap_snp_c2_43288	51.3393	57766127
solcap_snp_c2_56416	51.3394	57865129
solcap_snp_c1_14633	51.7379	57931888
solcap_snp_c1_14629	51.739	58020235
solcap_snp_c2_49619	52.0838	58072346
solcap_snp_c2_2723	52.6777	58196772
solcap_snp_c2_2721	52.6778	58197448
solcap_snp_c1_805	53.0876	58567030
solcap_snp_c1_803	53.2982	58570179
solcap_snp_c2_2653	53.4638	58737722
solcap_snp_c2_2649	53.4639	58746889
solcap_snp_c2_2637	53.464	58831041
solcap_snp_c1_779	53.6578	58903714
solcap_snp_c2_2591	53.6579	58985411
solcap_snp_c2_45299	53.658	59189560
solcap_snp_c2_45291	53.715	59267620
solcap_snp_c2_45289	54.0714	59271361
solcap_snp_c2_45286	54.0715	59288325
solcap_snp_c1_13430	54.0716	59363461
solcap_snp_c1_13429	54.0717	59363481
PotVar0018693	54.0718	59364060
PotVar0018685	54.0719	59364204
solcap_snp_c1_16040	54.2667	59441242
solcap_snp_c2_55151	54.5719	59478023
solcap_snp_c2_46520	54.9227	59974416
solcap_snp_c1_13810	54.9228	59974768
solcap_snp_c2_53347	54.9229	60027044
solcap_snp_c2_35544	54.923	60209061
solcap_snp_c2_35520	56.3406	60513299
solcap_snp_c2_35532	56.3407	60514625
solcap_snp_c2_35539	56.3408	60521672
solcap_snp_c2_43922	56.3409	60870837
PotVar0124717	56.341	60871104
PotVar0124722	56.3411	60871197
solcap_snp_c2_43926	56.3412	60887937
solcap_snp_c2_56267	56.5403	60919390
solcap_snp_c2_20798	56.7284	60951473
solcap_snp_c2_20799	56.7285	60951506
solcap_snp_c2_20803	56.7286	60987055
solcap_snp_c2_20823	56.8606	61126470
solcap_snp_c2_20829	56.8607	61135397
solcap_snp_c2_20851	57.0053	61208113
solcap_snp_c2_20858	57.0054	61220391
PotVar0006140	57.0055	61269373
PotVar0006125	57.0056	61269508
PotVar0006050	57.2526	61278594
PotVar0005994	57.3869	61279177
solcap_snp_c2_20890	57.387	61310905
solcap_snp_c2_20895	57.7252	61326558
solcap_snp_c2_20926	58.2437	61540354
PotVar0049732	58.4696	61773942
PotVar0049722	58.4796	61774082
PotVar0049721	58.4797	61774128
PotVar0049716	58.4798	61774217
solcap_snp_c2_50903	58.4799	61774592
PotVar0049691	58.48	61774655
PotVar0049689	58.4801	61774694
solcap_snp_c2_50926	58.6928	61848043
solcap_snp_c2_38436	58.769	62011105
solcap_snp_c2_38417	58.7691	62120797
solcap_snp_c2_38405	58.8875	62145049
solcap_snp_c2_38404	58.8876	62148278
PotVar0049651	58.8877	62153517
PotVar0049594	58.8878	62154150
PotVar0049593	58.8879	62154188
PotVar0049592	58.888	62154213
PotVar0049567	59.009	62154470
PotVar0049564	59.0091	62154569
PotVar0049555	59.0092	62154924
PotVar0049553	59.0093	62154967
PotVar0049549	59.0094	62155070
PotVar0049542	59.0095	62155125
solcap_snp_c2_41951	60.4096	62441868
solcap_snp_c1_12297	60.4097	62459938
solcap_snp_c2_41915	60.4098	62507874
PotVar0049521	61.0209	62600522
PotVar0049427	61.021	62602032
PotVar0049419	61.0211	62602332
solcap_snp_c1_12118	61.0212	62612685
solcap_snp_c2_41926	61.2213	62721898
solcap_snp_c2_41364	61.4459	62772108
PotVar0049369	61.446	62802259
PotVar0049351	61.4461	62802447
PotVar0049334	61.4462	62802628
solcap_snp_c1_12106	61.4463	62802774
PotVar0049267	61.6888	62857012
PotVar0049254	62.1144	62857258
solcap_snp_c2_41335	62.6363	62930839
solcap_snp_c2_41336	62.6364	62930860
solcap_snp_c2_41337	62.6365	62930893
solcap_snp_c2_41338	63.099	62931118
PotVar0049198	63.589	62966970
PotVar0049169	63.5891	62970073
PotVar0049079	63.5892	62970998
solcap_snp_c2_32367	63.8328	63183063
solcap_snp_c2_32359	64.5775	63208319
solcap_snp_c2_32346	64.7273	63269708
solcap_snp_c1_9679	64.7274	63338127
PotVar0049028	64.7275	63365123
PotVar0049010	64.7276	63365531
solcap_snp_c1_9676	64.7277	63469625
solcap_snp_c2_40956	65.0176	63724828
PotVar0126021	65.0177	63764593
PotVar0126028	65.0178	63764669
PotVar0126039	65.0721	63841740
PotVar0126043	65.0722	63841867
PotVar0126047	65.0723	63842020
PotVar0126146	65.0724	63849525
solcap_snp_c2_40955	65.0725	63874694
solcap_snp_c2_46207	66.5006	64094589
solcap_snp_c1_13686	66.5007	64120888
solcap_snp_c2_46195	66.5008	64259758
PotVar0032875	67.7869	64375618
PotVar0032877	67.787	64375655
PotVar0032879	67.7871	64375841
PotVar0032910	67.7872	64376174
PotVar0032987	67.7873	64380049
PotVar0033007	67.7874	64380301
PotVar0033013	67.7875	64380313
PotVar0033081	68.654	64610677
PotVar0033086	68.6541	64610871
solcap_snp_c1_4415	71.0266	65053506
solcap_snp_c2_13671	71.0267	65062749
solcap_snp_c2_13653	71.1812	65270050
solcap_snp_c2_14454	72.4789	65425040
PotVar0033183	72.479	65687955
PotVar0033227	72.4791	65688759
solcap_snp_c2_14467	72.6407	65694481
solcap_snp_c2_14468	72.6408	65694528
solcap_snp_c2_14470	72.6409	65696918
PotVar0033411	72.641	65697030
PotVar0033462	72.6411	65704291
PotVar0033498	72.6412	65704946
PotVar0033735	72.6413	65712644
PotVar0033829	72.7843	65737493
solcap_snp_c1_4706	72.7844	65779952
solcap_snp_c2_14487	72.7845	65780961
solcap_snp_c2_14491	72.7846	65782411
solcap_snp_c2_14492	72.7847	65782472
PotVar0033845	73.3253	65803825
PotVar0033883	73.3254	65806504
PotVar0033907	73.3255	65807269
solcap_snp_c2_14517	73.5726	65998177
solcap_snp_c1_4745	75.1352	66093982
solcap_snp_c2_14586	75.1353	66242860
solcap_snp_c1_4748	76.2792	66259225
solcap_snp_c1_4752	76.4037	66336497
solcap_snp_c2_14608	76.4038	66349597
solcap_snp_c1_4757	76.4039	66354337
PotVar0129906	76.404	66356230
PotVar0129854	76.4041	66358181
PotVar0129853	76.4042	66358197
PotVar0129817	76.4043	66358992
solcap_snp_c2_14613	76.7489	66374958
solcap_snp_c1_4763	76.749	66376215
solcap_snp_c2_37574	77.8744	66573450
solcap_snp_c2_37571	77.8745	66576047
solcap_snp_c1_5150	78.0055	66675618
solcap_snp_c2_16039	78.5596	66723137
solcap_snp_c2_16033	78.5597	66900423
PotVar0098809	78.6847	66939020
PotVar0098794	78.6848	66939323
PotVar0098727	78.6849	66942233
PotVar0098715	78.685	66942644
PotVar0098709	78.6851	66943732
PotVar0098622	78.6852	66947026
solcap_snp_c2_20569	78.6853	67013319
solcap_snp_c1_6485	79.7235	67136074
PotVar0098536	79.8743	67210899
solcap_snp_c2_20500	79.8744	67211029
PotVar0098530	79.8745	67211310
solcap_snp_c2_20501	79.8746	67211502
PotVar0098524	79.8747	67211534
solcap_snp_c2_20506	79.8748	67223718
solcap_snp_c2_20507	79.8749	67223836
PotVar0098497	80.1966	67231112
PotVar0098430	80.1967	67232067
PotVar0098421	80.1968	67232224
solcap_snp_c2_20514	80.3952	67277826
solcap_snp_c2_20517	80.3954	67279544
solcap_snp_c2_20521	80.605	67293176
solcap_snp_c2_20522	80.6545	67294103
PotVar0072119	80.6546	67599701
PotVar0072121	80.6547	67599703
PotVar0072139	81.3724	67599925
PotVar0072144	81.7243	67600100
PotVar0072157	81.7244	67600238
PotVar0072169	81.7245	67600483
PotVar0072262	81.7246	67603250
PotVar0072297	81.7247	67603962
solcap_snp_c1_6518	81.7248	67605501
solcap_snp_c2_13766	82.1743	67896790
solcap_snp_c2_52492	82.1744	67969608
solcap_snp_c2_13758	82.3644	67996863
solcap_snp_c2_52484	82.3645	68069876
PotVar0072441	82.3646	68293598
solcap_snp_c2_49467	82.7475	68399365
solcap_snp_c2_49476	82.7476	68412973
solcap_snp_c2_49451	82.7477	68416246
solcap_snp_c1_14044	83.6753	68529707
solcap_snp_c2_51055	83.883	68950390
solcap_snp_c2_51057	83.8831	68950624
PotVar0043821	83.8832	68952656
PotVar0043815	83.8833	68952770
PotVar0043814	83.8834	68952891
PotVar0043740	83.8835	68953786
PotVar0043708	83.8836	68954260
PotVar0043665	83.8837	69025111
PotVar0043656	83.8838	69025186
PotVar0043650	83.8839	69025331
solcap_snp_c1_11769	85.0189	69200171
solcap_snp_c2_39834	85.357	69381132
PotVar0043600	85.7619	69665033
solcap_snp_c2_17592	85.7783	69809843
PotVar0043570	85.9417	69870514
PotVar0043559	85.9418	69871607
PotVar0043516	86.233	69872835
PotVar0043484	86.2331	69892243
PotVar0043446	86.2332	69895259
PotVar0043429	86.2333	69895692
PotVar0043426	86.2334	69895805
PotVar0043391	86.2335	69897874
solcap_snp_c2_17529	86.2336	69902011
PotVar0043347	86.3965	69910940
solcap_snp_c1_5759	86.3966	69917893
solcap_snp_c2_17531	86.8912	70016241
solcap_snp_c2_17537	86.8913	70097516
solcap_snp_c1_5762	86.9608	70244169
solcap_snp_c1_15579	87.5478	70341065
solcap_snp_c1_15580	87.5479	70341095
solcap_snp_c2_53380	87.548	70371898
solcap_snp_c2_53381	87.5481	70372129
solcap_snp_c2_17198	88.3345	70449274
solcap_snp_c2_17193	88.3346	70472380
solcap_snp_c2_17192	88.3347	70472766
solcap_snp_c2_17191	88.3348	70474651
solcap_snp_c1_5669	88.3349	70525331
solcap_snp_c1_5656	88.4797	70562984
solcap_snp_c1_5653	88.4798	70697501
solcap_snp_c2_17156	88.4799	70750344
solcap_snp_c2_17145	88.6213	70838275
solcap_snp_c2_17185	88.7637	70917553
solcap_snp_c1_3901	89.133	71035520
solcap_snp_c2_12204	89.4011	71080747
solcap_snp_c1_3844	89.4012	71088529
solcap_snp_c2_12076	89.4013	71090764
solcap_snp_c2_12087	89.7113	71176726
solcap_snp_c2_12088	90.0287	71192586
solcap_snp_c2_12092	90.0288	71205164
solcap_snp_c2_12093	90.1831	71217122
solcap_snp_c1_3866	90.1832	71223852
solcap_snp_c2_12094	90.1833	71227570
solcap_snp_c2_12095	90.1834	71228884
solcap_snp_c1_3874	90.1835	71271523
solcap_snp_c2_12106	90.2332	71298295
solcap_snp_c2_12113	90.2674	71323357
solcap_snp_c2_12116	90.2675	71338732
solcap_snp_c1_3892	90.2676	71372921
solcap_snp_c1_3894	90.9714	71421420
solcap_snp_c2_12123	91.3675	71450058
solcap_snp_c2_12124	91.3676	71450067
solcap_snp_c2_12125	91.3677	71450400
solcap_snp_c2_12126	91.7281	71450692
PotVar0006198	91.8541	71509842
PotVar0006243	91.8542	71510837
PotVar0006246	91.8543	71510896
solcap_snp_c2_12139	91.8544	71520311
solcap_snp_c1_3922	92.7739	71713091
solcap_snp_c1_3925	92.774	71716015
solcap_snp_c2_12161	93.8273	71791540
solcap_snp_c1_3928	93.8274	71792649
PotVar0006273	93.8275	71792774
PotVar0006285	93.8276	71792980
PotVar0006304	93.8277	71793676
PotVar0006306	93.8278	71794777
PotVar0006319	93.8279	71794963
PotVar0006338	93.828	71796414
PotVar0006356	94.2824	71796719
solcap_snp_c1_3933	94.2825	71862823
solcap_snp_c1_3936	94.2826	71867046
solcap_snp_c1_3945	95.4689	71973423
solcap_snp_c2_12210	95.7715	71992871
solcap_snp_c2_12216	95.7716	72051529
solcap_snp_c2_12217	95.7717	72051556
solcap_snp_c2_12218	95.7718	72056852
solcap_snp_c1_3846	95.7719	72093577
solcap_snp_c2_12078	96.5469	72100180
solcap_snp_c1_3848	96.547	72108318
solcap_snp_c1_3851	96.5471	72111964
solcap_snp_c1_3852	96.5472	72111974
solcap_snp_c2_31857	97.063	72204951
solcap_snp_c2_31779	97.1693	72272531
solcap_snp_c1_9563	97.5933	72288415
solcap_snp_c2_31802	97.8236	72398043
solcap_snp_c2_31804	97.85	72420361
solcap_snp_c1_9571	97.8501	72492610
solcap_snp_c1_9573	98.0682	72504467
solcap_snp_c2_31820	98.0683	72528571
solcap_snp_c2_31821	98.0684	72531363
solcap_snp_c1_9587	98.0685	72540975
solcap_snp_c2_31824	98.0686	72545283
solcap_snp_c2_31828	98.0687	72550270
solcap_snp_c2_31836	98.0688	72552075
solcap_snp_c2_31850	98.1749	72597402
solcap_snp_c2_20065	99.2269	72722035
solcap_snp_c2_19956	99.227	72742546
solcap_snp_c2_19958	99.2271	72756308
solcap_snp_c1_6263	99.2272	72765725
solcap_snp_c2_19968	99.8504	72802261
solcap_snp_c2_19974	100.033	72816334
solcap_snp_c2_19975	100.23	72835626
solcap_snp_c2_19976	100.419	72844637
solcap_snp_c2_19984	100.963	72996962
solcap_snp_c1_6278	100.964	73015029
solcap_snp_c2_19991	100.964	73027537
solcap_snp_c2_20005	100.964	73088858
solcap_snp_c2_20028	102.753	73220352
solcap_snp_c2_20032	103.318	73246469
solcap_snp_c1_6294	103.386	73340313
solcap_snp_c2_20052	103.386	73368699
solcap_snp_c2_20053	103.387	73377232
solcap_snp_c2_17374	104.336	73471779
solcap_snp_c2_17372	104.336	73501723
solcap_snp_c2_17367	104.336	73517301
solcap_snp_c2_17356	104.377	73534472
solcap_snp_c2_47414	104.619	73593164
solcap_snp_c2_47429	104.619	73620771
solcap_snp_c2_47432	104.935	73635238
PotVar0006435	104.935	73667594
PotVar0006452	104.935	73667810
solcap_snp_c1_14089	104.936	73706321
solcap_snp_c1_14093	104.936	73743526
solcap_snp_c2_47427	104.936	73771086
solcap_snp_c1_14094	104.936	73785714
solcap_snp_c2_53367	104.936	73804917
solcap_snp_c2_53370	105.118	73880627
solcap_snp_c1_16401	105.118	73906470
solcap_snp_c2_14274	105.629	74061521
solcap_snp_c2_14278	105.629	74071080
solcap_snp_c2_14283	105.63	74082926
solcap_snp_c2_14286	105.63	74151818
solcap_snp_c2_14288	105.936	74151947
solcap_snp_c2_14289	105.936	74176436
solcap_snp_c1_4596	105.936	74197770
solcap_snp_c2_14304	105.936	74238932
solcap_snp_c1_4604	106.052	74257861
solcap_snp_c1_4607	106.169	74335053
solcap_snp_c1_4617	106.263	74355334
solcap_snp_c1_4622	106.285	74360132
PotVar0041560	106.285	74388550
PotVar0041585	106.285	74389555
solcap_snp_c1_4624	106.285	74390815
solcap_snp_c1_4625	106.912	74412388
solcap_snp_c2_14316	107.063	74415266
solcap_snp_c2_14330	107.063	74443637
solcap_snp_c1_4643	107.063	74455871
solcap_snp_c2_14333	107.917	74545415
solcap_snp_c2_14365	109.309	74688162
solcap_snp_c2_14366	109.31	74688218
PotVar0041660	109.31	74694877
solcap_snp_c1_4667	110.154	74788480
solcap_snp_c2_14397	110.657	74891081
solcap_snp_c1_14931	110.966	75007219
solcap_snp_c1_5254	111.141	75045959
solcap_snp_c2_16369	111.526	75163958
PotVar0041919	111.526	75191271
solcap_snp_c2_16383	111.526	75273690
solcap_snp_c1_5267	111.526	75333653
solcap_snp_c1_5270	111.663	75396308
solcap_snp_c2_16409	111.663	75399510
solcap_snp_c2_16412	111.937	75453349
solcap_snp_c1_5286	111.937	75477670
solcap_snp_c2_16424	111.937	75478358
PotVar0042350	111.937	75479893
PotVar0042358	111.937	75480040
PotVar0042443	111.937	75483906
PotVar0042444	111.937	75483921
PotVar0042445	111.937	75483975
solcap_snp_c2_16425	111.938	75485176
solcap_snp_c2_16426	111.938	75485233
PotVar0042489	111.938	75485465
solcap_snp_c2_16431	112.091	75510528
solcap_snp_c2_16435	112.235	75522069
solcap_snp_c2_16441	112.235	75539625
solcap_snp_c1_5299	112.444	75548608
solcap_snp_c2_16468	112.727	75754242
solcap_snp_c2_16478	112.728	75778494
solcap_snp_c2_16479	112.728	75780155
solcap_snp_c1_5346	112.728	75789812
PotVar0042497	112.728	75841193
PotVar0042631	112.728	75842992
PotVar0042710	112.728	75845069
solcap_snp_c2_16530	112.728	75928651
solcap_snp_c2_52789	113.264	76179844
solcap_snp_c2_52792	113.264	76206550
PotVar0110417	113.264	76289445
PotVar0110407	113.264	76289580
PotVar0110391	113.264	76289897
solcap_snp_c2_56860	113.264	76302064
solcap_snp_c2_56862	113.264	76302354
solcap_snp_c1_16432	113.265	76303922
solcap_snp_c1_16435	113.265	76304506
solcap_snp_c2_2431	113.265	76373374
solcap_snp_c2_2509	113.265	76406645
solcap_snp_c1_568	113.265	76459281
solcap_snp_c1_573	113.265	76465282
PotVar0110364	113.265	76475844
PotVar0110307	113.265	76479240
solcap_snp_c2_2291	113.265	76480545
solcap_snp_c1_593	113.265	76480647
solcap_snp_c1_594	113.266	76480694
solcap_snp_c1_630	113.266	76496528
solcap_snp_c1_636	113.266	76505319
solcap_snp_c1_641	113.266	76511247
solcap_snp_c2_56593	114	76788247
solcap_snp_c2_57526	114	76877765
solcap_snp_c2_57525	114	76884013
PotVar0028699	114	76909238
PotVar0028711	114.558	76909458
PotVar0028758	114.558	76913651
solcap_snp_c2_2400	114.558	76920170
solcap_snp_c2_2418	114.558	76939277
solcap_snp_c2_2420	114.559	76952905
solcap_snp_c2_2423	114.559	76958577
solcap_snp_c2_2424	114.694	76960016
PotVar0028802	116.018	77047473
PotVar0028811	116.018	77048163
PotVar0028819	116.018	77048403
PotVar0028830	116.018	77048594
solcap_snp_c1_698	116.018	77061201
solcap_snp_c2_2451	116.019	77080337
PotVar0028839	116.415	77130242
PotVar0028851	116.415	77130371
PotVar0028895	116.415	77131168
PotVar0028899	116.415	77131330
solcap_snp_c1_705	117.016	77154692
solcap_snp_c1_706	117.016	77157809
solcap_snp_c2_2463	117.204	77190763
solcap_snp_c2_2464	117.204	77190791
solcap_snp_c2_2465	117.204	77191340
solcap_snp_c2_2466	117.204	77191350
solcap_snp_c2_2467	117.204	77192780
solcap_snp_c1_711	117.204	77207561
solcap_snp_c2_2494	117.543	77318826
solcap_snp_c2_2497	117.543	77343089
PotVar0028949	117.814	77350693
solcap_snp_c2_2505	117.814	77350877
solcap_snp_c2_2506	117.814	77351069
PotVar0028973	117.814	77351120
solcap_snp_c2_2507	117.814	77351135
PotVar0029025	117.832	77351940
solcap_snp_c2_2508	117.832	77353150
solcap_snp_c1_730	117.832	77353237
solcap_snp_c2_2531	118.501	77432643
solcap_snp_c2_2538	119.432	77435551
solcap_snp_c1_749	119.432	77515005
solcap_snp_c1_758	119.518	77526828
solcap_snp_c2_2565	119.518	77558561
solcap_snp_c2_2567	120.716	77592358
solcap_snp_c2_2571	120.996	77596089
solcap_snp_c2_2187	121.306	77665586
solcap_snp_c1_543	121.306	77682292
solcap_snp_c2_2201	121.604	77738822
solcap_snp_c1_555	121.604	77791818
solcap_snp_c2_2213	122.381	77795793
solcap_snp_c2_2215	122.381	77798948
solcap_snp_c1_565	122.381	77802849
solcap_snp_c2_2220	122.574	77829078
solcap_snp_c2_2225	122.574	77859518
solcap_snp_c2_2246	122.574	77923629
solcap_snp_c2_2251	122.608	77932156
solcap_snp_c2_2254	122.608	77941189
PotVar0029105	122.608	77942869
PotVar0029118	122.608	77943092
PotVar0029119	123.245	77943144
PotVar0029143	123.245	77943637
solcap_snp_c2_2262	123.245	77964341
solcap_snp_c2_2273	123.358	78009879
solcap_snp_c2_2275	123.487	78036230
solcap_snp_c2_2276	123.487	78046466
solcap_snp_c1_590	124.101	78142002
solcap_snp_c1_601	124.101	78168130
solcap_snp_c1_607	124.101	78176186
solcap_snp_c2_2299	124.101	78192298
solcap_snp_c2_2308	124.102	78216532
solcap_snp_c2_2315	124.102	78236114
PotVar0029324	124.102	78348432
PotVar0029332	124.102	78348560
PotVar0029355	124.102	78348957
PotVar0029356	124.102	78348968
solcap_snp_c2_2354	124.102	78430645
solcap_snp_c2_2358	124.102	78438167
solcap_snp_c2_2360	124.102	78441020
solcap_snp_c2_2364	124.517	78454195
solcap_snp_c1_652	124.518	78543644
solcap_snp_c1_659	124.518	78552747
solcap_snp_c2_2378	124.518	78565450
solcap_snp_c2_2384	124.663	78663168
solcap_snp_c1_14853	124.799	78746831
solcap_snp_c2_50485	124.799	78756913
solcap_snp_c2_50484	124.799	78756917
solcap_snp_c2_50502	125.679	78809481
solcap_snp_c1_15872	125.679	78928270
solcap_snp_c2_7187	125.679	79009551
solcap_snp_c2_7195	125.679	79014705
solcap_snp_c2_7233	125.679	79028561
solcap_snp_c2_7007	125.708	79083750
solcap_snp_c1_2459	125.938	79083994
solcap_snp_c1_2484	126.183	79157411
solcap_snp_c2_7094	126.828	79186993
solcap_snp_c2_7106	126.828	79211647
PotVar0096829	126.828	79270802
PotVar0096812	126.828	79270996
PotVar0096805	127.51	79271115
solcap_snp_c1_2501	127.93	79276534
solcap_snp_c2_7192	127.93	79391736
solcap_snp_c2_7193	127.93	79391898
PotVar0096798	127.93	79401074
PotVar0096785	128.223	79401351
PotVar0096784	128.223	79401449
PotVar0096775	128.224	79405330
PotVar0096772	128.224	79405436
PotVar0096770	128.679	79405508
PotVar0096717	128.679	79473100
PotVar0096706	128.679	79473342
PotVar0096704	128.679	79473409
PotVar0096681	128.679	79474685
PotVar0096648	128.679	79476309
PotVar0096646	128.68	79476430
PotVar0096625	128.78	79476750
solcap_snp_c1_2520	129.27	79487385
solcap_snp_c2_7241	129.27	79678700
solcap_snp_c2_7242	129.27	79678961
solcap_snp_c2_7246	129.27	79679819
solcap_snp_c2_7248	129.271	79679995
solcap_snp_c1_2531	129.509	79711229
solcap_snp_c2_7267	129.509	79751032
solcap_snp_c1_2535	129.509	79784789
solcap_snp_c2_7269	129.509	79787170
solcap_snp_c2_7279	130.536	79797790
PotVar0049834	130.652	79819290
PotVar0049885	130.652	79821424
PotVar0049886	130.652	79821531
solcap_snp_c1_2540	130.666	79835381
solcap_snp_c1_2551	130.778	79857175
solcap_snp_c2_7306	130.784	79876671
solcap_snp_c2_7308	130.784	79892951
PotVar0049914	130.784	79893571
PotVar0049919	130.784	79893628
solcap_snp_c2_7310	130.784	79913864
solcap_snp_c2_7328	130.784	79955869
solcap_snp_c2_7331	130.784	79965043
solcap_snp_c2_7333	130.784	79978498
solcap_snp_c2_6984	130.87	80058838
solcap_snp_c2_6990	131.177	80077322
solcap_snp_c2_6995	131.523	80101545
solcap_snp_c2_6997	131.523	80101685
solcap_snp_c2_6998	131.643	80101908
solcap_snp_c1_2455	131.643	80103785
solcap_snp_c2_7002	131.643	80131849
solcap_snp_c2_7012	131.643	80154159
PotVar0049951	131.643	80154204
PotVar0050023	131.643	80161479
PotVar0050024	131.643	80161535
solcap_snp_c1_2468	131.867	80190004
solcap_snp_c2_7048	131.867	80201848
solcap_snp_c2_7053	132.58	80228612
solcap_snp_c2_7054	132.58	80229782
solcap_snp_c2_7055	132.581	80229851
solcap_snp_c2_7056	132.581	80229923
solcap_snp_c2_7059	132.581	80230402
solcap_snp_c2_7061	132.581	80230721
solcap_snp_c2_7062	132.581	80230736
solcap_snp_c1_2475	132.581	80239162
solcap_snp_c2_7068	132.581	80262082
solcap_snp_c1_1853	133.513	80429024
solcap_snp_c2_5108	133.513	80441967
PotVar0050114	133.528	80467622
PotVar0050116	133.836	80467760
solcap_snp_c1_1847	133.836	80524241
solcap_snp_c2_5102	134.14	80533628
solcap_snp_c2_5091	134.665	80559077
solcap_snp_c1_1838	134.665	80560392
solcap_snp_c2_5078	134.665	80591939
solcap_snp_c2_5077	134.665	80592092
PotVar0050201	134.665	80592226
PotVar0050306	134.665	80597840
solcap_snp_c2_5059	135.483	80638511
solcap_snp_c2_5039	135.483	80669302
PotVar0050375	135.484	80681591
PotVar0050405	135.484	80681958
PotVar0050406	136.257	80681962
PotVar0050432	136.257	80682630
PotVar0050459	136.257	80683106
solcap_snp_c2_5030	136.258	80683395
PotVar0050524	137.174	80731880
PotVar0050601	137.174	80733301
solcap_snp_c2_9728	137.174	80833304
solcap_snp_c2_9727	137.174	80833454
solcap_snp_c2_9726	137.246	80833655
solcap_snp_c1_3221	137.246	80850965
solcap_snp_c1_3210	137.246	80867138
solcap_snp_c1_3204	138.003	80904461
solcap_snp_c1_3306	138.759	80940604
PotVar0050685	138.759	80940992
PotVar0050687	138.759	80941052
PotVar0050696	138.759	80941134
PotVar0050787	138.759	80943112
solcap_snp_c2_9988	138.76	81013179
PotVar0050829	139.196	81014850
PotVar0050855	139.221	81015124
PotVar0050864	139.221	81015395
solcap_snp_c2_9970	139.781	81278260
solcap_snp_c2_9957	139.782	81294249
solcap_snp_c2_9930	140.257	81402808
solcap_snp_c2_9925	140.257	81410256
solcap_snp_c2_9922	140.389	81443076
solcap_snp_c2_9921	140.389	81452360
solcap_snp_c2_9908	140.389	81464383
solcap_snp_c2_9878	140.534	81582437
solcap_snp_c1_3281	141.017	81598650
solcap_snp_c2_9864	141.017	81615781
PotVar0061273	141.017	81622656
PotVar0061259	141.017	81622961
PotVar0061254	141.017	81622994
PotVar0061252	141.017	81623059
PotVar0061244	141.017	81623184
PotVar0061243	141.017	81623192
PotVar0061224	141.018	81632257
PotVar0061197	141.018	81632715
PotVar0061193	141.018	81632753
PotVar0061167	141.018	81633620
PotVar0061153	141.018	81635045
PotVar0061150	141.018	81635060
PotVar0061106	141.018	81637753
PotVar0061100	141.018	81637877
PotVar0061095	142.175	81637942
solcap_snp_c1_3275	142.31	81750427
solcap_snp_c2_9812	142.31	81792774
solcap_snp_c1_3255	142.311	81795435
PotVar0061044	142.311	81814254
solcap_snp_c2_9808	142.311	81814254
solcap_snp_c1_3253	142.311	81814873
solcap_snp_c2_9762	142.737	81875786
PotVar0060920	142.737	81898820
PotVar0060841	142.737	81900217
solcap_snp_c1_3241	143.165	81924913
solcap_snp_c1_3199	143.165	81936802
solcap_snp_c2_9976	143.165	81973295
solcap_snp_c1_3268	143.165	82014514
solcap_snp_c2_9744	143.399	82026244
solcap_snp_c2_9742	143.399	82029061
PotVar0060753	143.399	82029149
PotVar0060751	143.4	82029152
PotVar0060740	143.655	82029401
PotVar0060697	143.655	82031346
PotVar0060695	143.655	82031470
solcap_snp_c2_47357	144.144	82060510
PotVar0060676	144.144	82062384
solcap_snp_c2_47366	144.869	82204173
solcap_snp_c2_57090	145.51	82269475
solcap_snp_c2_53460	145.51	82303944
solcap_snp_c2_53455	145.51	82307828
solcap_snp_c2_53443	145.511	82315630
solcap_snp_c2_53420	145.806	82339567
solcap_snp_c2_53415	145.807	82340013
solcap_snp_c2_53463	145.807	82361065
solcap_snp_c2_53462	145.807	82363187
solcap_snp_c2_51684	145.807	82383303
solcap_snp_c2_51689	145.807	82407763
solcap_snp_c1_15123	146.208	82424459
solcap_snp_c2_57373	146.389	82614873
solcap_snp_c2_57378	146.988	82617353
solcap_snp_c1_1603	146.988	82643440
solcap_snp_c1_1705	146.988	82674294
solcap_snp_c2_4694	147.13	82767137
solcap_snp_c2_4755	147.13	82793591
solcap_snp_c1_1637	147.584	82935934
solcap_snp_c1_1645	147.584	82954172
solcap_snp_c2_4815	147.724	83002790
solcap_snp_c1_1653	147.725	83012088
solcap_snp_c2_4816	147.725	83016817
solcap_snp_c2_4835	147.725	83022640
solcap_snp_c2_4843	147.798	83048102
solcap_snp_c1_1683	147.872	83059266
solcap_snp_c1_1684	147.872	83059316
solcap_snp_c2_4844	147.872	83060566
solcap_snp_c2_4845	147.872	83060620
solcap_snp_c1_1688	147.872	83127368
solcap_snp_c2_4852	147.872	83129123
solcap_snp_c2_4864	148.02	83138255
solcap_snp_c2_4870	148.02	83154468
solcap_snp_c2_4875	148.02	83177518
solcap_snp_c2_4884	148.108	83187094
solcap_snp_c2_4885	148.196	83187100
solcap_snp_c2_4888	148.284	83192106
solcap_snp_c2_4898	148.372	83283673
solcap_snp_c2_4904	148.461	83416455
solcap_snp_c2_4906	148.461	83416662
solcap_snp_c2_4910	148.462	83419440
PotVar0035152	148.462	83421468
solcap_snp_c2_4920	149.26	83488954
solcap_snp_c1_1724	149.488	83502074
solcap_snp_c2_4930	149.488	83598354
solcap_snp_c2_4939	149.488	83627077
solcap_snp_c2_4943	149.488	83636095
solcap_snp_c1_1748	149.728	83705685
solcap_snp_c2_4596	151.397	83743146
solcap_snp_c2_4601	151.397	83749020
solcap_snp_c2_4602	151.397	83773587
solcap_snp_c2_4604	151.397	83782290
solcap_snp_c2_4605	151.398	83790883
solcap_snp_c2_4608	152.157	83792878
solcap_snp_c2_4609	152.157	83829837
solcap_snp_c2_4614	152.157	83843357
solcap_snp_c2_4618	152.158	83892213
solcap_snp_c2_4625	152.158	83897644
solcap_snp_c2_4627	152.158	83959859
solcap_snp_c2_4647	152.215	84023872
solcap_snp_c1_1591	152.273	84026698
PotVar0035301	152.332	84047953
PotVar0035543	152.332	84053141
PotVar0035546	152.332	84053292
solcap_snp_c2_4658	152.332	84053292
PotVar0035547	152.332	84053296
PotVar0035553	152.332	84053379
solcap_snp_c2_4661	152.332	84060649
solcap_snp_c2_4664	152.332	84062794
solcap_snp_c2_4666	152.489	84067961
solcap_snp_c2_4678	153.625	84139132
solcap_snp_c2_4702	153.626	84208108
solcap_snp_c2_4703	153.626	84210115
solcap_snp_c2_4704	153.626	84210238
solcap_snp_c2_4705	153.626	84214190
solcap_snp_c2_4706	153.626	84214236
solcap_snp_c2_4707	153.626	84214331
solcap_snp_c2_4709	153.626	84214632
solcap_snp_c2_4710	153.626	84214717
solcap_snp_c2_4711	153.626	84215031
solcap_snp_c2_4713	153.626	84217773
solcap_snp_c2_4715	153.627	84219154
solcap_snp_c2_4739	153.627	84260980
solcap_snp_c2_36561	154.326	84380691
solcap_snp_c2_36562	155.024	84393725
solcap_snp_c2_36571	155.024	84398766
PotVar0035572	155.024	84401491
solcap_snp_c2_36577	155.024	84401586
PotVar0035595	155.025	84401767
PotVar0035693	155.025	84405344
PotVar0035697	155.025	84405438
solcap_snp_c2_36579	155.025	84405463
solcap_snp_c2_36494	155.036	84456904
solcap_snp_c1_10893	155.151	84487050
solcap_snp_c2_36512	155.277	84488851
solcap_snp_c2_36534	155.277	84589267
PotVar0035746	155.277	84644353
PotVar0035758	155.277	84646789
PotVar0035827	155.278	84651694
solcap_snp_c2_36554	155.431	84685686
solcap_snp_c1_10367	155.431	84711392
solcap_snp_c2_34548	155.431	84727196
solcap_snp_c2_34547	155.431	84727244
solcap_snp_c2_34537	155.588	84808174
solcap_snp_c1_10358	155.761	84900698
solcap_snp_c2_34516	155.974	84914988
solcap_snp_c2_34513	155.974	84918963
solcap_snp_c2_34494	156.158	84951108
solcap_snp_c2_34490	156.158	84972380
solcap_snp_c1_10354	156.158	84979169
PotVar0035955	156.158	84983696
PotVar0035993	156.158	84984253
PotVar0036014	156.158	84984649
PotVar0036057	156.158	84985346
PotVar0036058	156.158	84985389
solcap_snp_c2_34478	156.832	85047878
solcap_snp_c1_18	156.832	85231880
solcap_snp_c2_57	156.832	85232162
PotVar0036142	157.381	85243704
PotVar0036150	157.381	85243850
solcap_snp_c1_22	157.381	85243930
solcap_snp_c1_23	157.381	85244059
solcap_snp_c2_24	157.381	85323395
solcap_snp_c2_25	157.744	85328633
solcap_snp_c2_35	157.868	85377346
PotVar0126572	157.868	85465288
PotVar0126613	158.232	85465940
solcap_snp_c2_46442	158.472	85499588
solcap_snp_c2_46446	158.472	85501690
solcap_snp_c2_46451	158.595	85544623
solcap_snp_c2_46455	158.712	85545111
PotVar0126809	158.712	85583856
PotVar0126918	158.712	85585427
PotVar0126969	158.713	85587040
PotVar0126993	158.853	85649169
PotVar0127016	159.073	85649444
PotVar0127023	159.073	85649593
PotVar0127072	159.073	85651599
solcap_snp_c2_13385	159.261	85715615
solcap_snp_c2_46448	159.261	85760205
solcap_snp_c2_53088	159.261	85861165
solcap_snp_c2_53077	160.393	85897859
solcap_snp_c2_53075	160.393	85902599
solcap_snp_c2_53068	160.393	85916184
solcap_snp_c2_53091	160.393	85920096
solcap_snp_c2_42948	160.393	85937691
solcap_snp_c2_42946	160.394	85945579
solcap_snp_c2_42943	161.108	85953453
solcap_snp_c2_49934	161.108	86076492
solcap_snp_c2_49933	161.108	86078901
solcap_snp_c2_49925	161.108	86088641
solcap_snp_c2_49917	161.108	86090388
solcap_snp_c2_49910	161.108	86095990
PotVar0124451	161.725	86139761
PotVar0124463	161.725	86139949
PotVar0124464	161.725	86139980
PotVar0124515	161.725	86148266
PotVar0124534	161.725	86149046
PotVar0124552	161.725	86149729
solcap_snp_c2_49905	161.725	86153327
solcap_snp_c2_14719	161.863	86264831
solcap_snp_c2_14794	161.864	86305814
solcap_snp_c2_14804	161.864	86309979
solcap_snp_c2_14839	161.864	86328884
solcap_snp_c2_14914	161.864	86346327
solcap_snp_c2_14704	161.864	86355044
solcap_snp_c2_14706	161.864	86355281
solcap_snp_c2_14707	162.042	86355313
solcap_snp_c2_14708	162.218	86356334
solcap_snp_c2_14709	162.219	86356478
solcap_snp_c1_4796	162.219	86387941
solcap_snp_c2_14718	162.219	86398597
solcap_snp_c2_14726	162.219	86434704
PotVar0111067	162.219	86445375
PotVar0110983	162.219	86447881
PotVar0110897	162.219	86450296
solcap_snp_c2_14738	162.66	86579271
solcap_snp_c2_14740	162.794	86598470
solcap_snp_c2_14741	162.794	86602967
solcap_snp_c2_14746	162.794	86628783
solcap_snp_c2_14753	163.075	86661960
solcap_snp_c1_4799	163.075	86663670
solcap_snp_c2_14760	163.506	86745999
solcap_snp_c2_14761	163.506	86750211
solcap_snp_c2_14762	163.507	86750499
solcap_snp_c2_14764	163.507	86847564
solcap_snp_c2_14766	163.507	86847750
solcap_snp_c2_14767	163.507	86848639
PotVar0099436	163.507	86852633
PotVar0099537	163.507	86853744
solcap_snp_c2_14783	163.723	86903272
solcap_snp_c1_4802	163.723	86908453
solcap_snp_c2_14795	163.943	86917251
solcap_snp_c1_4803	163.943	86942383
solcap_snp_c2_14809	164.22	87030691
solcap_snp_c2_14827	164.502	87096729
PotVar0099575	164.579	87144466
PotVar0099579	164.579	87144634
PotVar0099592	164.579	87144907
PotVar0099599	164.579	87145058
PotVar0099629	164.579	87145371
solcap_snp_c2_14843	164.579	87180917
PotVar0099653	164.579	87185434
solcap_snp_c2_14848	164.58	87196723
PotVar0099699	165.196	87242307
PotVar0099733	165.196	87242763
PotVar0099751	165.196	87245502
PotVar0099774	165.196	87245828
PotVar0099779	165.196	87245902
PotVar0099782	165.196	87245944
solcap_snp_c1_4812	165.196	87278273
solcap_snp_c2_14903	165.337	87322718
solcap_snp_c2_37836	165.627	87392925
solcap_snp_c2_37820	165.627	87463611
PotVar0099836	165.872	87542525
PotVar0099847	165.872	87544240
PotVar0099861	165.872	87544462
PotVar0099883	166.245	87547289
PotVar0099900	166.427	87547470
solcap_snp_c1_11288	166.428	87558284
solcap_snp_c2_37794	167.054	87600773
solcap_snp_c2_37830	167.054	87731582
solcap_snp_c1_11290	167.054	87749782
PotVar0122422	167.054	87888931
PotVar0122409	168.792	87889313
PotVar0122389	168.792	87889762
PotVar0122388	168.792	87889829
PotVar0122386	168.792	87889868
solcap_snp_c1_9430	168.793	87965133
solcap_snp_c2_31041	168.793	87973310
solcap_snp_c2_31042	168.979	87982085
solcap_snp_c2_22105	169.294	88057276
solcap_snp_c2_54344	169.294	88127428
solcap_snp_c2_30983	169.94	88292804
solcap_snp_c1_9413	169.94	88294149
solcap_snp_c1_9411	169.954	88294281
solcap_snp_c2_30973	170.043	88322772
solcap_snp_c2_30963	170.043	88362869
solcap_snp_c2_30961	171.32	88389559
solcap_snp_c2_30959	171.32	88451740
solcap_snp_c2_30958	171.32	88451745
solcap_snp_c2_30956	171.32	88451932
solcap_snp_c1_9386	173.611	88471573
solcap_snp_c1_9401	173.611	88572440

## Sheet: chr2
Supplementary Table 3. Molecular markers linkage map of chromosome 2.
Marker	Position (cM)	Physical Position
solcap_snp_c2_20445	0	2060425
solcap_snp_c2_20441	0.0001	2435353
solcap_snp_c2_20440	0.0002	2446485
solcap_snp_c1_6465	0.0003	3616437
solcap_snp_c2_4372	0.764586	4194794
solcap_snp_c2_4378	0.764686	4209946
solcap_snp_c1_1504	0.764786	4479389
solcap_snp_c2_56617	0.764886	4833289
solcap_snp_c1_16379	0.764986	4839524
solcap_snp_c2_56618	0.765086	4840008
PotVar0032526	0.765186	4840088
solcap_snp_c2_4344	0.765286	4885093
solcap_snp_c2_4349	0.765386	5126335
PotVar0032442	0.765486	5126738
PotVar0032432	0.765586	5126968
PotVar0032402	0.765686	5128062
PotVar0032347	0.765786	5129971
PotVar0032297	0.765886	5130932
PotVar0032210	0.765986	5157739
solcap_snp_c2_4353	1.17996	5158305
PotVar0032093	1.18006	5170152
solcap_snp_c2_4360	1.18016	5356498
solcap_snp_c1_1503	1.18026	5362501
solcap_snp_c2_57190	1.18036	5394420
solcap_snp_c2_48725	1.18046	5510774
solcap_snp_c2_48734	1.30122	5552574
solcap_snp_c2_48735	1.54819	5552679
solcap_snp_c2_11584	1.54829	6068801
solcap_snp_c1_3750	1.54839	6090074
solcap_snp_c2_11588	1.54849	6646692
solcap_snp_c2_11591	1.54859	6647786
solcap_snp_c1_16405	1.89563	6707427
solcap_snp_c1_3753	1.89573	6891436
solcap_snp_c2_11581	1.89583	7049513
solcap_snp_c1_3746	1.89593	7050595
solcap_snp_c1_3747	1.89603	7050714
solcap_snp_c2_32274	2.07737	7482750
solcap_snp_c2_4516	2.07747	7676594
solcap_snp_c2_4489	2.52313	7830109
solcap_snp_c2_4490	2.52323	7830393
solcap_snp_c2_4500	2.52333	8170031
solcap_snp_c2_4503	2.52343	8181481
solcap_snp_c2_4505	2.91889	8202528
solcap_snp_c2_4515	3.51278	8246208
solcap_snp_c2_14690	3.51288	8398866
solcap_snp_c2_14652	3.51298	8703476
solcap_snp_c2_14648	3.51308	8799527
PotVar0075207	3.51318	8893165
solcap_snp_c1_15874	3.58523	9296457
solcap_snp_c2_54579	3.95385	9299863
solcap_snp_c2_14645	3.95395	9338337
solcap_snp_c2_46464	3.95405	9766840
solcap_snp_c2_46461	3.95415	9768104
solcap_snp_c2_784	4.24124	11058949
solcap_snp_c1_241	4.24134	11059366
PotVar0109716	4.24144	11294218
solcap_snp_c2_780	4.24154	11364498
solcap_snp_c1_239	4.24164	11364732
solcap_snp_c2_775	4.24174	11576930
solcap_snp_c2_765	4.24184	11867942
solcap_snp_c1_233	4.24194	12004053
solcap_snp_c2_750	4.24204	12006788
solcap_snp_c2_737	4.24214	12187732
solcap_snp_c2_736	4.24224	12188316
solcap_snp_c2_735	4.24234	12188474
solcap_snp_c2_730	4.69083	12188989
solcap_snp_c2_721	4.69093	12233289
solcap_snp_c2_819	4.69103	12434629
solcap_snp_c2_815	4.69113	12536441
solcap_snp_c2_813	4.69123	12538232
solcap_snp_c2_811	4.69133	12644320
solcap_snp_c2_799	4.69143	12949018
solcap_snp_c2_796	4.69153	12949299
solcap_snp_c1_16173	4.69163	13235159
solcap_snp_c2_806	4.69173	13566872
solcap_snp_c2_805	4.69183	13566944
solcap_snp_c2_803	4.69193	13572207
solcap_snp_c2_32244	4.69203	13688306
solcap_snp_c2_32253	4.69213	13697423
solcap_snp_c2_32254	5.05245	13697523
solcap_snp_c2_32257	5.05255	13803194
solcap_snp_c2_32237	5.05265	13957845
solcap_snp_c2_32239	6.90732	14041901
solcap_snp_c2_32243	6.90742	14112203
solcap_snp_c2_16347	7.05904	14356628
solcap_snp_c2_16329	8.02396	14506341
solcap_snp_c2_16335	8.02406	14506693
solcap_snp_c2_16343	9.15084	14832468
solcap_snp_c2_16346	9.15094	14834997
solcap_snp_c1_5233	9.2875	15153384
solcap_snp_c2_16362	9.2876	15157259
solcap_snp_c2_41903	9.2877	15255647
solcap_snp_c2_41888	9.2878	15292916
solcap_snp_c2_41878	9.2879	15518487
solcap_snp_c2_41874	9.288	15518745
solcap_snp_c2_41906	9.50306	15695583
solcap_snp_c2_41904	9.50316	15695730
solcap_snp_c2_30950	9.50326	15758653
solcap_snp_c2_30945	9.93445	15929220
solcap_snp_c2_30940	9.93455	16034562
solcap_snp_c2_30939	9.93465	16046869
solcap_snp_c2_30937	9.93475	16050745
solcap_snp_c2_30936	9.93485	16165010
solcap_snp_c2_30929	9.93495	16166418
solcap_snp_c2_30926	9.93505	16166555
solcap_snp_c2_30915	10.6246	16222811
solcap_snp_c2_30914	10.6247	16222964
solcap_snp_c2_30912	10.6248	16229299
solcap_snp_c2_47096	10.6249	16846746
solcap_snp_c2_2940	10.625	17204927
solcap_snp_c2_2947	10.6251	17207258
solcap_snp_c2_2884	10.803	17232857
solcap_snp_c1_868	10.8031	17236308
solcap_snp_c2_49074	10.8032	17344595
solcap_snp_c2_49068	10.9042	17379552
PotVar0054559	11.3659	17742702
PotVar0054546	11.366	17760016
PotVar0054527	11.3661	17760315
solcap_snp_c2_41128	11.3662	17760560
PotVar0054490	11.3663	17761009
PotVar0054438	11.3664	17761702
PotVar0054433	11.3665	17761768
solcap_snp_c2_41124	11.3666	17834472
solcap_snp_c2_41123	12.2535	17928801
solcap_snp_c2_41108	12.2536	18042076
solcap_snp_c1_15975	13.6588	18499853
solcap_snp_c1_15974	13.6589	18501334
solcap_snp_c1_15973	13.659	18501382
solcap_snp_c2_54863	13.6591	18520191
solcap_snp_c2_30161	16.1142	19538815
solcap_snp_c2_30164	16.1143	19580609
solcap_snp_c2_55863	17.0394	19963833
solcap_snp_c2_17419	17.0395	20088758
solcap_snp_c2_17387	17.0396	20193466
solcap_snp_c2_17400	17.0397	20235232
solcap_snp_c1_16708	18.0088	20355744
solcap_snp_c2_17415	18.0089	20497672
solcap_snp_c2_17424	18.9816	20681182
solcap_snp_c2_17427	18.9817	20681291
solcap_snp_c2_17428	18.9818	20681320
solcap_snp_c2_17489	18.9819	20838296
PotVar0039500	19.8898	20838370
PotVar0039499	20.9587	20838380
PotVar0039493	20.9588	20838472
PotVar0039461	20.9589	20838832
PotVar0039456	20.959	20838940
PotVar0039417	20.9591	20843282
PotVar0039416	20.9594	20843285
PotVar0039384	21.2215	20895390
PotVar0039342	21.3997	20895957
PotVar0039296	21.3998	20903531
PotVar0039273	21.6356	20903792
PotVar0039272	21.6357	20903837
PotVar0039219	21.6358	20904633
PotVar0039194	21.8485	20906308
PotVar0039168	21.8486	20906784
solcap_snp_c2_40336	22.2395	21205475
solcap_snp_c2_57282	22.6235	21653694
solcap_snp_c1_11344	22.6236	21725617
solcap_snp_c2_38015	22.6237	21774981
solcap_snp_c2_38007	23.3047	21868107
PotVar0039094	24.0104	22003658
PotVar0039087	24.2608	22003894
PotVar0039052	24.2609	22005299
PotVar0039050	24.4065	22005405
solcap_snp_c2_38022	24.4066	22006899
PotVar0039036	24.5342	22151711
PotVar0039005	24.5343	22152144
PotVar0039004	24.5344	22152189
PotVar0039003	24.5345	22152216
PotVar0038983	24.5346	22152568
PotVar0038956	24.5347	22152915
PotVar0038942	24.5348	22153070
solcap_snp_c2_32460	25.195	22381563
solcap_snp_c2_32462	25.1951	22381719
solcap_snp_c2_32400	26.5093	22419484
solcap_snp_c2_32406	26.5094	22501415
solcap_snp_c1_9695	26.8428	22600527
solcap_snp_c1_9696	26.9833	22600985
solcap_snp_c2_32413	26.9834	22601132
solcap_snp_c2_32414	27.2622	22602048
solcap_snp_c2_32415	27.2623	22602148
solcap_snp_c2_32421	27.2624	22621454
solcap_snp_c2_32425	27.2625	22647879
solcap_snp_c2_32426	27.2626	22647911
solcap_snp_c2_32440	27.4046	22737101
solcap_snp_c1_9719	27.744	22749459
solcap_snp_c2_50885	28.148	22810921
solcap_snp_c2_50878	28.3719	22849535
solcap_snp_c2_39698	28.7399	23414755
solcap_snp_c2_39705	29.5461	23426000
solcap_snp_c2_39707	29.5462	23426096
solcap_snp_c2_39671	29.5463	23504101
solcap_snp_c2_39677	29.8608	23550242
solcap_snp_c1_11124	29.8649	23690363
solcap_snp_c2_37254	29.865	23798841
solcap_snp_c1_11123	29.8651	23799665
solcap_snp_c1_11122	29.8652	23799702
solcap_snp_c1_11120	29.8653	23799767
solcap_snp_c2_37249	29.8654	23800361
solcap_snp_c2_37245	30.2272	23983466
solcap_snp_c2_33996	30.2273	24149038
solcap_snp_c2_33993	30.2274	24184641
PotVar0029477	30.2275	24386874
PotVar0029505	30.2276	24387185
PotVar0029507	30.2277	24387239
PotVar0029530	30.2278	24387762
PotVar0029531	31.7889	24387873
PotVar0029568	31.789	24524506
solcap_snp_c2_53834	31.7891	24697697
solcap_snp_c2_53818	31.7892	24744980
solcap_snp_c2_52626	31.7893	24826032
solcap_snp_c2_52630	32.2549	24910452
solcap_snp_c2_21759	32.255	25003703
solcap_snp_c2_21752	32.2551	25050263
solcap_snp_c1_6841	32.2678	25051954
solcap_snp_c2_21722	33.6994	25322260
solcap_snp_c2_21721	34.4203	25322287
PotVar0117656	34.4204	25332356
PotVar0117650	34.4205	25332642
PotVar0117644	34.4206	25332732
PotVar0117640	34.4207	25332805
PotVar0117639	34.4208	25332954
PotVar0117603	34.4209	25337064
PotVar0117599	34.421	25337314
solcap_snp_c2_21717	34.4989	25423284
solcap_snp_c2_21682	34.499	25478266
solcap_snp_c1_6825	35.9361	25514625
solcap_snp_c2_21644	36.7283	25588394
solcap_snp_c2_21745	36.7284	25726378
solcap_snp_c1_16021	37.1152	25838557
PotVar0088857	37.1153	25894217
PotVar0088873	37.1154	25894396
PotVar0088875	37.1155	25894417
PotVar0088884	37.1156	25894597
PotVar0088932	37.1157	25895237
PotVar0088935	37.1158	25895333
PotVar0088936	37.1159	25895383
solcap_snp_c1_11502	37.116	25934916
solcap_snp_c1_11499	37.1161	25936033
solcap_snp_c1_11498	37.1162	25936087
PotVar0089066	37.5738	26024478
PotVar0089068	37.636	26024622
PotVar0089071	37.6361	26024746
solcap_snp_c2_38704	37.6362	26025648
solcap_snp_c1_11491	37.9373	26158341
solcap_snp_c2_38723	39.9064	26196014
solcap_snp_c2_38721	40.1488	26199529
solcap_snp_c1_11494	40.1489	26262335
PotVar0089083	40.149	26538702
PotVar0089166	40.1491	26540156
PotVar0089174	40.1492	26540418
PotVar0089221	40.6554	26583266
PotVar0089232	40.6555	26583415
PotVar0089235	40.6556	26583598
PotVar0089271	40.6557	26583936
PotVar0089284	40.6558	26584179
PotVar0089300	41.0167	26584568
PotVar0089338	41.0267	26606332
PotVar0089350	41.0268	26606549
solcap_snp_c1_9356	41.0269	26744045
solcap_snp_c2_30878	41.6047	26777737
solcap_snp_c1_9374	41.6048	26897444
solcap_snp_c2_56640	41.929	26939177
solcap_snp_c2_45380	43.032	27032963
solcap_snp_c2_45307	43.1656	27086672
solcap_snp_c2_45308	43.1657	27086756
solcap_snp_c2_45310	43.1658	27088040
solcap_snp_c2_45311	43.1659	27088240
PotVar0124341	43.4006	27089077
PotVar0124339	43.4007	27089130
PotVar0124308	43.4008	27089538
PotVar0124248	43.4009	27090334
solcap_snp_c2_45322	43.401	27099641
solcap_snp_c2_45323	43.4011	27099743
solcap_snp_c1_13459	45.5101	27143975
solcap_snp_c1_13465	45.6479	27190087
PotVar0124158	45.648	27325060
PotVar0124145	45.6481	27325452
PotVar0124132	45.6482	27325817
PotVar0124113	45.996	27328018
PotVar0124112	45.9961	27328113
solcap_snp_c1_12339	45.9962	27411239
solcap_snp_c1_12345	46.5066	27412222
solcap_snp_c1_12305	46.5067	27459050
PotVar0123993	46.5068	27511390
PotVar0123980	46.5069	27511610
solcap_snp_c2_41963	47.7413	27511649
PotVar0123939	47.8981	27512778
solcap_snp_c1_12310	47.8982	27553265
solcap_snp_c2_41980	48.008	27557527
PotVar0123873	48.2615	27601758
PotVar0123847	48.2616	27602074
PotVar0123834	48.2617	27603107
PotVar0123826	48.2618	27603301
PotVar0123791	48.2619	27605467
solcap_snp_c1_12329	48.5972	27618678
solcap_snp_c1_12330	48.5973	27618698
solcap_snp_c2_42059	48.5974	27676733
solcap_snp_c2_38942	48.5975	27856828
solcap_snp_c2_38941	48.7414	27856858
solcap_snp_c2_38939	48.7533	27856921
solcap_snp_c1_11553	48.7534	27857419
solcap_snp_c2_38938	48.7535	27859923
solcap_snp_c2_38936	49.5412	27860001
solcap_snp_c2_38930	50.1549	27888320
solcap_snp_c1_11556	50.155	28040094
solcap_snp_c2_52135	50.1551	28112404
solcap_snp_c1_15213	50.1552	28147347
solcap_snp_c2_38955	50.1553	28230155
solcap_snp_c2_38953	50.5206	28230185
solcap_snp_c2_38952	50.5207	28230212
solcap_snp_c1_13769	51.6418	28505685
solcap_snp_c2_19658	51.6419	28555890
solcap_snp_c2_19670	51.642	28614244
PotVar0062831	51.6421	28744997
PotVar0062825	51.7718	28745152
PotVar0062811	51.7719	28745315
PotVar0062786	51.9917	28746087
solcap_snp_c2_19692	51.9918	28746087
PotVar0062783	51.9919	28746173
PotVar0062762	51.992	28747644
PotVar0062655	52.7014	28751335
PotVar0062640	52.7015	28751553
solcap_snp_c2_15789	52.7427	28815994
solcap_snp_c2_15786	52.7428	28816274
solcap_snp_c1_5091	53.0324	28831038
solcap_snp_c1_5088	53.0325	28832309
PotVar0062589	54.259	28914801
solcap_snp_c2_15749	54.2591	28938773
solcap_snp_c2_15857	54.8166	28994762
solcap_snp_c2_48238	55.0724	29093735
solcap_snp_c1_14280	55.0725	29135932
solcap_snp_c2_48198	55.9134	29136168
solcap_snp_c2_48195	55.9135	29136866
solcap_snp_c2_39155	55.9136	29312995
PotVar0062569	56.0638	29412515
PotVar0062483	56.0639	29473499
solcap_snp_c2_51111	56.9067	29653519
PotVar0062469	57.0365	29705380
PotVar0062467	57.0366	29705449
PotVar0062448	57.0367	29706741
PotVar0062438	57.1752	29707121
PotVar0062340	57.2956	29708578
solcap_snp_c1_14983	57.4246	29747131
PotVar0062277	57.4247	29748626
PotVar0062276	57.4248	29748698
PotVar0062269	57.4249	29748875
PotVar0062268	57.5876	29748931
PotVar0062231	57.5877	29749652
solcap_snp_c2_51109	57.5878	29754165
PotVar0062142	57.5879	29762269
PotVar0062114	57.588	29763143
PotVar0062077	57.5881	29763759
PotVar0062046	57.8953	29764279
solcap_snp_c2_534	59.3902	29861092
solcap_snp_c1_13912	59.3903	29883619
solcap_snp_c1_13919	59.3904	29887776
solcap_snp_c1_13923	59.3905	29888001
solcap_snp_c2_46903	59.3906	29922614
solcap_snp_c2_46904	59.6015	29922863
solcap_snp_c2_46906	59.6787	29922924
solcap_snp_c2_46909	59.6788	29930069
solcap_snp_c1_13910	59.6789	29990972
solcap_snp_c1_13911	59.679	30022358
solcap_snp_c2_46885	59.6791	30044642
solcap_snp_c2_46887	59.6792	30044782
solcap_snp_c2_46898	59.77	30147347
solcap_snp_c2_56498	59.7701	30217694
solcap_snp_c1_7439	59.7702	30314629
solcap_snp_c2_23206	60.1854	30345177
solcap_snp_c1_7469	60.1855	30364307
PotVar0082561	60.1856	30395725
PotVar0082550	60.5902	30395964
PotVar0082538	60.5903	30396254
PotVar0082531	60.5904	30396383
PotVar0082517	60.5905	30396554
solcap_snp_c1_7412	60.5906	30401430
solcap_snp_c1_7430	60.5907	30480670
solcap_snp_c2_23139	61.2093	30534382
PotVar0082485	61.2094	30545134
PotVar0082484	61.2095	30545147
PotVar0082446	61.2096	30549211
PotVar0082442	61.2097	30549304
PotVar0082429	61.2098	30550166
PotVar0082380	61.2099	30551108
PotVar0082332	61.21	30551654
PotVar0082331	61.2101	30551747
PotVar0082295	62.4584	30785077
solcap_snp_c2_23170	63.9995	30785663
PotVar0082263	63.9996	30785778
PotVar0082241	63.9997	30786043
PotVar0082228	63.9998	30786195
PotVar0082226	63.9999	30786203
PotVar0082195	64	30786493
PotVar0082191	64.0001	30786557
PotVar0082177	64.0002	30786674
PotVar0082166	65.988	30786802
solcap_snp_c2_23178	66.3945	30909109
solcap_snp_c2_23188	66.3946	31021346
solcap_snp_c2_23192	66.3947	31060140
PotVar0094115	66.3948	31350044
PotVar0094122	67.3245	31350263
PotVar0094171	67.3246	31351454
PotVar0094218	67.3247	31352137
PotVar0094229	67.3248	31352317
PotVar0094231	67.3249	31352361
PotVar0094234	67.325	31352403
PotVar0094265	67.3251	31352764
PotVar0094274	67.3252	31352869
PotVar0094348	67.5834	31448004
PotVar0094352	67.5835	31448136
PotVar0094354	68.2518	31448243
PotVar0094355	68.2519	31448378
PotVar0094361	68.252	31448465
PotVar0094371	68.2521	31448769
PotVar0094383	68.2522	31449005
PotVar0094411	68.2523	31449554
PotVar0094414	68.2524	31449616
solcap_snp_c1_12169	68.3302	31520933
PotVar0094459	68.772	31547643
PotVar0094475	69.2414	31547839
solcap_snp_c2_41534	69.2415	31571293
solcap_snp_c2_41541	69.254	31590970
solcap_snp_c2_41551	70.1482	31621062
PotVar0094522	70.2747	31667452
PotVar0094535	70.2748	31667607
PotVar0094537	70.2749	31667680
PotVar0094539	70.275	31667698
PotVar0094548	70.2751	31667894
PotVar0094561	70.2752	31668165
PotVar0094573	70.2753	31668245
PotVar0094582	70.4014	31668508
solcap_snp_c1_13233	70.4015	31714404
PotVar0094614	70.834	31863779
solcap_snp_c2_44982	71.3982	31885152
solcap_snp_c2_39191	71.95	32084808
PotVar0111703	71.9501	32132162
PotVar0111704	72.1218	32132199
PotVar0111837	72.1219	32133605
PotVar0111850	72.122	32133776
PotVar0111874	72.1221	32134793
solcap_snp_c2_39178	72.6166	32148414
solcap_snp_c2_39175	74.5627	32166954
solcap_snp_c1_11581	74.5628	32220107
solcap_snp_c2_56392	74.7468	32487468
solcap_snp_c2_44771	74.9997	32647366
solcap_snp_c2_44774	75.5015	32668601
PotVar0131484	75.6407	32668640
PotVar0131493	75.6408	32668851
solcap_snp_c1_13187	75.6409	32669719
solcap_snp_c2_44776	75.839	32669950
solcap_snp_c2_44777	75.8391	32670900
solcap_snp_c2_44778	75.8392	32671197
solcap_snp_c2_44768	75.8393	32806337
solcap_snp_c2_44769	75.8394	32820618
solcap_snp_c2_44770	75.8395	32822982
PotVar0120925	76.6267	33160910
PotVar0120916	76.6268	33161160
PotVar0120910	76.6269	33161298
PotVar0120894	76.627	33161478
PotVar0120885	76.6271	33161656
PotVar0120864	76.6272	33161878
PotVar0120856	76.6966	33161999
solcap_snp_c2_51995	76.7622	33266694
solcap_snp_c2_51998	76.8273	33270568
PotVar0120829	76.8928	33276124
PotVar0120822	76.8929	33276255
PotVar0120820	76.893	33276285
PotVar0120706	76.8931	33278954
PotVar0120697	76.8932	33279080
solcap_snp_c2_51985	77.9226	33352128
solcap_snp_c2_51986	79.0627	33352248
solcap_snp_c2_51990	79.0628	33357550
PotVar0037918	79.3366	33903944
PotVar0037922	79.3367	33904041
solcap_snp_c2_52611	79.3368	33904081
PotVar0037977	79.3369	33904943
PotVar0037982	79.3893	33905026
PotVar0038002	79.3894	33959734
PotVar0038032	79.3895	33960423
PotVar0038033	79.3896	33960472
PotVar0038035	79.3897	33960526
PotVar0038036	79.3898	33960559
PotVar0038136	79.3899	33963253
PotVar0038206	79.39	34026293
PotVar0038224	79.3901	34027352
PotVar0038345	79.3902	34029182
solcap_snp_c1_12287	79.3903	34078475
solcap_snp_c1_12257	80.1096	34211649
solcap_snp_c2_41837	80.1097	34355540
PotVar0038424	80.1098	34560748
PotVar0038504	82.6712	34561843
solcap_snp_c2_33108	82.6713	34739125
PotVar0038601	82.6714	34813551
PotVar0038650	82.6715	34815500
PotVar0038665	82.6716	34815811
PotVar0038674	82.6717	34816049
solcap_snp_c2_40153	85.1446	35030182
PotVar0038725	85.1447	35111438
PotVar0038744	85.1448	35111835
PotVar0038755	85.1449	35112246
solcap_snp_c2_40155	85.145	35112246
PotVar0038760	85.1451	35112357
PotVar0038869	85.1452	35116125
solcap_snp_c2_40167	85.3553	35183791
solcap_snp_c2_40169	85.3554	35186249
solcap_snp_c2_40170	85.3555	35186330
solcap_snp_c2_40172	85.6247	35186396
solcap_snp_c2_50570	85.6248	35399277
solcap_snp_c2_55199	86.4204	35523028
solcap_snp_c2_50412	86.4205	35600642
solcap_snp_c2_50405	88.066	35657856
PotVar0128389	88.0661	35666972
PotVar0128434	88.0662	35669324
PotVar0128435	88.6559	35669382
solcap_snp_c2_27433	88.7544	35990827
solcap_snp_c2_27437	88.7545	36019372
solcap_snp_c2_17973	89.5356	36229830
solcap_snp_c2_17951	91.426	36344205
PotVar0045671	91.4261	36363496
PotVar0045674	91.4262	36363617
solcap_snp_c2_17938	91.4263	36364447
PotVar0045713	91.4264	36364535
solcap_snp_c2_17937	91.4265	36364535
PotVar0045716	91.4266	36364697
solcap_snp_c2_17935	91.4267	36364709
solcap_snp_c2_17932	91.4658	36364867
solcap_snp_c2_17930	91.5249	36365001
PotVar0045735	91.525	36365517
solcap_snp_c2_17926	91.5251	36365601
solcap_snp_c2_17925	91.5252	36365652
PotVar0045768	92.0453	36366195
PotVar0045827	92.0454	36369750
PotVar0045830	92.0455	36369844
PotVar0045852	92.214	36370684
PotVar0045853	92.2141	36370702
PotVar0045886	92.2142	36372170
solcap_snp_c2_17921	92.2143	36375306
PotVar0045952	92.2144	36378820
PotVar0045967	93.1984	36379091
PotVar0045981	93.3492	36420919
PotVar0046023	93.3493	36422306
solcap_snp_c2_17914	93.3494	36422460
solcap_snp_c2_17900	93.3495	36455167
solcap_snp_c2_17899	93.3496	36455254
solcap_snp_c2_17896	93.3497	36455707
solcap_snp_c2_17887	93.7677	36484050
PotVar0046065	93.8425	36485533
PotVar0046109	94.3721	36486200
PotVar0046123	94.7032	36486485
PotVar0046178	94.7033	36487614
PotVar0046179	94.7034	36487689
PotVar0046221	95.3614	36547962
solcap_snp_c2_17867	95.3615	36548178
PotVar0046249	95.3616	36548651
PotVar0046292	95.3617	36549978
PotVar0046294	95.3618	36550070
solcap_snp_c2_17864	95.3619	36550070
solcap_snp_c2_17858	95.362	36599213
solcap_snp_c2_17816	95.754	36728587
solcap_snp_c2_17814	96.1467	36766635
solcap_snp_c1_5844	96.1468	36769707
solcap_snp_c2_17809	96.1469	36799197
solcap_snp_c2_17807	96.147	36801968
solcap_snp_c1_5837	96.1471	36837559
solcap_snp_c2_17795	96.1472	36842663
PotVar0046361	96.1473	36844916
PotVar0046416	96.1474	36845853
PotVar0046418	96.1475	36845933
PotVar0046419	96.1476	36845958
PotVar0046427	96.1477	36846084
PotVar0046535	96.5038	36932018
PotVar0046548	97.3172	36940997
PotVar0046549	97.3173	36941026
PotVar0046554	97.3174	36941161
PotVar0046610	97.3175	36946645
PotVar0046637	97.3176	36947081
PotVar0046685	97.3177	36947644
PotVar0046721	99.6858	36948208
PotVar0046724	99.6859	36948345
PotVar0046725	99.686	36948412
PotVar0046784	99.6861	36956968
PotVar0046900	99.6862	36958659
PotVar0046936	99.6863	36959370
PotVar0046976	99.6864	37015403
PotVar0047011	99.6865	37015846
PotVar0047020	99.6866	37016046
solcap_snp_c1_12377	99.6867	37341815
solcap_snp_c2_42244	99.6868	37369714
solcap_snp_c1_12386	99.6869	37411847
solcap_snp_c2_42169	100.094	37438491
solcap_snp_c2_42172	100.094	37439083
solcap_snp_c2_55632	100.759	37474756
solcap_snp_c1_16171	100.759	37474969
solcap_snp_c1_16172	100.759	37475092
solcap_snp_c1_12373	101.386	37530501
PotVar0116077	102.024	37574949
PotVar0116072	102.024	37575038
PotVar0116070	102.024	37575062
PotVar0115989	102.625	37575699
PotVar0115988	102.625	37575730
PotVar0115985	102.625	37575797
PotVar0115971	102.625	37575887
PotVar0115953	102.625	37576148
PotVar0115923	102.722	37576518
PotVar0115845	102.722	37577408
solcap_snp_c2_42219	102.722	37577586
PotVar0115816	103.049	37578279
solcap_snp_c1_12382	103.051	37654538
solcap_snp_c2_42241	103.053	37676152
solcap_snp_c1_10494	103.737	37846065
solcap_snp_c1_10492	104.131	37890658
solcap_snp_c1_10491	104.31	37903454
PotVar0118943	104.721	37971730
PotVar0118964	104.721	37972522
PotVar0118971	104.721	37972925
PotVar0119003	104.721	37973355
PotVar0119007	104.722	37973385
PotVar0119013	104.797	37973506
solcap_snp_c2_35165	104.797	37982843
solcap_snp_c2_35139	104.797	38046786
solcap_snp_c2_35113	105.541	38121256
solcap_snp_c2_35147	105.541	38230143
solcap_snp_c2_52930	106.152	38336064
PotVar0010948	106.152	38466148
PotVar0010943	106.601	38466268
PotVar0010934	106.601	38466512
PotVar0010926	106.601	38466609
PotVar0010878	106.601	38501402
PotVar0010877	106.772	38501490
PotVar0010835	106.772	38502436
PotVar0010787	106.772	38502828
solcap_snp_c2_51887	107.122	38507621
solcap_snp_c2_40610	107.297	38654150
PotVar0010677	107.297	38654584
PotVar0010676	107.297	38654686
PotVar0010664	107.297	38655156
PotVar0010618	107.297	38658966
solcap_snp_c2_53037	108.615	38688212
solcap_snp_c2_53036	108.615	38688295
solcap_snp_c2_53035	108.615	38688398
solcap_snp_c2_53034	108.615	38688454
solcap_snp_c2_53033	108.616	38688568
solcap_snp_c2_53022	108.616	38744541
solcap_snp_c2_52724	109.207	38900083
PotVar0010586	109.207	38969716
PotVar0010568	109.207	38969934
PotVar0010542	109.207	38976569
PotVar0010538	109.207	38976624
PotVar0010536	109.207	38976683
PotVar0010523	109.207	38977103
solcap_snp_c1_11972	109.499	39062507
solcap_snp_c1_11973	109.499	39062550
solcap_snp_c2_40635	109.499	39073504
solcap_snp_c2_40636	109.499	39073567
solcap_snp_c2_40638	109.499	39073798
PotVar0010500	109.499	39076994
PotVar0010401	109.499	39079631
solcap_snp_c2_42132	109.499	39144889
solcap_snp_c2_42133	109.499	39144899
PotVar0010353	109.5	39153841
PotVar0010345	109.5	39154378
PotVar0010288	109.5	39156199
PotVar0010270	109.5	39156553
PotVar0010184	109.5	39157645
solcap_snp_c2_42126	109.733	39369211
solcap_snp_c2_42127	109.733	39369313
solcap_snp_c2_42128	109.733	39369457
solcap_snp_c2_42130	109.733	39370219
PotVar0010147	109.733	39380974
PotVar0010135	109.733	39381090
solcap_snp_c2_25878	110.318	39494077
solcap_snp_c2_25766	110.486	39593338
PotVar0010102	110.486	39604672
PotVar0010079	110.486	39605206
PotVar0010076	110.486	39605401
PotVar0010064	110.486	39605614
solcap_snp_c1_8113	114.285	39934251
solcap_snp_c1_8118	114.285	39940755
PotVar0009955	114.285	39964346
PotVar0009949	114.285	39967602
PotVar0009928	114.285	39968002
PotVar0009917	114.286	39968216
PotVar0009894	114.286	39968622
PotVar0009882	114.286	39968872
solcap_snp_c1_8124	114.286	39969873
solcap_snp_c1_8125	114.286	39969910
solcap_snp_c2_25896	114.345	40132479
solcap_snp_c2_25897	114.647	40132605
PotVar0009867	115.827	40242636
PotVar0009865	116.062	40242691
PotVar0009857	116.186	40242824
PotVar0009846	116.187	40242920
PotVar0009827	117.644	40243261
PotVar0009808	117.644	40243563
PotVar0009747	117.644	40251906
PotVar0009673	117.644	40252701
PotVar0009651	117.644	40253455
PotVar0009624	117.644	40253821
PotVar0009610	117.645	40254137
PotVar0009575	117.645	40294335
PotVar0009567	117.645	40294533
solcap_snp_c2_25179	117.645	40294533
PotVar0009548	117.645	40294831
PotVar0009542	118.097	40295023
solcap_snp_c1_7964	118.097	40295082
PotVar0009505	118.097	40295787
PotVar0009474	118.097	40307547
PotVar0009466	118.097	40307945
PotVar0009460	118.097	40308034
PotVar0009458	118.097	40308084
PotVar0009429	118.097	40336425
PotVar0009283	118.098	40340053
PotVar0009282	118.098	40340056
PotVar0009281	118.254	40340135
solcap_snp_c2_25143	119.285	40435644
PotVar0009178	119.717	40632942
PotVar0009170	119.717	40633213
solcap_snp_c2_25044	120.177	40795971
solcap_snp_c1_7957	120.177	40896280
solcap_snp_c2_7501	120.177	40989011
solcap_snp_c2_7549	120.891	41348074
solcap_snp_c2_7555	120.894	41356869
solcap_snp_c2_7558	120.894	41357618
solcap_snp_c2_7559	120.894	41357648
PotVar0090156	122.314	41360094
PotVar0090139	122.314	41360439
PotVar0090129	122.314	41360540
solcap_snp_c2_7565	122.314	41368249
solcap_snp_c2_7610	123.512	41525707
solcap_snp_c2_7631	124.148	41637553
PotVar0090100	124.345	41786536
PotVar0090084	124.346	41786931
PotVar0090078	124.346	41787094
PotVar0090074	124.346	41787368
PotVar0090060	125.17	41787809
solcap_snp_c1_2640	125.17	41814861
PotVar0089995	125.472	41888929
solcap_snp_c1_2655	125.472	41911010
solcap_snp_c1_2657	125.472	41911264
solcap_snp_c1_2658	125.472	41911481
solcap_snp_c1_2574	126.835	42014714
solcap_snp_c2_7401	127.153	42082955
solcap_snp_c2_7422	127.467	42178510
solcap_snp_c1_2587	127.467	42179952
solcap_snp_c2_7426	127.467	42180125
solcap_snp_c2_7457	127.467	42243108
solcap_snp_c1_16542	128.196	42320744
solcap_snp_c1_16540	128.196	42320752
solcap_snp_c1_15746	129.334	42346319
solcap_snp_c2_22939	129.334	42474431
solcap_snp_c1_7346	129.807	42597150
solcap_snp_c1_7342	130.754	42645671
solcap_snp_c1_7341	130.754	42657363
solcap_snp_c2_22894	130.754	42660643
solcap_snp_c2_22890	131.927	42663931
solcap_snp_c2_22858	133.535	42727397
solcap_snp_c2_22853	133.535	42733475
PotVar0118890	133.535	42737881
PotVar0118901	133.535	42738221
PotVar0118910	134.709	42738348
PotVar0118925	134.709	42738765
PotVar0118933	134.71	42739012
solcap_snp_c1_7325	134.71	42764457
solcap_snp_c2_22842	135.199	42777302
solcap_snp_c1_7337	135.199	43250271
PotVar0006681	135.2	43268877
PotVar0006684	135.2	43268920
PotVar0006700	135.586	43270563
PotVar0006735	135.587	43273171
PotVar0006793	135.587	43275884
PotVar0006826	135.587	43276245
PotVar0006851	135.587	43276648
PotVar0006863	135.587	43276842
solcap_snp_c1_7268	135.587	43283777
PotVar0006925	138.131	43526775
PotVar0006947	138.131	43527425
PotVar0006948	138.718	43527445
solcap_snp_c1_8442	140.346	43790625
PotVar0006989	140.346	43805014
PotVar0007045	140.496	43807258
PotVar0007066	140.496	43807881
PotVar0007146	140.496	43809891
solcap_snp_c2_27218	140.496	43809958
solcap_snp_c2_53595	140.663	43849402
PotVar0007240	140.663	43872417
solcap_snp_c2_53584	142.142	43886511
solcap_snp_c2_27372	143.642	44159208
solcap_snp_c2_27269	143.642	44458217
solcap_snp_c2_27270	143.643	44458261
solcap_snp_c2_27271	143.643	44458744
PotVar0001550	143.643	44561226
PotVar0001571	144.147	44562326
solcap_snp_c2_43350	147.56	44773246
solcap_snp_c2_43348	147.56	44773405
solcap_snp_c1_12775	147.561	44798559
solcap_snp_c1_12771	148.261	44810486
PotVar0001704	148.682	45021042
PotVar0001710	148.682	45021336
solcap_snp_c1_12533	148.682	45034043
PotVar0001749	148.682	45037953
PotVar0001780	148.682	45038439
solcap_snp_c2_42603	148.682	45047787
PotVar0001789	148.683	45088804
PotVar0001799	149.345	45088992
PotVar0002020	149.346	45105742
solcap_snp_c1_12509	149.346	45147257
solcap_snp_c2_42570	149.346	45147540
solcap_snp_c2_14979	153.003	45449277
solcap_snp_c1_4847	153.003	45616777
solcap_snp_c2_15018	153.003	45618397
solcap_snp_c2_15021	153.003	45618817
solcap_snp_c1_4849	153.004	45619058
solcap_snp_c2_15040	153.004	45649739
solcap_snp_c2_15041	153.55	45652445
solcap_snp_c2_15043	153.551	45652583
solcap_snp_c2_15044	153.551	45652664
solcap_snp_c2_15047	153.691	45652977
solcap_snp_c2_15065	153.692	45694416
solcap_snp_c1_4860	153.746	45695531
solcap_snp_c2_15066	153.75	45695537
solcap_snp_c2_15067	153.75	45695588
solcap_snp_c2_15070	153.921	45695772
PotVar0002097	154.19	45749415
PotVar0002114	154.19	45749945
PotVar0002132	154.19	45750216
PotVar0002139	154.191	45750406
solcap_snp_c1_4881	154.191	45756358
solcap_snp_c2_15215	154.894	45917290
PotVar0002440	158.989	46265719
PotVar0002507	160.135	46729918
PotVar0002530	160.135	46731118
PotVar0002533	160.135	46731334
PotVar0002556	160.135	46732230
PotVar0002607	160.135	46756429
PotVar0002627	160.65	46756739
PotVar0002736	160.65	46774414
PotVar0002772	160.65	46940897
PotVar0002819	160.65	46963288
PotVar0002861	160.651	46963872
solcap_snp_c2_47199	161.036	47137638
solcap_snp_c2_47200	161.036	47137763
solcap_snp_c2_47202	161.037	47142731
solcap_snp_c2_35810	163.019	47223807
solcap_snp_c2_35690	163.295	47324335
solcap_snp_c2_35697	163.295	47325613
solcap_snp_c2_35704	163.312	47327530
solcap_snp_c2_35789	164.796	47571153
PotVar0002940	165.598	47625643
PotVar0002944	166.41	47625735
solcap_snp_c2_18193	167.019	47722111
PotVar0003054	167.019	47730726
PotVar0003253	167.019	47736033
PotVar0003379	167.508	47819463
solcap_snp_c2_18113	170.264	47974047
solcap_snp_c2_18065	170.264	48166572
PotVar0003452	170.264	48178952
PotVar0003459	170.264	48179125
PotVar0003609	170.487	48257252
PotVar0003726	170.488	48436013
solcap_snp_c1_5931	170.488	48498156

## Sheet: chr3
Supplementary Table 3. Molecular markers linkage map of chromosome 3.
Marker	Position (cM)	Physical Position
solcap_snp_c2_43483	0	831417
solcap_snp_c2_51389	0.0001	983008
solcap_snp_c1_15782	0.575123	1276837
solcap_snp_c2_52800	0.758125	1536781
solcap_snp_c2_52809	1.15537	1575045
solcap_snp_c2_52811	1.15547	1580212
solcap_snp_c2_52815	1.15557	1612323
PotVar0019237	2.34382	2232629
PotVar0019246	2.34392	2232766
PotVar0019259	2.34402	2233117
solcap_snp_c2_17279	3.16265	2357814
solcap_snp_c2_50372	3.80994	2524231
solcap_snp_c1_14813	3.90217	2565354
PotVar0019472	4.24067	2743626
PotVar0019474	4.24077	2743783
solcap_snp_c2_46836	4.45541	2870977
PotVar0019512	5.07438	2915314
PotVar0019521	5.07448	2915602
solcap_snp_c2_52470	11.0499	4677583
solcap_snp_c2_52473	11.05	4679190
solcap_snp_c1_8970	11.7594	5430309
solcap_snp_c1_8968	11.7595	5430430
solcap_snp_c2_29450	11.7596	5448586
solcap_snp_c2_57639	12.3833	5544374
solcap_snp_c1_8974	13.1348	5657114
solcap_snp_c2_50636	13.1349	5721171
solcap_snp_c2_50635	13.135	5721229
solcap_snp_c2_52838	13.5602	6836476
solcap_snp_c2_5267	15.8906	7105399
solcap_snp_c2_5261	15.8907	7133046
solcap_snp_c2_5259	15.8908	7134729
solcap_snp_c2_5239	16.5735	7288799
solcap_snp_c2_5238	16.5736	7288867
solcap_snp_c2_5234	16.6167	7289711
PotVar0021463	16.7117	7334281
PotVar0021457	16.7118	7334356
PotVar0021454	16.7119	7334513
PotVar0021445	16.712	7334622
PotVar0021417	16.7121	7336892
solcap_snp_c2_5227	16.7122	7337024
PotVar0021378	16.7123	7337449
PotVar0021338	16.7124	7345959
solcap_snp_c1_1918	16.7125	7599703
solcap_snp_c2_5290	16.7126	8263405
solcap_snp_c2_54674	16.7518	8390507
solcap_snp_c2_5287	16.8785	8564101
solcap_snp_c2_5286	16.8786	8564142
solcap_snp_c2_38503	17.6471	9158918
solcap_snp_c2_38504	17.6472	9160181
solcap_snp_c2_38515	17.6473	9163294
solcap_snp_c2_54530	18.2531	9358570
solcap_snp_c1_2039	18.4014	10245644
solcap_snp_c1_11979	19.1209	12886399
solcap_snp_c1_11985	19.2997	13104179
solcap_snp_c2_40739	19.4904	13115610
solcap_snp_c1_10555	19.4905	13393873
solcap_snp_c2_35563	19.4906	13505833
solcap_snp_c2_35553	19.4907	13562131
solcap_snp_c2_35552	19.4908	13584242
PotVar0132206	19.4909	13685682
solcap_snp_c2_35572	20.2111	13716066
solcap_snp_c1_11196	20.2112	13872519
solcap_snp_c1_11199	20.2113	13878085
solcap_snp_c1_11202	20.2114	13929679
solcap_snp_c2_37413	20.2115	13982156
PotVar0106441	20.2116	14142894
PotVar0106434	20.2117	14143097
PotVar0106352	20.2118	14146408
solcap_snp_c2_37429	20.2119	14203239
solcap_snp_c1_11177	20.212	14287866
solcap_snp_c1_11179	20.2121	14288172
solcap_snp_c1_11186	20.2122	14310931
solcap_snp_c2_37448	20.2331	14316903
solcap_snp_c2_54418	20.2572	14645855
solcap_snp_c1_15829	20.2785	14646478
solcap_snp_c2_54417	20.3046	14648637
solcap_snp_c1_15836	20.3288	14694930
solcap_snp_c1_11840	20.3529	14979685
solcap_snp_c2_39976	20.3737	15018564
solcap_snp_c2_39978	20.3945	15058471
solcap_snp_c2_39979	20.4166	15058800
solcap_snp_c1_11842	20.4376	15059129
solcap_snp_c1_11848	20.4377	15191927
solcap_snp_c1_3346	20.4378	15243506
solcap_snp_c2_10087	20.4379	15355001
solcap_snp_c1_3336	20.438	15367771
solcap_snp_c2_10088	20.4381	15654535
solcap_snp_c1_3347	20.6195	16008414
solcap_snp_c1_3348	20.6196	16008572
solcap_snp_c1_10725	21.4124	16833849
solcap_snp_c1_10726	21.4125	16840282
solcap_snp_c1_10734	21.4126	16843656
PotVar0121932	21.5633	16887160
PotVar0121928	21.5634	16887355
PotVar0121927	21.5635	16887361
solcap_snp_c1_10737	21.5636	16887518
solcap_snp_c2_36014	21.5637	16916022
solcap_snp_c1_10743	21.5638	16989140
solcap_snp_c1_16267	21.7559	17239217
solcap_snp_c2_659	22.4043	17668488
solcap_snp_c2_657	22.4044	17668710
solcap_snp_c2_654	22.5518	18019451
solcap_snp_c1_189	22.5519	18030172
solcap_snp_c2_650	22.552	18052848
solcap_snp_c2_649	22.5521	18052893
solcap_snp_c2_648	22.5522	18052994
solcap_snp_c2_646	22.5523	18855669
PotVar0019045	22.5524	18856346
solcap_snp_c2_644	22.5525	18972218
solcap_snp_c1_171	22.5526	19105081
solcap_snp_c2_634	22.5527	19893461
solcap_snp_c1_156	22.5528	20183296
solcap_snp_c2_676	22.5529	20218552
solcap_snp_c2_674	22.553	20219144
solcap_snp_c1_450	22.5531	21336716
solcap_snp_c1_456	22.5532	22177581
solcap_snp_c2_1929	22.7008	22533729
solcap_snp_c2_1930	22.7009	22534074
solcap_snp_c2_1933	22.701	22535369
solcap_snp_c2_11258	22.7011	22652204
solcap_snp_c1_3647	22.7012	22782440
PotVar0119336	22.7013	22937802
solcap_snp_c2_11272	22.7014	22942919
solcap_snp_c2_11271	22.7015	22942945
solcap_snp_c2_11270	22.7016	22942960
solcap_snp_c1_3662	22.7017	22982837
solcap_snp_c2_11269	22.7018	23155488
solcap_snp_c1_3659	22.7019	23295273
solcap_snp_c2_11267	22.702	23426848
solcap_snp_c2_11262	22.7021	23453620
solcap_snp_c2_37012	22.7258	24256930
solcap_snp_c2_37005	22.7259	24261459
solcap_snp_c2_41163	23.1423	31745504
solcap_snp_c1_13652	24.857	32080786
PotVar0080900	24.8571	32118215
solcap_snp_c2_41061	25.387	32759308
solcap_snp_c2_41058	25.3871	32828255
solcap_snp_c2_41056	25.3872	32828579
solcap_snp_c2_41055	25.3873	32856641
solcap_snp_c1_12069	25.3874	32856781
solcap_snp_c2_41071	25.3875	32950171
solcap_snp_c2_51096	25.7173	33393461
solcap_snp_c1_14973	25.7174	33464174
solcap_snp_c2_51091	25.7175	33470466
solcap_snp_c1_14975	25.7176	33475318
solcap_snp_c1_14982	25.7177	33475795
solcap_snp_c2_56635	25.7178	33495019
solcap_snp_c2_46408	25.7179	33876127
solcap_snp_c2_46405	25.718	33883504
solcap_snp_c2_56612	25.7181	34074210
solcap_snp_c2_43270	25.7182	34350488
solcap_snp_c2_43267	25.8782	34373409
solcap_snp_c2_43262	25.8815	34399858
solcap_snp_c2_43260	25.8816	34432191
solcap_snp_c2_43256	25.8817	34491679
solcap_snp_c1_12745	25.8818	34492320
solcap_snp_c2_43253	25.8819	34493653
solcap_snp_c1_12751	26.004	34637736
solcap_snp_c1_12749	26.2105	34638581
PotVar0085566	26.2106	35076412
solcap_snp_c2_54671	26.2107	35218601
solcap_snp_c1_16084	26.2108	35330258
solcap_snp_c2_55461	26.2109	35334498
solcap_snp_c2_55463	26.211	35335525
solcap_snp_c2_55464	26.2111	35337889
PotVar0085575	26.2336	35355770
PotVar0085644	26.3392	35358037
PotVar0085671	26.3393	35358657
PotVar0085672	26.3394	35358759
solcap_snp_c2_43165	26.3395	35563675
PotVar0085748	26.8331	35929360
PotVar0085760	26.8332	35929651
PotVar0085797	26.8333	35930786
PotVar0085799	26.8334	35930838
PotVar0085803	26.8335	35930909
solcap_snp_c2_35358	26.9804	35991675
solcap_snp_c2_35355	27.1248	36000522
solcap_snp_c2_35353	27.1249	36000878
solcap_snp_c1_15925	27.125	36151152
solcap_snp_c1_15926	27.1251	36151220
PotVar0131423	27.1252	36152577
solcap_snp_c2_54687	27.1253	36152649
PotVar0131468	27.2028	36154238
PotVar0094653	27.2871	36317851
PotVar0094680	27.2872	36318466
solcap_snp_c2_30741	27.6371	36334363
PotVar0094713	27.6372	36375449
PotVar0094787	27.6373	36380341
PotVar0094840	27.6374	36479874
PotVar0094857	27.6375	36482949
PotVar0094886	27.6376	36483563
PotVar0094922	27.6377	36484345
solcap_snp_c2_30730	27.7288	36484535
solcap_snp_c2_30690	27.8238	36654539
solcap_snp_c2_30685	27.8239	36657464
solcap_snp_c1_9268	27.824	36658149
solcap_snp_c1_4814	27.9944	36840643
solcap_snp_c2_55729	28.6875	36920317
solcap_snp_c2_57012	28.6876	36939832
solcap_snp_c2_49970	29.542	37121012
solcap_snp_c2_49976	29.5421	37167370
solcap_snp_c1_15343	30.0856	37485839
solcap_snp_c2_52494	30.0857	37495967
solcap_snp_c1_7133	30.0858	37678746
solcap_snp_c1_7139	30.0859	37699819
solcap_snp_c2_36463	30.5782	38085008
solcap_snp_c2_36466	30.897	38141607
solcap_snp_c2_36468	30.8971	38153740
solcap_snp_c2_36469	30.9735	38175099
solcap_snp_c1_10879	31.0446	38177443
PotVar0095271	31.0447	38203609
solcap_snp_c1_11350	31.3393	38435099
solcap_snp_c2_38047	31.6545	38662974
PotVar0095322	31.6546	38706980
PotVar0095330	31.7801	38707225
PotVar0095359	31.7802	38707513
PotVar0095435	31.7803	38711212
PotVar0095450	31.7804	38711501
solcap_snp_c2_38054	31.7805	38711501
PotVar0095451	32.2183	38711546
PotVar0095452	32.2184	38711603
PotVar0095473	32.2185	38718526
solcap_snp_c2_38058	32.2186	38756280
solcap_snp_c2_38068	32.5953	38758796
PotVar0129720	32.9449	39198462
solcap_snp_c2_48381	32.945	39198462
solcap_snp_c2_48378	32.9451	39198646
PotVar0129705	32.9452	39198794
PotVar0129687	32.9453	39199018
PotVar0129601	32.9454	39200456
solcap_snp_c1_14316	32.9456	39221780
PotVar0129579	33.2606	39255019
solcap_snp_c2_48371	33.5309	39255236
solcap_snp_c2_48370	33.675	39255317
solcap_snp_c2_48369	33.6751	39257162
solcap_snp_c2_48368	33.6752	39257271
solcap_snp_c2_48367	33.6753	39257352
solcap_snp_c2_48366	33.6754	39257411
solcap_snp_c2_48365	33.6755	39257459
solcap_snp_c2_48364	33.6756	39257577
PotVar0129496	33.6757	39257684
PotVar0129474	33.6758	39258061
PotVar0129442	33.6759	39258700
PotVar0129431	33.6797	39258923
PotVar0129430	33.8053	39259017
solcap_snp_c2_48360	33.8054	39259017
solcap_snp_c2_48359	33.8055	39259070
solcap_snp_c2_48390	33.8056	39312768
solcap_snp_c2_48389	33.8057	39312775
solcap_snp_c2_48388	33.9927	39313859
solcap_snp_c2_48387	33.9928	39314312
solcap_snp_c2_48386	33.9929	39314332
solcap_snp_c2_48385	33.993	39314387
solcap_snp_c2_37993	34.1815	40024360
solcap_snp_c1_16679	34.9888	40197844
solcap_snp_c2_37982	34.9889	40248445
solcap_snp_c1_11339	34.989	40339071
solcap_snp_c1_10514	37.2584	40768867
solcap_snp_c2_35234	37.2585	40992986
solcap_snp_c1_10519	38.0981	41056491
solcap_snp_c2_42306	38.4918	41324382
solcap_snp_c2_42299	39.3815	41464792
PotVar0115449	39.3816	41494317
PotVar0115487	39.3817	41495084
PotVar0115488	39.3818	41495142
PotVar0115519	39.3819	41495584
PotVar0115714	39.382	41527994
PotVar0115750	39.3821	41528993
solcap_snp_c2_42312	39.6949	41530089
PotVar0115783	39.695	41530418
solcap_snp_c2_24983	40.7984	41645779
solcap_snp_c1_7882	40.7985	41651732
solcap_snp_c2_57360	41.2219	41778945
solcap_snp_c2_57354	41.222	41779526
solcap_snp_c2_57349	41.2221	41780626
solcap_snp_c1_6869	41.5105	41992129
solcap_snp_c1_6875	41.5106	41994529
solcap_snp_c1_6850	41.9151	42019542
solcap_snp_c1_6851	41.966	42057000
solcap_snp_c1_6853	42.2075	42154551
PotVar0068174	42.6002	42232155
PotVar0068173	42.6003	42232267
PotVar0068165	42.6004	42232451
PotVar0068149	42.6005	42232927
PotVar0068140	42.6006	42233117
PotVar0068133	42.6007	42235028
solcap_snp_c1_6864	42.6008	42289087
solcap_snp_c2_56227	43.4424	42430875
solcap_snp_c1_9141	43.6108	42570907
PotVar0068036	43.6109	42895746
PotVar0067954	43.611	42896875
PotVar0067935	44.5756	42897873
solcap_snp_c1_9153	44.5757	42943917
solcap_snp_c1_9161	45.1383	43024161
solcap_snp_c2_46592	45.1384	43224595
solcap_snp_c2_45699	45.1385	43326576
solcap_snp_c2_45700	45.1386	43326700
solcap_snp_c2_45701	45.1387	43326802
solcap_snp_c2_45703	45.6497	43326982
solcap_snp_c1_13847	46.1972	43465296
solcap_snp_c1_13843	46.1973	43469293
solcap_snp_c2_46600	46.1974	43478349
solcap_snp_c2_46605	46.1975	43497910
solcap_snp_c2_46604	46.5563	43497970
solcap_snp_c2_46603	46.5564	43498325
solcap_snp_c1_4444	46.753	43602976
solcap_snp_c2_13825	46.7531	43632258
solcap_snp_c2_13854	46.7532	43779300
solcap_snp_c2_45507	46.7533	43884046
PotVar0070245	47.4952	43921219
PotVar0070254	47.4953	43921646
PotVar0070255	47.4954	43921700
PotVar0070258	47.4955	43921814
PotVar0070281	47.4956	43922329
PotVar0070298	47.8188	43937112
PotVar0070299	47.8189	43937160
PotVar0070310	47.819	43937346
solcap_snp_c2_17581	47.8191	44090353
solcap_snp_c1_5766	48.35	44217284
solcap_snp_c2_20347	49.5333	44336061
PotVar0113509	49.5334	44343336
PotVar0113506	49.5335	44343413
solcap_snp_c2_55471	49.5336	44512686
solcap_snp_c2_20309	49.5337	44661865
solcap_snp_c1_6349	49.7001	44675684
solcap_snp_c1_6352	50.5565	44751875
solcap_snp_c2_20333	50.8804	44828352
solcap_snp_c2_20351	51.6878	44971750
solcap_snp_c2_20358	51.6879	44973834
solcap_snp_c1_6398	51.688	45002749
solcap_snp_c1_6411	52.1443	45061263
solcap_snp_c1_6425	53.5365	45121807
solcap_snp_c1_6427	53.5366	45124521
PotVar0055399	53.5367	45178761
PotVar0055394	54.2225	45178926
PotVar0055393	54.2226	45178977
PotVar0055392	54.2227	45179064
PotVar0055381	54.2228	45179664
solcap_snp_c2_20428	54.2229	45252879
solcap_snp_c2_20433	54.223	45302180
solcap_snp_c2_55279	54.2231	45386107
solcap_snp_c2_55281	54.6192	45386371
solcap_snp_c2_55283	54.6193	45388663
solcap_snp_c2_55284	54.6194	45388822
solcap_snp_c2_55285	54.6195	45388939
solcap_snp_c2_25733	56.3294	45429376
solcap_snp_c1_8079	56.3295	45435790
solcap_snp_c1_8069	56.3296	45478753
PotVar0055362	56.3297	45603549
solcap_snp_c2_25653	56.3298	45603698
PotVar0055343	56.3299	45604002
PotVar0055302	56.33	45605550
PotVar0055208	56.3301	45608725
PotVar0055172	56.3302	45609312
PotVar0055130	56.3303	45610001
PotVar0055081	56.3304	45611360
PotVar0055003	56.3305	45612140
solcap_snp_c1_8059	56.3306	45686390
solcap_snp_c1_8058	56.6984	45686495
solcap_snp_c1_8036	56.8233	45805462
solcap_snp_c2_25560	56.8234	45904981
PotVar0054986	56.8235	45938967
PotVar0054983	57.1025	45938997
PotVar0054967	57.1026	45939339
PotVar0054962	57.1027	45939471
solcap_snp_c2_25662	57.103	45979293
solcap_snp_c2_25576	57.2901	46007735
solcap_snp_c2_2132	57.2902	46234638
solcap_snp_c2_2137	57.6716	46265419
solcap_snp_c2_2138	57.6717	46265431
solcap_snp_c1_526	57.6718	46395963
solcap_snp_c2_57860	57.7962	46423001
solcap_snp_c2_57865	57.7963	46423346
PotVar0042829	57.7964	46450199
PotVar0042846	57.7965	46454815
PotVar0042853	57.7966	46457572
PotVar0042906	57.7967	46459743
PotVar0042930	58.3241	46460236
solcap_snp_c2_11244	58.3242	46474529
solcap_snp_c1_3639	58.3243	46475184
solcap_snp_c1_3638	58.3244	46475259
solcap_snp_c2_11224	58.3245	46481324
solcap_snp_c2_11211	58.3246	46528226
solcap_snp_c2_11162	59.6904	46718856
solcap_snp_c2_11147	59.6905	46806099
solcap_snp_c2_29669	60.055	46912690
PotVar0042948	60.0761	46922014
solcap_snp_c2_29665	60.0762	46924861
solcap_snp_c1_9014	60.0763	47073242
solcap_snp_c2_29643	60.0764	47076266
solcap_snp_c2_29642	60.4151	47076475
solcap_snp_c2_29639	60.4152	47076714
solcap_snp_c2_54785	60.6841	47137231
solcap_snp_c2_29628	61.2841	47155647
solcap_snp_c2_29602	61.6892	47268384
PotVar0043186	61.6893	47314837
PotVar0043187	61.7812	47314855
PotVar0043196	61.7813	47314969
PotVar0043207	61.7814	47315129
solcap_snp_c1_8998	61.7815	47331243
solcap_snp_c1_8997	62.1702	47331257
solcap_snp_c2_29513	62.4414	47493308
solcap_snp_c2_29690	62.4415	47500847
solcap_snp_c2_29678	62.4416	47553804
solcap_snp_c2_45896	62.6468	47705038
PotVar0043238	62.6469	47705782
solcap_snp_c1_13616	62.647	47705782
PotVar0043245	63.2213	47705954
PotVar0043256	63.2214	47706256
solcap_snp_c2_45914	63.4861	47769763
solcap_snp_c2_53699	63.4862	48017163
solcap_snp_c2_55072	63.4863	48087983
solcap_snp_c2_55071	63.4864	48088013
solcap_snp_c2_48529	64.0002	48343451
PotVar0120189	64.0003	48350517
PotVar0120191	64.0004	48350529
PotVar0120195	64.0005	48350669
PotVar0120252	64.0006	48358184
PotVar0120279	64.0007	48358632
PotVar0120301	64.0008	48359023
PotVar0120314	64.2544	48364373
PotVar0120323	64.2545	48364457
PotVar0120373	64.2546	48365020
PotVar0120444	64.2547	48365868
PotVar0120484	65.1021	48467370
PotVar0120488	65.1022	48467458
PotVar0120531	65.2601	48467963
PotVar0120553	65.2602	48468215
PotVar0120554	65.2603	48468262
PotVar0120560	65.2604	48468496
solcap_snp_c1_6298	65.2605	48470944
solcap_snp_c2_20077	65.2606	48482692
PotVar0120592	65.8844	48549559
PotVar0120595	65.8845	48549582
PotVar0120600	66.2235	48550087
solcap_snp_c1_6308	66.408	48746307
solcap_snp_c2_20124	66.5144	48747525
solcap_snp_c2_20129	66.5145	48762278
solcap_snp_c2_20135	66.5146	48764500
PotVar0121615	66.5147	48785915
PotVar0121654	66.5148	48786391
PotVar0121802	66.5149	48792127
PotVar0121803	66.515	48792166
solcap_snp_c2_20170	67.5074	48911771
solcap_snp_c2_20175	67.5075	48939759
solcap_snp_c2_20176	67.5076	48939821
solcap_snp_c2_20179	67.5077	48943944
solcap_snp_c2_20203	67.5078	49140532
solcap_snp_c2_20227	67.5079	49231930
PotVar0070550	67.8491	49236874
PotVar0070532	67.8492	49237267
PotVar0070449	67.8493	49238938
PotVar0070435	67.8494	49239941
PotVar0070335	67.8495	49245899
solcap_snp_c1_6332	67.8496	49245954
solcap_snp_c2_20259	68.16	49317882
solcap_snp_c2_20273	68.4136	49358645
solcap_snp_c2_20274	68.4137	49358697
solcap_snp_c2_20282	69.3705	49393157
solcap_snp_c1_13494	69.3706	49839804
solcap_snp_c1_5774	69.3707	49941568
PotVar0056921	69.3708	50225873
PotVar0056918	69.3709	50225936
PotVar0056887	69.371	50226398
PotVar0056881	69.3711	50226521
solcap_snp_c2_58296	69.7015	50294881
PotVar0056835	69.702	50310138
solcap_snp_c2_1616	69.9901	50350319
solcap_snp_c2_1603	70.2231	50404132
solcap_snp_c2_1579	70.3498	50455611
solcap_snp_c2_1567	70.3499	50490035
solcap_snp_c2_1556	71.2737	50573479
solcap_snp_c2_1533	71.5163	50688268
solcap_snp_c2_1890	72.3485	50748191
PotVar0056641	72.5113	50879724
PotVar0056554	72.5114	50882706
PotVar0056453	72.5115	50886369
PotVar0056380	72.5116	50887071
PotVar0056354	72.5117	50887414
PotVar0056297	72.5118	50888047
PotVar0056273	72.6882	50890271
PotVar0056260	72.6883	50890417
PotVar0056240	72.6884	50890699
PotVar0056231	72.971	50890774
PotVar0056200	72.9711	50958101
solcap_snp_c1_439	72.9724	50959945
PotVar0056019	72.9725	50960638
PotVar0056016	72.9726	50960772
PotVar0055978	73.1719	50963564
solcap_snp_c1_432	73.172	51038140
PotVar0055916	73.1721	51057753
PotVar0055885	73.1722	51058073
PotVar0055804	73.3446	51237828
PotVar0055776	73.3447	51238952
PotVar0055756	73.3448	51239351
solcap_snp_c2_1813	73.3449	51282166
solcap_snp_c2_1791	73.5118	51348317
solcap_snp_c2_1790	73.705	51349198
solcap_snp_c2_1722	73.9637	51404309
solcap_snp_c2_1720	73.9638	51404520
solcap_snp_c2_1719	73.9639	51404549
solcap_snp_c2_1718	73.964	51404622
solcap_snp_c2_1688	74.4094	51474620
solcap_snp_c2_1671	74.4429	51534643
solcap_snp_c1_398	74.7574	51601574
PotVar0055722	74.9516	51601612
PotVar0055694	74.9517	51601971
PotVar0055692	74.9518	51602014
PotVar0055562	74.9519	51605802
PotVar0055556	75.226	51605866
solcap_snp_c2_47583	75.2261	51936288
solcap_snp_c2_47510	75.8856	51972224
solcap_snp_c2_47522	76.0867	52011883
solcap_snp_c2_14139	77.2085	52229152
solcap_snp_c2_14162	78.3669	52230281
solcap_snp_c2_13987	79.4215	52483910
solcap_snp_c2_14017	80.1476	52546341
solcap_snp_c2_14044	80.1477	52585314
solcap_snp_c2_14064	80.5448	52657949
solcap_snp_c2_14155	81.3986	52909720
PotVar0027569	81.7687	52980113
PotVar0027486	81.7688	52981324
PotVar0027439	81.7689	52982189
PotVar0027438	81.7709	52982197
solcap_snp_c1_4577	82.6699	53162686
solcap_snp_c2_14258	83.0635	53203226
solcap_snp_c2_17648	83.5442	53227622
solcap_snp_c2_17644	83.5443	53228558
solcap_snp_c1_16234	83.5444	53270167
solcap_snp_c2_55882	83.5445	53272697
solcap_snp_c2_55885	83.5446	53279728
solcap_snp_c2_17631	83.5447	53309062
solcap_snp_c2_57260	83.5448	53421920
solcap_snp_c2_57254	83.5449	53433832
solcap_snp_c2_57256	83.545	53434069
solcap_snp_c2_57257	83.5451	53434144
solcap_snp_c2_57258	83.5452	53434206
solcap_snp_c1_16513	83.5453	53436559
solcap_snp_c2_17667	83.5454	53549043
solcap_snp_c1_5812	83.7642	53665337
PotVar0029727	85.5659	53738787
PotVar0029748	85.566	53739234
PotVar0029749	85.7267	53739262
PotVar0029756	85.7268	53739320
PotVar0029778	85.7269	53739712
PotVar0029781	85.8069	53739740
PotVar0029800	85.9591	53740092
solcap_snp_c2_17737	85.9592	53747981
solcap_snp_c1_14159	86.7196	53970990
solcap_snp_c1_7132	87.1206	54314873
solcap_snp_c2_22431	87.1207	54351159
solcap_snp_c1_7096	87.1208	54469809
PotVar0029964	87.1209	54538909
solcap_snp_c1_7111	87.121	54582047
solcap_snp_c2_22512	90.5576	54971939
solcap_snp_c2_18409	91.2562	55107094
solcap_snp_c2_18268	91.8918	55234591
solcap_snp_c2_18269	91.8919	55234622
solcap_snp_c2_18308	91.892	55291392
PotVar0030243	92.1589	55343622
solcap_snp_c1_5951	93.1186	55454889
solcap_snp_c2_18482	93.8239	55883276
solcap_snp_c2_26474	94.3179	56382228
PotVar0121124	94.318	56388067
PotVar0121139	94.3181	56388233
PotVar0121169	94.3182	56388617
PotVar0121201	94.3183	56389088
PotVar0121290	94.3184	56390202
PotVar0121292	95.1672	56390265
PotVar0121309	95.5581	56390457
PotVar0121310	95.806	56390487
solcap_snp_c2_26454	95.8061	56440455
PotVar0121351	96.4175	56499431
PotVar0121379	96.4176	56499714
PotVar0121437	96.4177	56501638
PotVar0121441	96.4178	56501711
PotVar0121488	96.4353	56506956
PotVar0121499	97.1393	56507095
solcap_snp_c2_26403	97.1394	56604220
solcap_snp_c2_26402	97.5236	56604264
solcap_snp_c2_26382	97.5237	56661756
solcap_snp_c2_26369	98.1079	56678558
PotVar0013242	98.108	56932286
PotVar0013337	99.0451	56983527
PotVar0013345	99.0452	56983590
PotVar0013382	99.0453	56983916
solcap_snp_c1_111	100.337	57295688
solcap_snp_c1_110	100.337	57295958
solcap_snp_c2_429	100.337	57296129
solcap_snp_c2_422	100.337	57311835
PotVar0013433	100.337	57311919
solcap_snp_c2_400	100.599	57405135
solcap_snp_c1_108	100.599	57407195
solcap_snp_c2_397	100.599	57407387
solcap_snp_c2_394	100.599	57407502
solcap_snp_c2_393	100.599	57407540
solcap_snp_c2_392	100.599	57407570
solcap_snp_c2_390	100.6	57407744
solcap_snp_c2_388	100.6	57407825
solcap_snp_c2_387	101.056	57407879
PotVar0013479	101.056	57498280
PotVar0013496	101.056	57498526
PotVar0013510	101.056	57498766
PotVar0013533	101.056	57500277
PotVar0013550	101.056	57500599
PotVar0013573	101.056	57501461
PotVar0013632	101.056	57502252
PotVar0013695	101.112	57502991
solcap_snp_c2_328	101.407	57566842
solcap_snp_c2_327	101.407	57566866
PotVar0013766	101.417	57567139
solcap_snp_c1_99	101.892	57567480
PotVar0013816	102.57	57568392
solcap_snp_c2_326	102.57	57568936
solcap_snp_c2_325	102.638	57568965
PotVar0013850	102.638	57569002
PotVar0013851	102.638	57569036
solcap_snp_c2_324	102.638	57569155
solcap_snp_c1_97	102.638	57569263
PotVar0013867	102.638	57569466
PotVar0013873	102.638	57569599
solcap_snp_c2_322	102.638	57569599
solcap_snp_c2_308	103.282	57601387
PotVar0013907	103.659	57603283
solcap_snp_c1_95	103.659	57610813
solcap_snp_c2_304	103.762	57615162
solcap_snp_c2_295	103.763	57635783
solcap_snp_c2_293	103.763	57638065
solcap_snp_c2_292	103.763	57644668
solcap_snp_c2_283	103.917	57673087
solcap_snp_c2_282	103.917	57676310
solcap_snp_c2_268	104.313	57736418
solcap_snp_c2_265	104.313	57772073
solcap_snp_c2_264	104.314	57776244
solcap_snp_c2_262	104.511	57803258
solcap_snp_c2_261	104.511	57803336
solcap_snp_c2_255	104.511	57829052
solcap_snp_c2_247	104.512	57872050
solcap_snp_c2_245	104.512	57875508
solcap_snp_c2_244	104.512	57878306
solcap_snp_c2_242	104.775	57897044
PotVar0014012	104.775	57898035
PotVar0014025	105.032	57898350
solcap_snp_c2_235	105.032	57932508
solcap_snp_c1_87	105.032	57978297
solcap_snp_c2_205	105.296	58042916
solcap_snp_c2_204	105.296	58056215
solcap_snp_c2_203	105.296	58060482
solcap_snp_c2_200	105.296	58069073
solcap_snp_c2_199	105.479	58081911
solcap_snp_c2_196	105.479	58089501
solcap_snp_c2_185	105.479	58106851
solcap_snp_c1_77	105.479	58126266
solcap_snp_c1_75	105.479	58131911
solcap_snp_c2_178	105.479	58144129
solcap_snp_c1_73	105.479	58144738
solcap_snp_c2_161	107.973	58208074
solcap_snp_c2_160	107.973	58211090
solcap_snp_c2_158	107.973	58212336
solcap_snp_c2_149	107.973	58286131
solcap_snp_c2_148	107.973	58295011
solcap_snp_c2_147	107.973	58295126
solcap_snp_c2_145	107.973	58297857
solcap_snp_c2_137	107.974	58306150
solcap_snp_c2_133	107.974	58322172
solcap_snp_c2_129	107.974	58339114
solcap_snp_c2_126	108.616	58374503
solcap_snp_c2_117	109.341	58417278
solcap_snp_c2_113	109.865	58426685
solcap_snp_c1_58	109.869	58455206
solcap_snp_c2_109	109.869	58465202
solcap_snp_c2_107	110.121	58507293
PotVar0014064	110.659	58519761
solcap_snp_c2_99	110.659	58520073
PotVar0014072	110.659	58520144
solcap_snp_c1_52	110.758	58524323
solcap_snp_c1_51	110.758	58529984
solcap_snp_c2_93	111.463	58595688
solcap_snp_c2_92	111.463	58599015
solcap_snp_c1_42	111.463	58601348
solcap_snp_c1_41	111.463	58601481
solcap_snp_c1_39	111.463	58607378
solcap_snp_c1_38	111.463	58609665
solcap_snp_c1_36	111.464	58609796
solcap_snp_c2_86	111.464	58611092
solcap_snp_c2_85	111.464	58611143
solcap_snp_c2_68	111.599	58651016
solcap_snp_c1_26	111.599	58658366
solcap_snp_c2_626	112.882	58859854
solcap_snp_c2_625	112.882	58867880
solcap_snp_c2_624	112.882	58869126
solcap_snp_c2_622	112.883	58876505
solcap_snp_c2_616	112.883	58877163
solcap_snp_c1_151	113.434	58944486
solcap_snp_c2_610	113.434	58953083
solcap_snp_c2_609	113.434	58953209
solcap_snp_c2_608	113.434	58969812
solcap_snp_c2_606	113.434	58973770
solcap_snp_c2_603	113.435	58975136
solcap_snp_c2_601	113.435	58983419
solcap_snp_c2_598	114.593	59021888
solcap_snp_c1_146	114.593	59029495
solcap_snp_c1_140	114.593	59030306
solcap_snp_c2_597	114.721	59068776
solcap_snp_c2_596	114.721	59074729
solcap_snp_c2_595	114.721	59074842
solcap_snp_c1_137	114.847	59094965
solcap_snp_c2_589	115.105	59108973
solcap_snp_c2_587	115.105	59109439
PotVar0014097	116.657	59163522
PotVar0014106	116.657	59163731
solcap_snp_c2_574	116.728	59189834
solcap_snp_c2_573	116.98	59217555
solcap_snp_c2_570	116.981	59238869
solcap_snp_c2_569	116.981	59241688
solcap_snp_c2_556	118.066	59295544
solcap_snp_c2_555	118.511	59316297
solcap_snp_c1_126	118.511	59316627
solcap_snp_c2_542	119.059	59441081
solcap_snp_c2_541	119.059	59441720
solcap_snp_c2_540	119.237	59445428
solcap_snp_c2_538	119.237	59445767
solcap_snp_c2_533	119.238	59468320
solcap_snp_c2_457	119.238	59481669
solcap_snp_c2_381	119.238	59501479
solcap_snp_c2_357	119.238	59507705
solcap_snp_c2_190	120.376	59568484
solcap_snp_c2_164	120.376	59574996
solcap_snp_c2_163	120.376	59575338
solcap_snp_c2_130	120.376	59591524
solcap_snp_c2_115	120.376	59600128
PotVar0014151	120.377	59609498
PotVar0014217	120.377	59611512
solcap_snp_c2_243	120.377	59731204
solcap_snp_c2_536	120.377	59740878
solcap_snp_c1_131	120.377	59764345
solcap_snp_c2_578	120.377	59769294
solcap_snp_c2_55684	120.377	59830747
solcap_snp_c2_55664	120.377	59839677
solcap_snp_c2_55675	120.377	59847744
solcap_snp_c2_9553	120.377	59890729
solcap_snp_c2_9557	120.378	59893733
solcap_snp_c2_9611	120.556	59919791
solcap_snp_c2_9627	120.556	59933404
solcap_snp_c2_9629	120.556	59933563
PotVar0021209	120.556	59953742
solcap_snp_c1_3189	120.556	59982651
solcap_snp_c1_3191	120.556	59982780
solcap_snp_c2_9537	120.556	60013660
solcap_snp_c2_9551	120.556	60048338
solcap_snp_c2_9562	120.779	60123330
solcap_snp_c2_9563	120.779	60125718
solcap_snp_c2_9565	120.779	60125973
solcap_snp_c2_9566	120.779	60137054
solcap_snp_c2_9569	120.909	60155881
solcap_snp_c2_9571	120.909	60160433
solcap_snp_c2_9577	120.91	60167798
solcap_snp_c2_9578	120.91	60168656
solcap_snp_c2_9582	120.91	60180521
solcap_snp_c2_9589	120.91	60190975
solcap_snp_c2_9590	120.91	60191065
solcap_snp_c2_9593	120.91	60198990
solcap_snp_c2_9594	120.91	60203560
solcap_snp_c2_9600	121.133	60270147
solcap_snp_c2_9602	121.133	60278252
solcap_snp_c2_9604	121.328	60280934
solcap_snp_c2_9630	122.697	60491901
PotVar0021187	122.697	60491938
PotVar0021182	122.697	60492126
PotVar0021180	122.697	60492180
PotVar0021171	122.697	60492622
PotVar0021166	122.697	60492716
PotVar0021136	122.86	60493589
PotVar0021132	122.86	60493682
PotVar0021118	122.861	60494697
PotVar0021098	123.764	60495054
PotVar0021026	124.639	60658941
PotVar0021019	124.639	60659064
PotVar0020971	125.576	60843223
solcap_snp_c1_3193	125.576	60880131
solcap_snp_c2_9497	125.959	60937507
solcap_snp_c2_9498	126.14	60937578
solcap_snp_c2_9531	126.14	61035987
PotVar0020808	129.392	61233873
PotVar0020802	129.392	61234155
PotVar0020782	129.393	61267788
PotVar0020716	129.393	61269164
PotVar0020566	130.145	61416044
PotVar0020552	130.145	61417010
PotVar0020413	130.145	61494421
PotVar0020407	131.13	61494613
solcap_snp_c2_40435	131.263	61548066
PotVar0020225	131.263	61551606
PotVar0020216	131.263	61551841
PotVar0020213	131.263	61551897
solcap_snp_c2_49090	134.157	61719288
solcap_snp_c2_37146	134.157	61757458
PotVar0020111	134.459	61794151
solcap_snp_c2_37139	134.459	61794475
solcap_snp_c2_37137	134.459	61796656
PotVar0020074	134.459	61796793
solcap_snp_c2_37136	134.459	61796934
solcap_snp_c2_37123	134.459	61870684
solcap_snp_c2_37121	135.014	61872439
solcap_snp_c2_37119	135.165	61874817
PotVar0020017	135.165	61892531
PotVar0019945	135.165	61896957
solcap_snp_c2_37116	135.165	61899146
solcap_snp_c2_37115	135.166	61899241
PotVar0019908	135.166	61907408
PotVar0019891	135.166	61908131
PotVar0019861	135.475	61965626
PotVar0019800	135.475	61992846
solcap_snp_c1_16472	136.573	62033001
solcap_snp_c2_56824	136.573	62269671

## Sheet: chr4
Supplementary Table 3. Molecular markers linkage map of chromosome 4.
Marker	Position (cM)	Physical Position
solcap_snp_c2_50942	0	2572452
solcap_snp_c2_29872	0.196131	2714003
PotVar0076876	0.196231	2719940
PotVar0076875	0.196331	2719958
PotVar0076872	0.196431	2720066
PotVar0076830	0.196531	2720368
PotVar0076771	0.196631	2720900
PotVar0076761	0.196731	2721075
solcap_snp_c2_29851	0.196831	3127465
solcap_snp_c1_16358	0.86155	3240076
PotVar0076672	1.06903	3257792
PotVar0076666	1.06913	3257903
PotVar0076654	1.06923	3258142
PotVar0076628	1.06933	3258554
PotVar0076616	1.06943	3258767
solcap_snp_c1_13626	1.06953	3500991
PotVar0076511	2.65709	3547887
PotVar0076504	2.65719	3547996
PotVar0076503	2.65729	3548000
PotVar0076499	2.65739	3548052
solcap_snp_c2_31673	3.27534	3805809
solcap_snp_c2_31688	3.27544	3816447
solcap_snp_c2_31712	3.56556	3872265
solcap_snp_c2_31716	3.56566	3887404
PotVar0107012	3.8808	3902276
PotVar0107010	3.8809	3902338
PotVar0107009	3.881	3902342
PotVar0106999	3.9851	3902642
solcap_snp_c2_31719	3.98587	3903824
PotVar0106922	3.98647	3905183
solcap_snp_c1_9546	3.98657	3905183
PotVar0106917	3.98667	3905319
PotVar0106885	3.98677	3916165
PotVar0106879	3.98687	3916249
PotVar0106871	3.98697	3916381
PotVar0106865	3.98707	3916471
PotVar0106851	3.98717	3916696
PotVar0106843	3.98727	3916814
solcap_snp_c2_31732	3.98737	3924918
solcap_snp_c2_31733	3.98747	3926768
PotVar0106834	4.34791	3995492
PotVar0106745	4.34801	3999225
PotVar0106736	4.66167	3999348
PotVar0106655	4.66177	4000403
PotVar0106625	4.66187	4000681
PotVar0106538	4.66197	4001375
solcap_snp_c2_7751	4.78779	4012716
PotVar0100767	5.61387	4578802
PotVar0100770	5.61397	4578820
PotVar0100789	5.61407	4578975
PotVar0100817	5.61417	4579575
PotVar0100820	5.61427	4579602
PotVar0100824	5.61437	4579676
PotVar0100851	5.61447	4580587
PotVar0100912	5.61457	4581070
solcap_snp_c1_6898	5.61467	4586164
solcap_snp_c2_21934	5.61477	4606550
solcap_snp_c2_21930	6.98522	4770130
PotVar0100916	7.08259	4782083
PotVar0100919	7.08269	4782174
PotVar0100930	7.08279	4782350
PotVar0100941	7.08289	4782538
PotVar0100946	7.08299	4782583
PotVar0100955	7.08309	4782727
PotVar0100990	7.20046	4783232
PotVar0101034	7.47491	4783575
PotVar0101048	7.47501	4783732
PotVar0101072	7.47511	4786632
solcap_snp_c2_21926	7.47521	4808886
solcap_snp_c2_21915	7.47531	4821112
solcap_snp_c1_6890	7.47541	4832664
solcap_snp_c2_21896	7.88641	4903359
PotVar0101164	7.88651	4917459
PotVar0101166	7.88661	4917586
PotVar0101281	7.88671	4918618
PotVar0101301	7.88681	4918738
PotVar0101323	8.15453	4918953
PotVar0101345	8.15463	4919161
solcap_snp_c2_21875	8.15473	4943303
solcap_snp_c2_21867	8.15483	4948774
solcap_snp_c2_21860	8.15493	4957793
solcap_snp_c1_6894	8.93408	5184165
solcap_snp_c2_21858	8.93418	5205905
solcap_snp_c2_55387	9.81832	5421954
solcap_snp_c1_16079	9.84639	5435822
solcap_snp_c1_16080	9.84649	5453095
solcap_snp_c2_51637	9.84659	5488531
solcap_snp_c2_51638	9.84669	5488574
solcap_snp_c2_51639	9.84679	5488735
solcap_snp_c2_51641	9.84689	5489011
solcap_snp_c1_15106	9.84699	5513361
solcap_snp_c2_51647	9.84709	5521580
solcap_snp_c2_51650	9.84719	5603404
solcap_snp_c1_3740	9.84729	6178872
solcap_snp_c2_11571	10.4654	6209862
solcap_snp_c2_11570	10.4655	6210340
solcap_snp_c2_11569	10.4656	6210370
solcap_snp_c2_11568	10.4657	6210397
solcap_snp_c2_11564	10.6552	6297654
PotVar0109537	10.8165	6339007
PotVar0109529	10.8166	6339071
PotVar0109426	11.2186	6339871
solcap_snp_c2_11549	11.2187	6380666
solcap_snp_c2_11534	11.816	6614553
solcap_snp_c1_3707	11.8161	6717567
solcap_snp_c2_11488	12.4412	6958789
solcap_snp_c2_11487	12.4413	6960381
solcap_snp_c2_11479	12.4414	6978730
solcap_snp_c2_11435	13.7902	7041420
solcap_snp_c2_11425	13.7903	7122790
PotVar0127881	13.7904	7129936
PotVar0127851	13.7905	7130302
PotVar0127732	14.1692	7131399
solcap_snp_c2_11516	14.4406	7368483
solcap_snp_c2_48868	15.5145	7546115
solcap_snp_c2_48866	15.5146	7546310
solcap_snp_c2_48864	15.5147	7546471
solcap_snp_c2_39718	15.5148	7898214
solcap_snp_c1_11723	15.5149	7966239
solcap_snp_c1_11722	15.7362	7966312
solcap_snp_c1_11709	15.7363	8016002
solcap_snp_c2_39606	15.7364	8016281
solcap_snp_c2_39624	15.7365	8060573
solcap_snp_c2_39590	15.7366	8176305
solcap_snp_c2_39593	16.3419	8209896
solcap_snp_c2_39597	16.457	8218478
PotVar0039587	17.1422	8361963
PotVar0039588	17.1423	8362017
PotVar0039621	17.1424	8362490
solcap_snp_c2_47320	17.1425	8413993
solcap_snp_c2_42863	17.1426	8712928
solcap_snp_c1_8353	18.835	9203540
solcap_snp_c1_8341	18.8351	9262447
solcap_snp_c2_26773	18.8352	9276426
solcap_snp_c1_8344	18.8353	9315557
solcap_snp_c2_26779	18.8354	9324535
solcap_snp_c2_26780	18.8355	9324622
solcap_snp_c2_26790	19.0686	9520486
solcap_snp_c2_26792	19.0687	9523209
solcap_snp_c1_8346	19.0688	9523734
solcap_snp_c2_26793	19.0689	9524196
solcap_snp_c2_26796	19.069	9524541
solcap_snp_c2_26797	19.0691	9524613
solcap_snp_c2_26801	19.0692	9525367
solcap_snp_c2_26802	19.0693	9525557
solcap_snp_c2_26811	19.0694	9588125
solcap_snp_c2_26812	19.1696	9590925
solcap_snp_c2_26826	19.1697	9648247
solcap_snp_c2_26837	19.4524	9727816
solcap_snp_c2_26838	19.4525	9733963
solcap_snp_c2_26842	19.813	9747341
solcap_snp_c2_26843	19.8131	9747383
solcap_snp_c1_8354	19.8132	9787340
solcap_snp_c2_53784	19.8133	9941194
solcap_snp_c2_53783	19.8472	9941214
solcap_snp_c2_58200	19.9635	10010810
solcap_snp_c2_44601	19.9636	10102877
solcap_snp_c2_44609	20.2561	10132935
solcap_snp_c2_44620	20.7034	10138395
solcap_snp_c1_16258	21.2478	10390793
solcap_snp_c2_31403	21.5548	10567963
solcap_snp_c2_53771	21.5596	10675173
solcap_snp_c2_54077	21.8337	10968547
solcap_snp_c2_54090	22.2826	10993507
solcap_snp_c1_16643	22.2827	11108454
PotVar0091963	22.5873	11175955
PotVar0091972	22.5874	11176079
PotVar0092188	22.8778	11199167
PotVar0092202	22.8779	11199749
solcap_snp_c2_37325	23.0377	11355307
solcap_snp_c2_37323	23.0378	11363362
solcap_snp_c1_11132	23.0379	11388697
solcap_snp_c2_51176	23.3411	11654120
solcap_snp_c2_51192	23.3412	11654947
solcap_snp_c2_51190	23.3413	11655289
solcap_snp_c2_38729	23.3414	12136285
solcap_snp_c2_51549	23.5044	12313706
solcap_snp_c1_15085	23.5045	12328283
PotVar0121030	23.5046	12331857
PotVar0121092	23.5047	12333208
solcap_snp_c2_51560	23.5048	12333285
solcap_snp_c2_56253	23.5049	12425752
solcap_snp_c2_56254	23.505	12425763
solcap_snp_c2_56255	23.5051	12425807
solcap_snp_c2_56256	23.5052	12425864
solcap_snp_c2_56257	23.68	12428259
solcap_snp_c2_56250	23.6801	12430221
solcap_snp_c2_56251	23.6802	12430239
solcap_snp_c2_29469	23.8458	14695759
solcap_snp_c2_29472	23.8459	14705976
solcap_snp_c2_29476	23.846	14748259
solcap_snp_c1_8983	23.8461	14749443
solcap_snp_c1_8982	23.8462	14749556
solcap_snp_c2_56052	23.8463	19953880
solcap_snp_c1_16263	23.8464	19955846
solcap_snp_c1_16261	23.8515	19955997
solcap_snp_c1_11406	23.8564	21441241
solcap_snp_c2_38243	23.8616	21716528
solcap_snp_c2_38242	23.8674	21718414
solcap_snp_c2_21604	23.8675	22069806
solcap_snp_c2_21605	23.8676	22069845
solcap_snp_c2_21595	23.8677	22322258
PotVar0008090	23.8678	22837788
PotVar0008082	23.8679	22838328
PotVar0008075	23.868	22838778
PotVar0008065	23.8681	22838987
solcap_snp_c2_18225	23.8682	22839538
solcap_snp_c2_18223	23.8683	22839744
solcap_snp_c2_18221	23.8684	23107795
solcap_snp_c2_54709	23.8685	23511256
solcap_snp_c2_21301	23.8686	24776703
solcap_snp_c2_48073	23.8687	25020860
solcap_snp_c2_48074	23.8688	25021008
solcap_snp_c2_55708	24.3159	25320525
solcap_snp_c2_2864	24.316	26533796
solcap_snp_c1_860	24.3161	26534588
solcap_snp_c2_36810	24.5095	28830574
PotVar0073629	24.5096	28846598
PotVar0073639	24.5097	28846964
PotVar0073716	24.5098	28848091
PotVar0073718	24.5099	28848174
PotVar0073731	24.51	28849098
PotVar0073742	24.5101	28849480
PotVar0073743	24.5102	28849542
PotVar0073752	24.5103	28849755
PotVar0073760	24.6348	28849842
solcap_snp_c2_32912	24.6349	28988078
solcap_snp_c2_32900	24.635	28997907
solcap_snp_c2_32901	24.6351	28997918
solcap_snp_c2_32904	24.6352	29010157
solcap_snp_c2_32906	24.6353	29011184
solcap_snp_c2_32908	24.6354	29011975
solcap_snp_c1_9839	24.6355	29012970
solcap_snp_c2_43765	24.6356	29609313
solcap_snp_c1_12888	24.6357	29636864
solcap_snp_c2_47103	24.6358	29850298
solcap_snp_c2_47105	24.6359	29866344
PotVar0007753	24.7356	30716340
solcap_snp_c1_6157	24.7357	30716444
PotVar0007740	24.7358	30717225
PotVar0007732	24.7359	30717354
PotVar0007623	24.855	30721132
solcap_snp_c1_9476	24.8551	30812992
solcap_snp_c2_31361	24.9645	31160462
solcap_snp_c2_31360	24.9646	31162129
solcap_snp_c2_31359	24.9647	31162231
solcap_snp_c2_31358	24.9648	31162267
solcap_snp_c1_9477	24.9649	31226172
solcap_snp_c2_10437	24.965	32227924
solcap_snp_c2_10461	25.0711	32402750
solcap_snp_c2_10460	25.0712	32402884
solcap_snp_c1_3445	25.1545	32532781
solcap_snp_c2_10452	25.2994	32552021
solcap_snp_c2_10449	25.2995	32697197
solcap_snp_c1_3444	25.3949	32777626
solcap_snp_c1_3443	25.4	32779431
PotVar0009120	25.4001	33100604
PotVar0009111	25.4002	33100705
solcap_snp_c2_10443	25.4003	33160548
solcap_snp_c2_10442	25.4004	33161769
solcap_snp_c2_57338	25.4005	33265976
solcap_snp_c1_14569	25.4006	33473330
solcap_snp_c2_58366	26.165	34230472
solcap_snp_c2_37596	26.1651	34826609
PotVar0014877	26.1652	35706012
PotVar0014872	26.1653	35706045
solcap_snp_c2_41107	26.1654	35757940
solcap_snp_c2_41106	26.1655	35757952
solcap_snp_c2_41105	26.1656	35760614
solcap_snp_c2_19422	26.1657	36304229
solcap_snp_c1_8368	26.1658	37632181
solcap_snp_c1_8369	26.1659	37642845
solcap_snp_c1_13125	26.166	37992737
solcap_snp_c2_26888	26.1661	38495025
PotVar0125776	26.1662	40735450
solcap_snp_c2_47243	26.1663	41061613
solcap_snp_c1_14038	26.1664	41063555
solcap_snp_c1_14039	26.1665	41063770
solcap_snp_c1_14709	26.1666	42023689
solcap_snp_c2_49991	26.1667	42024648
solcap_snp_c2_49995	26.1668	42033246
solcap_snp_c2_19425	26.1669	42080911
solcap_snp_c1_6126	26.167	42084637
solcap_snp_c1_9111	26.1671	42972233
solcap_snp_c2_30114	26.1672	42975226
PotVar0004166	26.1673	43478655
solcap_snp_c1_10941	26.1674	43896886
solcap_snp_c2_55042	26.1675	44379208
solcap_snp_c2_53249	26.1676	45356722
solcap_snp_c2_43221	29.6597	45574143
solcap_snp_c2_43223	29.6598	45574436
solcap_snp_c2_43227	29.6599	45578540
solcap_snp_c2_43229	29.66	45581120
solcap_snp_c2_43230	29.6601	45581873
solcap_snp_c2_55090	29.6602	45805693
solcap_snp_c2_54605	29.8322	45916672
solcap_snp_c2_58004	30.2568	45993149
solcap_snp_c2_56758	31.11	46394596
solcap_snp_c1_3310	31.3826	46475710
solcap_snp_c2_10007	31.3827	46479675
PotVar0009080	31.3828	46547868
solcap_snp_c1_3319	31.5666	46805479
solcap_snp_c2_10026	31.5667	46805752
solcap_snp_c2_10025	31.5668	46809174
solcap_snp_c2_10020	31.824	47312081
solcap_snp_c1_3317	31.8241	47323107
solcap_snp_c1_3316	32.2374	47323192
solcap_snp_c2_10015	32.2375	47577054
solcap_snp_c2_10008	32.2376	47579278
solcap_snp_c2_7764	32.2377	47899822
solcap_snp_c2_7769	32.2378	47900409
solcap_snp_c2_7773	32.2695	47981490
solcap_snp_c1_2681	32.2998	48003427
solcap_snp_c2_42168	32.2999	48364272
solcap_snp_c2_16247	32.3	48417160
solcap_snp_c2_16260	32.3001	48418966
solcap_snp_c2_16262	32.3002	48419347
PotVar0009060	32.3003	48479188
PotVar0009002	32.4633	48479853
solcap_snp_c2_16269	32.4634	48605369
solcap_snp_c1_5209	32.4635	48610397
solcap_snp_c1_5420	34.5639	48813190
solcap_snp_c2_16720	34.564	48815596
solcap_snp_c2_16722	34.5641	48815750
solcap_snp_c2_16712	34.7458	48922939
solcap_snp_c2_16713	35.1284	48923002
solcap_snp_c2_16718	35.1285	49159890
solcap_snp_c2_16738	35.4388	49356607
solcap_snp_c2_16744	35.4389	49474555
solcap_snp_c1_15530	35.5529	49574635
solcap_snp_c1_5430	35.6546	49655558
solcap_snp_c1_5431	35.6547	49659445
solcap_snp_c2_48814	35.6548	50193422
solcap_snp_c2_48817	35.6549	50241640
solcap_snp_c2_48818	35.655	50242180
solcap_snp_c1_14442	37.1565	50326084
solcap_snp_c1_16534	37.1566	50439613
solcap_snp_c2_39856	37.1567	50676447
PotVar0076114	37.1568	50826708
PotVar0076126	37.1569	50826961
PotVar0076139	37.2165	50827952
PotVar0076141	37.2166	50828150
PotVar0076153	37.2167	50828459
PotVar0076174	37.2168	50838490
PotVar0076175	37.2169	50838504
PotVar0076211	37.217	50839242
PotVar0076226	37.2171	50839425
PotVar0076243	37.2172	50839735
PotVar0076251	37.2173	50884268
solcap_snp_c2_39847	37.2174	50884547
solcap_snp_c2_39848	37.2175	50884571
solcap_snp_c1_11791	37.2176	50922404
solcap_snp_c1_13396	37.5129	51021590
solcap_snp_c2_19001	37.8123	51407692
solcap_snp_c2_55711	37.8124	51812751
solcap_snp_c2_55710	37.8125	51813823
solcap_snp_c2_54533	38.388	51913379
PotVar0130937	39.2416	52033738
solcap_snp_c2_54229	39.2417	52033872
PotVar0130958	39.2418	52034758
PotVar0130964	39.2419	52034868
PotVar0130982	39.242	52035372
PotVar0130983	39.2421	52037244
PotVar0130984	39.2422	52037278
PotVar0130989	39.2423	52037500
solcap_snp_c1_15760	39.2424	52037629
solcap_snp_c2_56238	40.006	52463182
solcap_snp_c2_1508	40.0061	52513480
solcap_snp_c2_1506	40.0062	52534629
solcap_snp_c2_1499	40.0063	52551658
solcap_snp_c2_1498	40.0064	52551774
solcap_snp_c1_370	40.0065	52558547
PotVar0074712	40.0066	52950145
PotVar0074742	40.0067	52951274
PotVar0074766	40.0068	52951983
PotVar0074826	40.0069	52955249
solcap_snp_c2_53566	40.0071	53071653
solcap_snp_c2_45034	40.2403	53671822
PotVar0074876	40.2404	53730866
PotVar0074928	40.6473	53731799
PotVar0074982	40.6474	53735289
PotVar0075042	40.6475	53738788
PotVar0075063	40.6476	53741871
solcap_snp_c2_45040	41.2185	53864206
solcap_snp_c2_58361	41.9216	53984540
solcap_snp_c2_45123	41.9217	53994118
PotVar0116320	41.9218	53996739
PotVar0116267	41.9219	53997694
PotVar0116182	41.922	54000118
PotVar0116179	41.9221	54000283
PotVar0116167	41.9222	54000740
PotVar0116154	41.9223	54000948
solcap_snp_c1_15513	41.9224	54125991
solcap_snp_c1_15983	42.7764	54396697
solcap_snp_c1_15982	42.9251	54396852
solcap_snp_c1_15977	42.9288	54419164
PotVar0133248	42.9289	54616137
PotVar0133162	43.0696	54619297
PotVar0133117	43.1615	54619653
PotVar0133116	43.1616	54619680
PotVar0133115	43.1617	54619797
PotVar0133113	43.1618	54619820
solcap_snp_c1_15878	43.1619	54674058
solcap_snp_c1_14440	43.162	55384468
solcap_snp_c1_14435	43.1621	55385909
solcap_snp_c2_48810	43.1622	55407627
solcap_snp_c2_48808	43.1623	55441858
PotVar0088499	43.1624	56062644
PotVar0088498	44.0004	56062675
PotVar0088487	44.0592	56063005
solcap_snp_c2_21974	45.276	56449719
solcap_snp_c1_16625	46.431	57243271
solcap_snp_c2_52890	46.4311	57285169
solcap_snp_c2_52892	46.4312	57298517
solcap_snp_c2_52867	46.7004	57652163
solcap_snp_c2_52866	46.7005	57653079
solcap_snp_c2_43998	47.7371	57899561
solcap_snp_c2_44000	47.7372	57899966
PotVar0084419	48.4066	58263603
solcap_snp_c2_34958	48.4067	58441701
solcap_snp_c2_34960	48.4068	58442164
PotVar0116492	48.4069	58838906
PotVar0116521	48.407	58840177
solcap_snp_c2_36031	48.8933	58867988
solcap_snp_c2_36033	48.8934	58868459
solcap_snp_c2_36037	48.8935	58868987
solcap_snp_c2_36053	48.8936	58951832
solcap_snp_c2_36060	49.334	59098892
solcap_snp_c2_55849	50.1509	59150916
solcap_snp_c2_39804	51.5179	59825374
solcap_snp_c1_11750	51.518	59828910
solcap_snp_c2_39801	51.5181	59829020
PotVar0100538	52.1668	60127228
PotVar0100536	52.1669	60127408
PotVar0100515	52.167	60127796
solcap_snp_c2_51249	52.5103	60139357
solcap_snp_c1_11360	53.2814	61124893
solcap_snp_c1_11356	54.5575	61160138
solcap_snp_c1_11352	54.5576	61194011
solcap_snp_c1_11391	54.5577	61215427
solcap_snp_c2_38116	54.5578	61284452
PotVar0099182	55.8357	61671162
PotVar0099137	55.8358	61672933
PotVar0099095	55.8359	61673625
PotVar0099071	56.2405	61674153
PotVar0098992	56.2406	61696922
PotVar0098903	56.2407	61700041
solcap_snp_c1_11206	56.5808	62135720
solcap_snp_c1_11211	56.915	62257382
PotVar0071171	56.9151	62419849
PotVar0071128	56.9152	62420439
PotVar0071109	56.9153	62420765
PotVar0071051	56.9154	62421488
PotVar0071041	56.9155	62421605
solcap_snp_c1_9769	56.9156	62427371
solcap_snp_c2_32600	57.1389	62597664
PotVar0071004	57.3356	62730385
PotVar0070881	57.3588	62732752
PotVar0070818	57.3589	62734436
PotVar0070816	57.359	62734645
solcap_snp_c2_32550	57.3591	62752969
solcap_snp_c2_32543	57.3592	62775952
PotVar0070760	58.103	63040037
PotVar0070638	58.1031	63041786
solcap_snp_c2_49997	58.1032	63076109
solcap_snp_c2_39463	58.1033	63406121
solcap_snp_c1_11670	58.3919	63515949
solcap_snp_c2_39437	58.392	63548207
solcap_snp_c2_39439	58.3921	63558935
solcap_snp_c2_39441	58.3922	63559108
solcap_snp_c2_39442	58.3923	63559196
solcap_snp_c2_39443	58.3924	63562121
solcap_snp_c2_39447	58.7836	63659301
solcap_snp_c2_39448	58.7837	63659421
solcap_snp_c2_39453	58.7838	63668434
solcap_snp_c2_43736	59.1698	63845729
solcap_snp_c2_43722	59.9873	64012524
solcap_snp_c2_43743	60.29	64061387
solcap_snp_c2_43748	60.2901	64087659
PotVar0113891	60.6291	64088621
PotVar0113894	60.6292	64088754
PotVar0114025	60.6293	64216789
solcap_snp_c2_39341	60.6294	64216910
PotVar0114036	60.8894	64216973
solcap_snp_c2_39327	61.3764	64275135
solcap_snp_c1_12564	62.497	64549009
solcap_snp_c2_42685	62.4971	64607518
solcap_snp_c2_21590	62.4972	64758588
solcap_snp_c2_21578	62.7415	64775909
solcap_snp_c2_21576	62.7416	64776128
solcap_snp_c2_21574	62.8717	64781064
PotVar0000812	63.1609	64801926
PotVar0000805	63.161	64801981
PotVar0000767	63.1611	64803299
PotVar0000760	63.1612	64804249
PotVar0000732	63.6272	64804683
PotVar0000716	63.6276	64804890
solcap_snp_c1_6749	64.1032	64973061
solcap_snp_c1_6748	64.3875	64996975
PotVar0000586	64.3876	64997519
PotVar0000583	64.3877	64999812
PotVar0000568	64.3878	65000113
PotVar0000542	64.3879	65000457
PotVar0000514	64.388	65000751
solcap_snp_c2_21463	64.3881	65081875
PotVar0000495	65.5821	65237296
PotVar0000474	67.2535	65303307
PotVar0000446	67.2536	65304835
solcap_snp_c1_8328	68.4256	65577930
solcap_snp_c2_26731	68.4257	65583822
solcap_snp_c2_26747	68.4258	65591077
solcap_snp_c2_26758	68.7264	65600291
solcap_snp_c2_26675	68.7265	65727042
solcap_snp_c2_26688	68.9432	65767269
solcap_snp_c1_8316	68.9433	65802638
PotVar0123717	69.9043	65866032
PotVar0123709	69.9044	65866208
PotVar0123702	69.9045	65866382
solcap_snp_c1_7990	69.9046	65866827
PotVar0123664	69.9047	65866953
solcap_snp_c2_25282	69.9048	65867121
PotVar0123654	69.9049	65867228
solcap_snp_c2_25283	69.905	65867228
PotVar0123635	69.9051	65872023
solcap_snp_c2_25284	69.9052	65872176
solcap_snp_c2_55793	70.0204	65970096
solcap_snp_c2_55791	70.0205	65970282
solcap_snp_c2_55788	70.0206	65970724
solcap_snp_c2_55787	70.0207	65970813
solcap_snp_c2_55784	70.0208	65970986
solcap_snp_c2_55783	70.0209	65971150
solcap_snp_c2_55780	70.021	65971280
solcap_snp_c2_55777	70.0211	65971441
solcap_snp_c1_16191	70.0212	65971751
solcap_snp_c2_55774	70.0213	65972478
solcap_snp_c2_55768	70.0214	65972774
PotVar0086982	70.0215	66037486
PotVar0087016	70.427	66038092
PotVar0087030	70.4271	66038295
solcap_snp_c2_26712	72.0227	66043528
solcap_snp_c2_26713	72.0228	66043536
solcap_snp_c1_8319	72.0229	66074599
solcap_snp_c1_8330	72.2784	66142540
PotVar0087064	72.2785	66147380
PotVar0087115	72.2786	66149485
PotVar0087126	72.5855	66149675
PotVar0087136	72.5856	66149878
PotVar0087151	72.5857	66150093
PotVar0087179	73.0607	66204483
solcap_snp_c2_26740	73.0608	66204641
solcap_snp_c2_26741	73.0609	66204701
PotVar0087222	73.061	66205956
PotVar0087233	73.4558	66210459
PotVar0087234	73.4559	66210576
PotVar0087235	73.456	66210684
solcap_snp_c2_26744	73.4561	66212305
PotVar0087323	73.4562	66212492
solcap_snp_c2_38556	74.8535	66415083
solcap_snp_c2_38611	76.3664	66650026
solcap_snp_c1_13172	76.8772	66920028
solcap_snp_c2_32056	77.3362	67048197
solcap_snp_c2_32042	77.3363	67130719
PotVar0111367	77.3364	67166601
PotVar0111404	77.3365	67167166
PotVar0111409	77.3366	67167270
PotVar0111414	77.5639	67167376
PotVar0111470	77.564	67169183
PotVar0111471	77.5641	67169323
PotVar0111515	77.5642	67171446
PotVar0111522	77.5643	67171542
solcap_snp_c1_9619	78.8581	67248738
solcap_snp_c2_32019	78.8582	67285597
solcap_snp_c1_9613	78.8583	67294211
PotVar0111531	78.8584	67295219
PotVar0111553	78.8585	67295597
PotVar0111554	78.8586	67295641
PotVar0111582	79.1495	67296060
solcap_snp_c2_32099	79.2048	67342310
solcap_snp_c2_54446	79.4968	67422348
solcap_snp_c2_52206	79.7741	67567676
solcap_snp_c2_52205	79.7742	67570682
solcap_snp_c2_52203	79.7743	67585796
solcap_snp_c2_52202	79.7744	67609888
solcap_snp_c2_52196	79.9726	67631273
solcap_snp_c2_52195	79.9727	67631327
solcap_snp_c2_19584	79.9728	67766128
PotVar0075236	79.9729	67806787
PotVar0075255	80.2352	67807068
PotVar0075293	80.7502	67821894
PotVar0075295	80.7503	67821913
solcap_snp_c2_34915	80.7504	67821952
PotVar0075314	80.7505	67822133
PotVar0075324	80.7506	67822196
solcap_snp_c1_10435	80.9215	67842288
PotVar0075407	81.5186	67908727
PotVar0075409	81.5187	67908770
solcap_snp_c2_34890	81.5188	67953469
solcap_snp_c2_34876	81.5189	67981010
solcap_snp_c2_34875	81.519	67981117
solcap_snp_c2_34873	81.5191	67981400
solcap_snp_c2_34872	81.5192	67981423
solcap_snp_c2_34868	83.0687	67982840
solcap_snp_c2_34867	83.0688	67982950
solcap_snp_c2_34866	83.0689	67983036
solcap_snp_c2_34864	83.069	67983402
solcap_snp_c2_34863	83.0691	67984659
solcap_snp_c2_34862	83.0692	67984665
solcap_snp_c1_10424	83.0693	67985201
solcap_snp_c2_34861	83.0694	67985836
solcap_snp_c1_10416	83.1262	68059930
solcap_snp_c2_34820	83.3089	68126486
solcap_snp_c2_34819	83.3647	68129288
PotVar0075505	84.1198	68137654
PotVar0075516	84.1199	68137873
PotVar0075528	84.12	68139837
PotVar0075537	84.1201	68139936
PotVar0075575	84.1202	68140341
PotVar0075591	84.1203	68140523
PotVar0075682	84.1204	68141354
PotVar0075687	84.1205	68141384
solcap_snp_c2_34812	84.1206	68141446
PotVar0075733	85.3333	68261649
PotVar0075734	85.3334	68261705
PotVar0075742	85.3335	68261816
PotVar0075793	85.3336	68265803
PotVar0075795	85.3337	68265844
PotVar0075826	85.3338	68293328
PotVar0075829	85.3339	68293381
PotVar0075882	85.7751	68294006
PotVar0075976	85.7752	68295040
PotVar0076006	85.7753	68295465
solcap_snp_c2_54749	86.1316	68295710
PotVar0076032	86.1317	68295938
solcap_snp_c1_3166	86.1318	68439384
solcap_snp_c2_56837	86.3978	68481475
solcap_snp_c2_44461	86.9754	68722211
solcap_snp_c1_13077	87.1126	68865108
solcap_snp_c1_13079	87.1127	68868319
solcap_snp_c1_4180	87.3395	69079236
PotVar0130789	87.3396	69089491
PotVar0130793	87.4348	69089581
PotVar0130812	87.4349	69089868
PotVar0130826	87.435	69090178
PotVar0130835	88.8119	69090355
PotVar0130875	88.812	69091052
PotVar0130885	88.8121	69091165
solcap_snp_c1_4178	88.8122	69122414
solcap_snp_c2_12959	88.9886	69138945
solcap_snp_c2_12958	90.2231	69148562
solcap_snp_c2_12957	90.2232	69148700
solcap_snp_c2_12956	90.2233	69148721
solcap_snp_c2_12955	90.2234	69148829
solcap_snp_c2_12954	90.2235	69149897
solcap_snp_c2_12953	90.2236	69150093
solcap_snp_c2_12947	90.3508	69185901
solcap_snp_c2_12945	91.3321	69186102
solcap_snp_c2_12937	92.2723	69206573
solcap_snp_c2_12928	92.2724	69322253
solcap_snp_c1_4171	92.8168	69336216
solcap_snp_c2_12924	92.8169	69345026
solcap_snp_c2_12913	92.9781	69391846
solcap_snp_c2_12904	93.3196	69413002
solcap_snp_c2_12903	93.3197	69415006
PotVar0015043	93.9837	69623215
PotVar0015063	93.9838	69623646
solcap_snp_c1_4140	93.9839	69649074
solcap_snp_c1_4135	93.984	69673180
solcap_snp_c1_4109	95.8149	69830197
PotVar0015152	95.816	69970742
PotVar0015291	96.2102	70015925
PotVar0015295	96.2103	70015982
PotVar0015326	96.2104	70016559
solcap_snp_c1_10211	96.2105	70065735
solcap_snp_c1_10167	97.6583	70185081
solcap_snp_c1_10178	97.6584	70199242
solcap_snp_c1_10180	97.6585	70199444
solcap_snp_c1_10181	97.6586	70200587
solcap_snp_c2_34017	97.875	70201797
solcap_snp_c2_34019	98.4257	70222194
PotVar0015370	99.3209	70250649
PotVar0015417	99.321	70251359
PotVar0015456	99.3211	70252061
solcap_snp_c2_34023	99.4374	70257151
solcap_snp_c2_34050	100.034	70330077
solcap_snp_c2_34051	100.035	70330245
solcap_snp_c1_10196	100.874	70365272
solcap_snp_c1_10202	100.874	70396887
solcap_snp_c1_13349	101.093	70589201
solcap_snp_c2_45122	101.094	70592443
solcap_snp_c1_13354	101.991	70596441
solcap_snp_c2_35970	102.672	70731750
PotVar0015513	102.673	70743116
PotVar0015535	102.673	70743638
PotVar0015546	102.793	70743831
PotVar0015588	102.793	70759262
PotVar0015639	102.793	70760360
PotVar0015728	102.793	70762273
PotVar0015987	104.138	70875680
solcap_snp_c2_35944	104.138	70878898
solcap_snp_c2_35943	104.138	70878904
solcap_snp_c2_35941	104.138	70879006
solcap_snp_c1_10670	104.138	70880221
solcap_snp_c1_10669	104.138	70880440
solcap_snp_c1_10668	104.138	70880906
solcap_snp_c1_10667	104.139	70880971
solcap_snp_c1_10715	104.97	70939324
solcap_snp_c2_35998	105.112	70939686
solcap_snp_c2_35997	105.112	70941431
solcap_snp_c1_10714	105.112	70953672
solcap_snp_c1_10712	105.112	70954662
solcap_snp_c1_10711	105.296	70954731
solcap_snp_c2_10870	107.15	71185008
solcap_snp_c2_10867	107.358	71185790
PotVar0016123	109.055	71207248
PotVar0016129	109.055	71207360
PotVar0016132	109.303	71207390
PotVar0016133	109.411	71207426
PotVar0016137	109.427	71207502
PotVar0016173	109.444	71220095
PotVar0016176	109.444	71220153
PotVar0016177	109.538	71220198
PotVar0016251	109.538	71221277
PotVar0016254	109.538	71221298
solcap_snp_c2_10828	110.298	71278943
solcap_snp_c2_10820	110.298	71333000
PotVar0016374	111.211	71333722
PotVar0016397	111.864	71334145
PotVar0016403	111.864	71334255
PotVar0016414	111.864	71335030
solcap_snp_c2_10819	111.864	71335030
PotVar0016416	111.864	71335125
PotVar0016497	111.864	71336168
PotVar0016517	113.093	71336433
PotVar0016549	113.093	71336869
solcap_snp_c1_3553	113.093	71359551
solcap_snp_c2_10802	113.093	71383390
solcap_snp_c2_10800	113.094	71383501
solcap_snp_c2_10799	113.094	71383530
solcap_snp_c1_3545	113.094	71383982
solcap_snp_c2_10798	113.094	71384419
solcap_snp_c1_3544	113.094	71385536
solcap_snp_c2_10797	113.094	71387933
PotVar0016608	113.713	71427689
PotVar0016612	113.713	71427772
PotVar0016703	113.713	71429203
PotVar0016717	113.713	71429402
PotVar0016775	114.359	71527352
PotVar0016834	114.359	71529737
PotVar0016845	114.359	71529953
PotVar0016969	114.5	71583581
PotVar0017024	114.855	71584152
solcap_snp_c2_10693	116.023	71588170
solcap_snp_c1_3526	116.023	71589190
PotVar0017169	116.118	71590312
solcap_snp_c1_3525	116.118	71590312
PotVar0017171	116.118	71590429
solcap_snp_c2_10686	116.118	71592367
solcap_snp_c2_10685	116.64	71592390
solcap_snp_c2_10681	116.64	71592572
solcap_snp_c2_10659	117.575	71638210
solcap_snp_c2_10658	117.575	71638309
solcap_snp_c2_10656	117.575	71654784
solcap_snp_c2_10635	118.946	71776406
PotVar0017358	118.946	71813372
PotVar0017372	118.946	71813647
PotVar0017373	118.946	71813672
PotVar0017410	119.921	71814632
PotVar0017432	119.921	71815181
solcap_snp_c2_10626	119.921	71816913
solcap_snp_c2_10617	119.921	71826257
solcap_snp_c1_3499	120.591	71826344
solcap_snp_c2_10612	120.592	71828638
solcap_snp_c1_3497	120.592	71854295
solcap_snp_c1_3484	121.281	71945107
solcap_snp_c2_10567	121.41	71954567
solcap_snp_c2_10566	121.61	71954636
solcap_snp_c2_10565	121.61	71955746
solcap_snp_c2_10563	121.61	71956350
solcap_snp_c1_3478	121.812	71956738
solcap_snp_c2_10548	121.812	72022392
PotVar0017473	122.586	72022591
solcap_snp_c2_10547	122.586	72022751
PotVar0017484	122.587	72022781
PotVar0017501	122.587	72023061
PotVar0017563	123.103	72024466
PotVar0017705	123.103	72026758
solcap_snp_c2_10545	123.103	72029087
solcap_snp_c1_3460	123.103	72029728
PotVar0017735	123.103	72029800
PotVar0017806	123.103	72030985

## Sheet: chr5
Supplementary Table 3. Molecular markers linkage map of chromosome 5.
Marker	Position (cM)	Physical Position
solcap_snp_c2_23669	0	190926
solcap_snp_c2_43944	0	64155
solcap_snp_c2_23678	0.0001	224801
solcap_snp_c2_23728	0.641832	325029
PotVar0048854	1.43483	349485
PotVar0048835	1.43493	349777
PotVar0048790	1.43503	350527
PotVar0048722	1.43513	351224
PotVar0048673	1.43523	351718
PotVar0048670	1.43533	351772
PotVar0048605	1.52618	352506
solcap_snp_c2_23735	1.52628	388873
solcap_snp_c2_23738	1.52638	389065
PotVar0048521	1.52648	402872
PotVar0048457	1.66666	403773
PotVar0048349	1.66676	496599
PotVar0048336	2.29111	496816
PotVar0048303	2.29121	497295
PotVar0048229	2.52173	531245
PotVar0048209	3.08979	531399
solcap_snp_c2_52276	3.94253	561523
solcap_snp_c2_23786	3.94263	576707
solcap_snp_c1_7633	4.67113	639163
PotVar0048171	4.8192	693435
PotVar0048148	5.2729	693716
solcap_snp_c2_23828	5.273	694091
solcap_snp_c2_23829	5.2731	694151
solcap_snp_c2_23831	5.62414	694355
solcap_snp_c2_23832	5.62424	694469
solcap_snp_c2_23834	5.62434	694541
solcap_snp_c2_23836	5.62444	694653
solcap_snp_c2_23841	5.62454	703580
solcap_snp_c2_23842	5.62464	705671
solcap_snp_c2_23843	5.62474	705734
solcap_snp_c2_23846	5.62484	727316
solcap_snp_c1_15684	6.79426	1041105
solcap_snp_c2_40379	7.20849	1091964
PotVar0048128	7.20859	1105303
PotVar0048119	7.20869	1105426
PotVar0048114	7.85753	1105576
solcap_snp_c2_33598	8.36014	1245711
solcap_snp_c2_33508	9.01827	1400727
solcap_snp_c2_33509	9.01837	1400794
solcap_snp_c2_33512	9.01847	1401412
solcap_snp_c2_33513	9.01857	1401419
solcap_snp_c2_33515	9.01867	1411584
solcap_snp_c2_33516	10.0887	1413720
solcap_snp_c2_33517	10.0888	1413732
solcap_snp_c2_33518	10.0889	1413816
solcap_snp_c2_33520	10.089	1413918
solcap_snp_c2_33521	10.0891	1413945
solcap_snp_c2_33522	10.0892	1414020
solcap_snp_c2_33532	10.4919	1425058
solcap_snp_c2_33535	10.492	1437829
solcap_snp_c1_10042	10.4921	1438051
solcap_snp_c2_33536	10.9804	1438486
solcap_snp_c2_33537	10.9805	1438693
solcap_snp_c2_33545	11.1843	1505744
solcap_snp_c2_57149	11.6321	1738100
solcap_snp_c2_52061	11.679	1832192
solcap_snp_c2_52066	12.1833	1847520
solcap_snp_c2_52067	12.1834	1847556
solcap_snp_c2_52069	12.1835	1847677
solcap_snp_c2_52070	12.1836	1853441
solcap_snp_c2_52081	12.1837	1883165
solcap_snp_c2_52084	13.6684	1902218
PotVar0114684	13.6685	1956664
PotVar0114686	13.6686	1956763
PotVar0114697	13.6687	1956901
solcap_snp_c2_11605	13.6688	1957512
solcap_snp_c2_11604	14.1936	1957584
PotVar0114753	14.1937	1957593
PotVar0114766	14.1938	1957710
solcap_snp_c2_11766	14.6688	1996437
solcap_snp_c2_11758	14.6689	1997209
solcap_snp_c2_11747	14.669	2037634
solcap_snp_c2_11712	14.6691	2149871
solcap_snp_c2_11707	15.3578	2214471
solcap_snp_c2_11696	15.7846	2261080
solcap_snp_c2_11695	15.7847	2261237
solcap_snp_c2_11685	16.1722	2288291
solcap_snp_c1_3767	18.8539	2781880
solcap_snp_c2_11648	19.5833	2866399
solcap_snp_c2_11646	20.317	2876174
PotVar0024528	20.3171	2890017
PotVar0024602	20.3172	2890658
PotVar0024611	20.3173	2890835
PotVar0024645	21.2155	2958805
PotVar0024709	21.2156	2963583
PotVar0024712	21.2157	2963647
PotVar0024728	21.2158	2963868
solcap_snp_c2_11616	21.2159	2963974
PotVar0024747	21.216	2964094
solcap_snp_c2_11772	22.5336	3110161
solcap_snp_c2_11771	22.5337	3112596
solcap_snp_c1_3840	22.5338	3134967
solcap_snp_c2_12051	24.6378	3340000
PotVar0024773	24.6379	3358458
solcap_snp_c2_12049	24.7869	3358683
PotVar0024787	24.787	3358775
PotVar0024816	24.7871	3360985
PotVar0024937	24.7872	3362327
PotVar0024998	24.7873	3363673
PotVar0025046	25.1237	3365295
PotVar0025052	25.1238	3365443
PotVar0025053	25.1239	3365524
PotVar0025139	25.124	3400135
PotVar0025140	25.1241	3400171
PotVar0025179	25.9698	3400578
solcap_snp_c2_12005	25.9699	3435622
solcap_snp_c2_11999	25.97	3452241
solcap_snp_c2_11996	25.9701	3452407
solcap_snp_c2_11993	26.1908	3454043
solcap_snp_c2_11984	26.1909	3483408
solcap_snp_c1_3819	27.0485	3516358
solcap_snp_c2_11970	27.0486	3520468
solcap_snp_c2_11967	27.0487	3531210
PotVar0025296	27.0488	3536694
solcap_snp_c2_11961	28.117	3538675
PotVar0025350	28.1171	3539126
solcap_snp_c1_3815	28.1172	3539194
PotVar0025360	28.1173	3539328
solcap_snp_c2_11954	28.1174	3566044
solcap_snp_c2_11952	28.1175	3568080
solcap_snp_c2_11949	29.5793	3570113
solcap_snp_c1_3798	30.2384	3688719
solcap_snp_c1_3795	30.2385	3702171
solcap_snp_c2_11924	30.2386	3708760
solcap_snp_c1_3793	30.2387	3709723
solcap_snp_c2_11923	30.2388	3710249
PotVar0025449	30.7193	3767949
PotVar0025527	30.7194	3768576
PotVar0025554	30.7195	3768934
solcap_snp_c2_11912	30.7196	3769593
solcap_snp_c2_11899	30.7197	3776286
solcap_snp_c2_11896	30.7198	3777267
solcap_snp_c1_3790	30.7199	3811997
PotVar0025579	30.7207	3813204
PotVar0025592	31.4232	3813315
PotVar0025600	31.4233	3813489
PotVar0025607	31.4234	3813546
PotVar0025609	31.8487	3813616
solcap_snp_c2_11860	31.8488	3873781
PotVar0025923	31.8489	3875191
PotVar0025938	31.849	3875368
PotVar0025980	31.8491	3875761
PotVar0026021	31.8492	3876212
PotVar0026032	31.8493	3876317
PotVar0026049	31.8494	3876464
PotVar0026053	31.8495	3876533
PotVar0026057	31.8496	3876588
solcap_snp_c1_3789	32.5602	3945412
solcap_snp_c2_11851	32.9239	3949960
solcap_snp_c1_3786	32.924	3960507
solcap_snp_c1_3784	33.5016	4029280
solcap_snp_c2_11829	33.5017	4041510
solcap_snp_c2_11803	33.6577	4069660
solcap_snp_c2_11799	33.7941	4094736
solcap_snp_c1_3810	33.7942	4204684
PotVar0026113	34.3484	4250232
PotVar0026238	34.3485	4251459
solcap_snp_c2_11824	34.3486	4251874
PotVar0026296	34.3487	4252165
PotVar0026313	34.3488	4252576
PotVar0026323	34.3489	4252831
PotVar0026331	34.349	4252966
solcap_snp_c2_22986	34.3491	4279075
PotVar0026350	34.3492	4335252
PotVar0026355	34.3493	4335324
PotVar0026402	35.2511	4337282
PotVar0026420	35.2512	4337526
PotVar0026425	35.3017	4337563
PotVar0026556	35.5692	4339620
PotVar0077822	35.5693	4401065
PotVar0077832	35.5694	4401263
PotVar0077879	35.5695	4401844
PotVar0077892	35.5696	4402077
PotVar0077897	35.5697	4402263
PotVar0077924	35.5698	4402607
PotVar0077955	35.5699	4403613
PotVar0077965	35.57	4403822
PotVar0078021	35.5701	4406612
PotVar0078030	35.5702	4406847
PotVar0078045	35.7452	4407080
PotVar0078126	35.7453	4409739
PotVar0078161	35.7454	4410107
PotVar0078162	35.769	4410189
PotVar0078199	35.7866	4410712
PotVar0078213	35.7867	4411043
PotVar0078379	35.8081	4417685
PotVar0078411	35.8082	4417997
PotVar0078443	35.8083	4418484
PotVar0078518	35.8084	4419418
PotVar0078519	35.8085	4419471
PotVar0078533	35.8086	4420105
PotVar0078561	35.8087	4420610
PotVar0078593	35.8088	4420985
PotVar0078648	36.0282	4432486
PotVar0078685	36.0283	4433051
PotVar0078701	36.4995	4433198
solcap_snp_c2_22959	36.4996	4434048
PotVar0078839	36.4997	4437740
PotVar0078841	36.4998	4437819
PotVar0078881	36.4999	4442413
solcap_snp_c2_22964	36.6768	4470491
PotVar0079027	36.6769	4487738
PotVar0079038	36.677	4488420
PotVar0079063	36.6771	4489234
PotVar0079081	36.6772	4489481
PotVar0079086	36.6773	4489590
solcap_snp_c1_7356	36.6774	4489718
PotVar0079110	36.6775	4490148
PotVar0079150	36.6776	4490763
PotVar0079157	36.6777	4490851
solcap_snp_c1_7358	36.6778	4490899
PotVar0079374	36.8381	4495794
PotVar0079376	36.8382	4495869
PotVar0079403	36.8383	4503980
PotVar0079406	37.3318	4504009
PotVar0079428	37.3319	4504223
PotVar0079450	37.332	4504555
PotVar0079478	37.3321	4507537
PotVar0079489	37.3322	4507816
PotVar0079547	37.7139	4509026
PotVar0079577	37.714	4539949
PotVar0079585	37.7141	4540110
PotVar0079600	37.7142	4540720
PotVar0079611	37.7143	4540966
PotVar0079612	37.7144	4541030
PotVar0079639	37.7145	4548335
PotVar0079652	37.7146	4548540
PotVar0079746	37.8815	4550212
solcap_snp_c2_22995	37.8816	4599164
PotVar0079769	37.8817	4628267
PotVar0079801	37.8818	4628660
PotVar0079803	38.2155	4628704
PotVar0079820	38.2156	4629401
solcap_snp_c2_23014	38.2992	4629609
PotVar0079860	38.3423	4629750
PotVar0079861	38.3424	4629801
PotVar0079863	38.3425	4629843
PotVar0079877	38.5207	4630084
solcap_snp_c2_23017	38.5208	4670373
PotVar0079901	38.5209	4700911
PotVar0079926	38.6353	4701233
PotVar0079930	38.7393	4701358
PotVar0079935	38.7394	4701481
PotVar0079948	38.7395	4701617
PotVar0079955	38.7396	4701731
PotVar0079966	38.7397	4708417
PotVar0080026	39.0575	4709693
PotVar0080110	39.3755	4720238
PotVar0080173	39.3756	4721997
PotVar0080186	39.3757	4722081
PotVar0080210	39.3758	4722362
solcap_snp_c1_7368	39.3759	4722471
PotVar0080213	39.376	4722513
PotVar0080234	39.3761	4722666
PotVar0080275	39.3762	4723959
PotVar0080280	39.3763	4724077
PotVar0080284	39.3764	4724189
PotVar0080464	39.3765	4727271
PotVar0080470	39.3766	4727337
solcap_snp_c2_23032	39.3767	4731506
PotVar0080570	39.51	4751676
PotVar0080609	39.5101	4752124
PotVar0080614	39.5102	4752243
PotVar0080736	39.5103	4787352
PotVar0080753	39.5104	4787587
PotVar0080774	39.5105	4787811
PotVar0080850	39.8246	4791700
PotVar0080881	39.8247	4791965
PotVar0080886	39.8248	4792122
solcap_snp_c2_23052	39.8249	4906728
PotVar0129936	39.825	4921061
PotVar0130000	39.9131	4922047
solcap_snp_c2_23055	40.1131	4936332
solcap_snp_c2_23056	40.1132	4936615
solcap_snp_c2_50306	40.1133	5051710
solcap_snp_c1_14802	40.1134	5051766
solcap_snp_c2_50305	40.321	5052466
solcap_snp_c1_14801	40.7866	5053838
solcap_snp_c2_50304	41.0001	5055627
solcap_snp_c2_50301	41.0002	5055948
solcap_snp_c2_50300	41.0003	5055959
PotVar0116826	41.0004	5363195
PotVar0116897	41.0005	5363745
PotVar0116977	41.0006	5364606
PotVar0117047	41.0007	5365755
PotVar0117065	41.0008	5365962
PotVar0117068	41.0009	5366000
PotVar0117073	41.001	5366084
PotVar0117095	41.0011	5368377
PotVar0117119	41.0012	5370258
solcap_snp_c2_54033	41.0345	5381072
solcap_snp_c1_4043	41.0434	5487240
solcap_snp_c2_12510	41.0537	5506532
solcap_snp_c2_51464	41.2511	5533993
solcap_snp_c2_51473	41.3615	5574612
solcap_snp_c1_14836	41.4945	5683864
PotVar0117191	42.0971	5684793
PotVar0117267	42.0972	5690944
PotVar0117270	42.0973	5691047
PotVar0117275	42.0974	5691085
PotVar0117309	42.0975	5691487
solcap_snp_c1_14839	42.0976	5692751
PotVar0117352	42.1667	5692769
solcap_snp_c1_14840	42.1668	5692769
solcap_snp_c2_50429	42.1669	5692904
PotVar0117366	42.167	5692958
PotVar0117389	42.1671	5693199
solcap_snp_c1_14841	42.1672	5693667
PotVar0117437	42.1673	5693876
PotVar0117438	42.1674	5693945
PotVar0117441	42.1675	5693976
solcap_snp_c2_50421	43.1066	5791983
PotVar0089965	43.6797	5918719
PotVar0089951	43.6798	5918858
PotVar0089949	43.6799	5918928
PotVar0089875	43.68	5919956
solcap_snp_c2_47644	43.6801	5920033
PotVar0089860	43.871	5920241
PotVar0089856	43.8711	5921029
solcap_snp_c2_47646	43.8712	5921198
PotVar0089841	43.8713	5921368
PotVar0089840	43.8714	5921471
PotVar0089832	43.8715	5921687
PotVar0089769	43.8716	5925972
PotVar0089758	43.8717	5926165
PotVar0089751	43.8718	5926378
solcap_snp_c2_47648	44.3121	5932020
solcap_snp_c2_47649	44.3122	5932061
PotVar0089667	44.3123	5942428
PotVar0089663	44.3124	5942512
PotVar0089662	44.589	5942580
PotVar0089604	44.5891	5943440
PotVar0089595	44.5892	5943544
PotVar0089566	44.5893	5943944
PotVar0089428	44.5894	5945262
solcap_snp_c2_47658	44.65	5945550
solcap_snp_c2_47660	44.6501	5946481
solcap_snp_c2_47663	44.6502	5946946
solcap_snp_c2_47597	44.6503	5952162
solcap_snp_c1_14127	44.6504	5967825
solcap_snp_c2_47607	44.6505	5972364
solcap_snp_c2_47609	45.312	5972404
solcap_snp_c2_47611	46.5811	5972571
solcap_snp_c2_47625	46.5812	6019641
solcap_snp_c2_52436	46.7418	6147926
solcap_snp_c2_52455	46.9202	6204099
solcap_snp_c2_47284	47.0666	6354190
solcap_snp_c2_47300	47.0667	6395068
solcap_snp_c2_47302	47.0668	6397015
solcap_snp_c2_47252	47.0669	6402146
solcap_snp_c2_38221	47.067	6497821
PotVar0089376	47.0671	6502057
PotVar0089373	47.0672	6502157
solcap_snp_c2_38197	47.4234	6567537
solcap_snp_c2_38193	47.4235	6583448
solcap_snp_c2_38172	47.7592	6625026
solcap_snp_c2_38171	47.7593	6625039
solcap_snp_c2_38167	47.7594	6625290
solcap_snp_c2_38163	47.7595	6626727
solcap_snp_c2_38140	48.0634	6665100
solcap_snp_c2_38138	48.0635	6665424
solcap_snp_c2_38229	48.7276	6772274
solcap_snp_c2_55452	48.9542	6965234
solcap_snp_c2_45539	49.4223	7131020
solcap_snp_c2_45522	49.5762	7200278
solcap_snp_c2_45553	50.3573	7286180
solcap_snp_c2_45517	50.4528	7332437
PotVar0083684	50.7516	7539195
PotVar0083688	50.7517	7539228
PotVar0083756	50.7518	7540732
PotVar0083774	50.7519	7540882
solcap_snp_c1_11265	51.1217	7547043
PotVar0083880	51.1292	7667566
PotVar0083921	51.1293	7667963
PotVar0084074	51.1294	7669320
PotVar0084089	51.1295	7669476
PotVar0084120	51.1296	7670301
PotVar0084163	51.1297	7670585
PotVar0084164	51.1298	7670627
PotVar0084190	51.1299	7670926
PotVar0084210	51.3747	7671104
PotVar0084219	51.6268	7671145
solcap_snp_c2_37719	51.6269	7675049
solcap_snp_c2_37692	52.1366	7741542
solcap_snp_c1_11259	52.1405	7752975
PotVar0125821	52.1409	8133214
PotVar0125830	52.141	8134260
PotVar0125862	52.3071	8134630
PotVar0125947	52.5302	8135348
solcap_snp_c2_37066	52.5303	8139386
solcap_snp_c2_37034	52.5304	8224735
solcap_snp_c2_48021	53.2883	8660304
solcap_snp_c1_15292	54.0449	8795719
PotVar0085459	54.045	8808396
PotVar0085404	54.0451	8808901
PotVar0085401	54.0452	8808961
solcap_snp_c1_5836	54.0453	8809052
PotVar0085312	54.0454	8813262
PotVar0085303	54.0455	8813396
PotVar0085266	54.0456	8815386
PotVar0085259	54.0457	8815495
PotVar0085257	54.0458	8815516
solcap_snp_c2_43523	54.7344	9134438
solcap_snp_c2_43515	54.8481	9144438
solcap_snp_c2_43535	55.339	9273361
solcap_snp_c2_51020	55.6194	9406931
solcap_snp_c2_51019	55.6195	9407434
solcap_snp_c1_14954	55.6196	9454607
solcap_snp_c2_55894	55.8079	9558289
solcap_snp_c2_55899	56.0103	9639945
solcap_snp_c2_55903	56.0104	9640075
solcap_snp_c2_55905	56.0105	9640118
solcap_snp_c2_55909	56.0106	9641516
PotVar0091938	56.0107	9824216
solcap_snp_c2_17449	56.0108	9824412
PotVar0091843	56.0109	9826311
PotVar0091820	56.011	9827514
PotVar0091740	56.0111	9828557
PotVar0091668	56.1227	9829658
PotVar0091625	56.1228	9830207
PotVar0091619	56.1229	9830343
PotVar0091575	56.123	9832022
PotVar0091567	56.1231	9832093
PotVar0091507	56.1232	9832925
PotVar0091465	56.1233	9834091
PotVar0091464	56.1234	9834176
PotVar0091457	56.1235	9834350
PotVar0091432	56.1236	9834718
PotVar0091419	56.1237	9834855
PotVar0091388	56.1238	9835370
PotVar0091295	56.1239	9837634
PotVar0091270	56.1247	9837856
PotVar0091259	56.3012	9838076
PotVar0091229	56.3013	9838491
solcap_snp_c1_14645	56.556	10031602
PotVar0091191	56.8094	10106754
PotVar0091176	56.8095	10109832
PotVar0091145	56.8096	10111353
PotVar0091126	56.8097	10111735
PotVar0091090	56.8098	10112748
solcap_snp_c1_14641	56.8099	10113014
PotVar0091039	56.81	10113581
PotVar0091010	56.8101	10114122
solcap_snp_c2_57876	56.8102	10174931
solcap_snp_c2_57872	56.8103	10179875
solcap_snp_c2_32877	56.8104	10273830
PotVar0090998	56.985	10300175
PotVar0090987	56.9851	10300418
solcap_snp_c1_9825	56.9852	10307318
PotVar0090941	56.9853	10321103
solcap_snp_c2_32854	56.9854	10418984
solcap_snp_c2_32885	57.3403	10645907
solcap_snp_c2_51915	57.3404	10714562
solcap_snp_c2_52505	57.6954	10930883
solcap_snp_c2_52507	57.6955	10931223
PotVar0014571	57.6956	11043589
PotVar0014564	57.6957	11043844
PotVar0014558	57.6958	11044024
PotVar0014553	57.6959	11044125
PotVar0014552	57.8122	11044183
solcap_snp_c2_43663	58.7615	11157517
solcap_snp_c2_24329	59.0037	11376900
solcap_snp_c2_24373	59.0038	11544170
solcap_snp_c2_24381	59.0039	11546044
PotVar0014522	59.0041	11711608
PotVar0014510	59.0758	11711819
PotVar0014509	59.2319	11711961
PotVar0014498	59.232	11712187
PotVar0014494	59.2321	11712281
solcap_snp_c1_15864	59.2884	11714089
solcap_snp_c2_38456	60.165	12209043
PotVar0014379	60.1651	12237043
PotVar0014376	60.1652	12237074
solcap_snp_c2_38490	60.1653	12301602
PotVar0014357	60.1654	12658399
PotVar0014354	60.1655	12658442
PotVar0014349	60.1656	12658518
PotVar0014328	60.1657	12658687
PotVar0014299	60.1658	12660998
solcap_snp_c2_56464	60.1659	12661379
solcap_snp_c1_15638	60.166	13087731
solcap_snp_c2_54598	60.1661	13164523
PotVar0109858	60.8619	13344852
PotVar0109875	60.862	13345064
PotVar0109947	60.8621	13346244
solcap_snp_c2_53298	60.8622	13360466
solcap_snp_c2_53307	60.8623	13386684
solcap_snp_c2_47087	63.1232	13688447
solcap_snp_c2_53296	63.1233	14011967
solcap_snp_c2_38749	63.2108	14095339
solcap_snp_c2_38748	63.6342	14095373
solcap_snp_c2_38739	63.6477	14151270
solcap_snp_c2_38737	63.6568	14151730
solcap_snp_c2_44034	63.6604	14363563
solcap_snp_c2_54725	63.6605	14541535
solcap_snp_c2_53962	63.6606	14877362
solcap_snp_c2_51980	63.6607	15061631
solcap_snp_c2_54743	64.364	15144817
solcap_snp_c2_54741	64.3641	15144939
PotVar0104964	64.3642	15763640
PotVar0104925	64.3643	15764589
PotVar0104920	64.3644	15764802
PotVar0104911	64.3645	15764969
PotVar0104871	64.3646	15766464
PotVar0104857	64.3647	15766741
PotVar0104825	64.3648	15767527
solcap_snp_c2_49286	64.3649	15767704
PotVar0104802	64.5857	15767938
solcap_snp_c2_53565	64.5858	15799188
solcap_snp_c2_44845	64.5859	16466042
solcap_snp_c2_48317	65.4812	16835124
solcap_snp_c2_44073	66.1024	17003787
solcap_snp_c1_15249	66.4837	17620118
solcap_snp_c1_12835	66.4838	17840305
PotVar0021329	66.4839	18037356
solcap_snp_c2_43566	66.484	18120712
solcap_snp_c2_43564	66.4841	18136749
solcap_snp_c2_43568	66.4842	18167048
solcap_snp_c2_54821	66.4843	18258618
solcap_snp_c2_54825	66.4844	18262872
solcap_snp_c1_14700	66.4845	18295841
solcap_snp_c1_5058	66.7035	18632465
solcap_snp_c2_15714	67.0006	18646464
solcap_snp_c1_5049	67.501	18715800
solcap_snp_c2_15679	67.5011	18719571
solcap_snp_c2_15681	67.5852	18720577
solcap_snp_c2_15690	67.6671	18908440
solcap_snp_c2_15700	67.6672	18944158
PotVar0001208	67.6673	18944476
solcap_snp_c2_15701	67.6674	18944672
PotVar0001227	67.6675	18945066
PotVar0001247	67.6676	18945486
PotVar0001266	67.6677	18945878
PotVar0001271	67.6678	18946166
PotVar0001272	67.7927	18946167
solcap_snp_c2_15722	67.7928	19108700
solcap_snp_c2_15730	67.7929	19371368
solcap_snp_c2_15733	67.793	19371864
solcap_snp_c2_15739	67.7931	19426468
solcap_snp_c2_15742	67.7932	19443483
PotVar0001290	67.7933	19621751
PotVar0001295	67.7934	19621901
PotVar0001308	67.7935	19622476
solcap_snp_c1_6338	67.7936	19622602
PotVar0001317	67.7937	19622665
PotVar0001318	67.7938	19622669
PotVar0001360	67.7939	19623712
PotVar0001385	67.794	19636774
solcap_snp_c2_52042	67.7941	20248106
solcap_snp_c2_52058	67.7942	20265189
solcap_snp_c2_52057	67.7943	20265893
solcap_snp_c2_52056	67.7944	20273756
solcap_snp_c2_52053	67.7945	20274281
PotVar0001435	67.7946	20274304
PotVar0001436	67.7947	20274370
solcap_snp_c2_52052	67.7948	20274504
PotVar0001451	67.7949	20274664
solcap_snp_c2_52044	67.795	20318178
solcap_snp_c1_15192	67.7951	20318671
solcap_snp_c2_53218	67.7952	20361043
solcap_snp_c2_53239	67.7953	20365891
solcap_snp_c2_53223	67.7954	20390111
solcap_snp_c2_53225	67.7955	20390436
solcap_snp_c1_15537	67.7956	20390896
solcap_snp_c2_43931	67.9365	22527848
solcap_snp_c2_57189	67.9366	22711151
solcap_snp_c1_15550	67.9367	22753799
solcap_snp_c1_15551	67.9368	22764258
PotVar0001513	67.9369	23031923
PotVar0001525	67.937	23032421
solcap_snp_c2_49322	68.281	25090309
solcap_snp_c2_49323	68.2811	25092573
solcap_snp_c2_32001	68.2812	27168056
solcap_snp_c2_49480	68.2813	27572379
PotVar0001004	68.2814	28304580
PotVar0001006	68.2815	28304621
PotVar0001067	68.2816	28305831
solcap_snp_c2_56304	68.2817	28306604
solcap_snp_c2_50537	68.2818	29038648
solcap_snp_c1_14873	68.2819	29043050
solcap_snp_c1_16345	68.282	29417480
solcap_snp_c2_56407	68.2821	29417773
solcap_snp_c1_14846	68.2822	30464917
solcap_snp_c2_50449	68.2823	30468392
solcap_snp_c1_15613	68.2824	30643875
PotVar0018013	68.6551	31662313
solcap_snp_c2_49587	68.6552	31735749
solcap_snp_c1_4464	68.6553	32104744
solcap_snp_c1_4455	68.6554	32421001
solcap_snp_c1_4454	68.6555	32680860
solcap_snp_c2_13865	68.6556	32758033
solcap_snp_c2_13858	68.6557	32845886
solcap_snp_c2_13856	68.6558	32845925
solcap_snp_c1_4457	68.6559	32992638
solcap_snp_c2_38256	68.656	33087182
solcap_snp_c2_38252	68.6561	33270249
PotVar0018043	68.7124	33966509
solcap_snp_c2_54243	68.8865	34272930
PotVar0123271	68.8866	34470278
solcap_snp_c2_49384	69.0079	34686122
solcap_snp_c2_49385	69.0238	34686144
solcap_snp_c2_53600	69.127	35190884
solcap_snp_c2_54576	69.1597	35385884
solcap_snp_c2_54572	69.1598	35390225
solcap_snp_c2_38365	69.1599	35572771
solcap_snp_c2_38364	69.16	35572914
solcap_snp_c2_38356	69.1601	35576954
solcap_snp_c2_46977	69.1602	36650144
solcap_snp_c2_50231	69.1603	36834630
solcap_snp_c2_50234	69.1604	36835027
solcap_snp_c2_48422	69.1605	37236177
solcap_snp_c2_47966	69.1606	38614493
solcap_snp_c2_47980	69.1607	38630855
solcap_snp_c1_14404	69.1608	39205488
solcap_snp_c1_14403	69.1609	39205522
solcap_snp_c2_48723	69.161	39211022
solcap_snp_c2_57241	69.1611	39678218
solcap_snp_c2_57243	69.1612	39678348
solcap_snp_c2_57245	69.1613	39681703
solcap_snp_c2_52397	69.1614	40450599
solcap_snp_c2_40088	69.1615	41539479
solcap_snp_c2_40089	69.1616	41539529
solcap_snp_c1_11870	69.1617	41541268
solcap_snp_c2_40092	69.2334	41542623
solcap_snp_c2_47389	72.0505	42168348
solcap_snp_c2_47390	72.0506	42168379
solcap_snp_c2_47392	72.0507	42176544
solcap_snp_c2_47393	72.218	42190428
solcap_snp_c2_47394	72.2181	42190699
solcap_snp_c2_47395	72.2182	42196548
solcap_snp_c1_14086	72.2183	42206237
solcap_snp_c1_14087	72.2184	42206267
solcap_snp_c2_47396	72.7511	42257908
solcap_snp_c2_47397	72.834	42258332
solcap_snp_c2_47399	72.8341	42259246
solcap_snp_c2_5006	72.8342	42300405
solcap_snp_c1_1802	72.8343	42300779
solcap_snp_c2_5003	72.8344	42302259
solcap_snp_c2_5221	72.8345	42524215
solcap_snp_c2_5217	72.8346	42535757
solcap_snp_c2_5216	73.0878	42535889
solcap_snp_c2_5215	73.3326	42894565
solcap_snp_c2_5214	73.3327	42894591
solcap_snp_c2_5212	73.3328	42898344
solcap_snp_c1_1881	73.3329	42992190
solcap_snp_c2_5155	74.6344	43218138
solcap_snp_c2_5154	74.6345	43218223
solcap_snp_c2_5152	74.6346	43218321
solcap_snp_c2_5151	74.6347	43218399
PotVar0106523	74.6348	43218705
solcap_snp_c2_5150	74.6349	43218748
solcap_snp_c1_1874	74.635	43218843
PotVar0106514	74.7509	43218903
PotVar0106504	75.0194	43219032
PotVar0106500	75.0195	43219104
PotVar0106496	75.024	43219176
PotVar0106493	75.0241	43219233
solcap_snp_c2_5149	75.0242	43219267
solcap_snp_c2_5137	75.193	43300256
PotVar0034071	76.3866	43919119
PotVar0034003	76.3867	43919821
PotVar0033996	77.0887	43919985
PotVar0033995	77.0888	43919996
PotVar0033978	77.0889	43920269
solcap_snp_c1_16071	78.9253	44448583
solcap_snp_c1_15965	78.9254	44622109
solcap_snp_c2_44373	79.1535	44945062
solcap_snp_c2_44375	79.7089	44945205
solcap_snp_c1_13068	79.709	45125984
solcap_snp_c1_12003	79.7709	45542672
solcap_snp_c2_40776	81.7648	45544150
solcap_snp_c1_11998	81.7649	45545592
solcap_snp_c1_11996	81.8526	45545694
solcap_snp_c1_12016	81.8527	45546170
solcap_snp_c1_12015	81.8528	45546177
solcap_snp_c2_40821	81.8529	45546574
solcap_snp_c1_12014	81.9731	45598757
solcap_snp_c2_50841	82.6834	45880461
solcap_snp_c2_50840	82.6835	45880548
solcap_snp_c2_16446	82.6836	45910606
solcap_snp_c2_51570	84.3647	45950766
solcap_snp_c2_51591	84.6237	45992075
solcap_snp_c2_51583	84.6238	46019994
solcap_snp_c2_51582	84.6239	46020091
solcap_snp_c2_51578	84.9908	46046095
solcap_snp_c2_49653	85.3782	46323215
solcap_snp_c2_49820	85.3783	46363167
solcap_snp_c1_14684	85.4563	46454617
solcap_snp_c2_49832	86.6507	46553296
solcap_snp_c2_46941	87.13	46891499
solcap_snp_c1_13941	87.5414	46903123
solcap_snp_c1_12424	87.5415	47001476
solcap_snp_c2_42384	87.5416	47095159
solcap_snp_c2_42382	87.5417	47097495
solcap_snp_c1_12414	87.5604	47122961
solcap_snp_c2_42374	87.5618	47146520
solcap_snp_c1_12447	87.562	47309125
solcap_snp_c1_12444	87.5651	47309576
solcap_snp_c1_12439	87.9669	47324660
solcap_snp_c1_16068	87.967	47386993
solcap_snp_c1_16067	87.9671	47387016
solcap_snp_c2_49128	88.4691	47454994
PotVar0126227	88.7972	47478152
PotVar0126177	88.7973	47479365
solcap_snp_c2_49147	88.7974	47506482
solcap_snp_c2_49116	88.7975	47535067
solcap_snp_c2_49117	88.7976	47557989
solcap_snp_c2_49124	88.975	47573236
solcap_snp_c2_10410	89.4721	47747766
solcap_snp_c2_10411	89.4722	47747794
solcap_snp_c1_3374	90.8998	47885675
solcap_snp_c1_3375	90.8999	47886732
solcap_snp_c2_10179	90.9	47895875
PotVar0081319	92.2371	47988995
PotVar0081337	92.2372	47989133
PotVar0081357	92.2373	47989333
PotVar0081359	92.2374	47989372
PotVar0081371	92.2375	47989583
solcap_snp_c1_3392	92.2376	47991614
solcap_snp_c1_3393	92.2377	47991663
solcap_snp_c2_10269	92.8922	48136202
PotVar0081471	93.3232	48216702
PotVar0081524	93.3233	48218145
PotVar0081529	93.3234	48218307
PotVar0081536	93.3235	48218410
PotVar0081566	93.3236	48218714
PotVar0081574	93.3237	48218879
solcap_snp_c2_10291	93.958	48255597
solcap_snp_c2_10292	93.9581	48256175
solcap_snp_c2_10296	94.4787	48267594
solcap_snp_c2_10338	94.8737	48410057
solcap_snp_c2_10339	94.8738	48410135
solcap_snp_c2_10342	95.5492	48495958
solcap_snp_c2_10343	95.5493	48497210
PotVar0081615	95.5494	48506716
PotVar0081622	95.5495	48506868
PotVar0081633	95.5496	48507066
PotVar0081681	95.5497	48509887
PotVar0081696	95.5498	48567302
PotVar0081707	95.7	48567544
PotVar0081723	95.9552	48567750
PotVar0081749	95.9553	48568302
solcap_snp_c2_10378	96.3551	48573896
solcap_snp_c2_10381	96.3552	48574160
PotVar0081821	96.7352	48642674
PotVar0081840	96.7353	48642893
PotVar0081866	96.7354	48643095
PotVar0081868	96.7355	48643105
PotVar0081880	96.7356	48643371
PotVar0081987	96.7357	48644605
PotVar0082001	96.7358	48644739
PotVar0082002	96.7359	48647426
PotVar0082012	96.9835	48647592
PotVar0082041	96.9836	48659808
PotVar0082079	96.9837	48660381
PotVar0082093	96.9838	48661571
PotVar0082094	96.9839	48661641
PotVar0082100	96.984	48661750
PotVar0082107	96.9841	48661906
PotVar0082108	96.9842	48661936
PotVar0082122	97.0451	48662311
PotVar0082130	97.0452	48662694
PotVar0082142	97.0453	48662937
solcap_snp_c2_54372	97.3551	48878549
solcap_snp_c2_54371	97.3552	48887625
solcap_snp_c2_54370	97.3553	48887667
solcap_snp_c2_54368	97.3554	48888060
solcap_snp_c2_54365	97.3555	48888480
solcap_snp_c2_54364	97.3556	48888489
PotVar0123206	98.3718	49045164
PotVar0123201	98.677	49045210
PotVar0123199	98.6771	49045250
PotVar0123189	99.3265	49045471
PotVar0123186	99.3266	49045527
solcap_snp_c2_42542	99.8241	49045619
solcap_snp_c2_42405	99.8242	49092589
solcap_snp_c2_42406	99.8243	49094498
solcap_snp_c1_12456	99.8244	49137271
solcap_snp_c2_42450	99.984	49177407
solcap_snp_c2_42451	99.9841	49177458
solcap_snp_c2_42452	99.9842	49177482
solcap_snp_c2_42461	99.9843	49185487
PotVar0123144	99.9844	49203315
PotVar0123127	99.9845	49203459
solcap_snp_c2_42475	100.104	49242992
PotVar0123091	100.104	49243260
PotVar0123056	100.104	49243810
PotVar0123022	100.772	49244276
PotVar0122968	100.772	49244689
PotVar0122899	100.773	49246569
PotVar0122898	100.773	49246582
solcap_snp_c2_55571	100.773	49356615
solcap_snp_c2_55239	100.773	49460622
solcap_snp_c2_55241	100.773	49467088
solcap_snp_c2_55240	100.847	49467229
solcap_snp_c2_8356	101.16	49719416
PotVar0128236	101.16	49728003
PotVar0128222	102.111	49728170
PotVar0128144	102.111	49729989
PotVar0128091	102.111	49730536
PotVar0128071	102.111	49730713
PotVar0128021	102.111	49731608
solcap_snp_c2_8426	102.111	49736378
solcap_snp_c2_8427	102.111	49736422
solcap_snp_c2_8428	102.111	49736471
solcap_snp_c2_8431	102.111	49737818
solcap_snp_c2_8432	102.111	49737851
solcap_snp_c2_8240	102.112	49804489
solcap_snp_c2_8253	102.112	49835932
solcap_snp_c2_8254	102.112	49835986
solcap_snp_c2_8278	102.112	49851548
solcap_snp_c2_8295	102.112	49888144
solcap_snp_c2_8332	103.224	50121333
solcap_snp_c1_2840	103.989	50246886
PotVar0034989	103.989	50251273
PotVar0034986	103.989	50251388
PotVar0034973	103.989	50251776
PotVar0034971	103.989	50251866
PotVar0034966	104.491	50252055
solcap_snp_c1_2865	104.85	50396941
solcap_snp_c2_8507	104.85	50583686
solcap_snp_c2_8522	104.85	50584727
solcap_snp_c1_2917	105.87	50772700
PotVar0034952	105.87	50863286
PotVar0034941	105.87	50863473
PotVar0034932	105.871	50863563
PotVar0034887	105.871	50863991
PotVar0034886	105.871	50864016
PotVar0034862	105.871	50864328
solcap_snp_c2_8210	105.871	50922126
PotVar0034819	108.177	51319479
PotVar0034812	108.178	51319581
PotVar0034726	108.66	51320628
solcap_snp_c2_3512	108.672	51477749
solcap_snp_c1_1177	108.672	51501967
PotVar0034688	110.187	51682609
solcap_snp_c2_3452	110.187	51696835
solcap_snp_c2_3451	110.187	51697156
PotVar0034582	110.187	51697894
PotVar0034578	110.187	51697965
solcap_snp_c1_1124	110.187	51698153
PotVar0034567	110.187	51698206
PotVar0034560	110.187	51698390
solcap_snp_c1_1094	110.335	51771399
solcap_snp_c1_1091	110.335	51776054
solcap_snp_c1_1077	110.335	51830050
PotVar0034467	111.06	51892968
PotVar0034408	111.06	51893577
PotVar0034400	111.06	51893727
solcap_snp_c1_1251	111.685	51976952
solcap_snp_c1_1250	111.685	51978384
solcap_snp_c2_3585	111.685	51988571
solcap_snp_c1_1216	111.686	51998374

## Sheet: chr6
Supplementary Table 3. Molecular markers linkage map of chromosome 6.
Marker	Position (cM)	Physical Position
PotVar0083550	0.0001	103873
PotVar0083537	0.0002	104014
PotVar0083536	0.0003	104091
PotVar0083434	0.0004	106510
PotVar0083431	0.0005	106590
solcap_snp_c2_43935	0.000600001	163949
solcap_snp_c2_43937	0.000700001	165178
solcap_snp_c2_54011	0.401104	195511
solcap_snp_c2_54010	0.401204	226737
solcap_snp_c1_15726	0.401304	238858
solcap_snp_c2_30631	0.401404	314510
solcap_snp_c2_30652	0.401504	329901
solcap_snp_c1_9224	0.401604	368267
PotVar0083330	0.691357	371043
PotVar0083248	0.691457	374612
PotVar0083246	0.691557	374684
PotVar0083214	0.894523	375955
PotVar0083119	0.894623	379327
PotVar0083102	0.894723	379618
PotVar0083053	0.894823	381418
PotVar0082947	1.0063	387949
PotVar0082918	1.0066	388318
PotVar0082845	1.00724	396098
solcap_snp_c2_30492	1.00734	396389
solcap_snp_c1_9229	1.33853	398132
solcap_snp_c2_30495	1.33863	398244
solcap_snp_c2_30507	1.60788	410239
solcap_snp_c2_30509	1.60798	410471
solcap_snp_c2_30511	1.60808	411086
solcap_snp_c2_30534	2.38097	471273
solcap_snp_c2_30566	2.84204	549710
solcap_snp_c1_9250	2.84214	627882
solcap_snp_c2_30585	3.57931	657656
solcap_snp_c2_30594	3.78995	764530
solcap_snp_c2_30595	3.79005	764621
solcap_snp_c2_30612	3.79015	833354
solcap_snp_c2_36454	3.79025	1179882
solcap_snp_c2_36443	4.55584	1207075
solcap_snp_c2_36427	4.5566	1213731
solcap_snp_c1_10873	4.5567	1242783
solcap_snp_c2_36402	4.91136	1288686
solcap_snp_c2_36400	5.32793	1288828
solcap_snp_c2_36393	5.32803	1303853
solcap_snp_c2_36460	6.91371	1612506
solcap_snp_c2_36456	6.91381	1614261
solcap_snp_c2_36391	6.91391	1641410
solcap_snp_c2_36390	7.17409	1642451
solcap_snp_c2_36388	7.17419	1642570
solcap_snp_c2_36370	7.17429	1648043
solcap_snp_c2_53250	7.5169	1801624
solcap_snp_c1_13641	7.64222	1832292
solcap_snp_c1_13638	7.64232	1832894
solcap_snp_c1_13636	8.06592	1877188
solcap_snp_c2_45974	8.34258	1911161
solcap_snp_c2_45973	8.34268	1911169
solcap_snp_c2_45971	8.34278	1923484
solcap_snp_c2_46016	9.28315	2027276
solcap_snp_c1_13644	9.28325	2065804
solcap_snp_c2_46002	9.28335	2074295
solcap_snp_c2_55557	9.54371	2166162
solcap_snp_c2_55556	9.65025	2166517
solcap_snp_c2_55553	9.65035	2182330
solcap_snp_c2_57291	9.65045	2270659
solcap_snp_c2_38293	11.6348	2591073
solcap_snp_c1_11418	11.8316	2713822
solcap_snp_c2_38323	11.8317	2713850
solcap_snp_c2_38330	11.8318	2819027
solcap_snp_c2_38333	11.8337	2848187
solcap_snp_c2_38339	11.8338	2853244
solcap_snp_c2_27596	13.4385	3153996
solcap_snp_c2_27590	13.4386	3167984
PotVar0027083	13.4387	3213197
PotVar0027076	13.4388	3213305
PotVar0027050	13.4389	3213458
PotVar0027031	13.439	3213812
solcap_snp_c2_27588	13.4391	3214083
PotVar0026995	13.4392	3214250
PotVar0026902	13.4396	3215512
solcap_snp_c2_27582	13.4399	3246810
solcap_snp_c2_27574	13.4402	3295487
solcap_snp_c2_27563	13.4404	3335960
PotVar0026734	13.4407	3432475
PotVar0026695	13.6271	3433593
PotVar0026688	13.6272	3433746
solcap_snp_c2_27607	13.6273	3440812
solcap_snp_c2_27571	13.8057	3469120
solcap_snp_c2_27565	13.8058	3470372
solcap_snp_c2_27564	13.8059	3470384
solcap_snp_c1_922	13.8124	3524144
solcap_snp_c1_921	14.0864	3525858
solcap_snp_c2_3137	14.0865	3551293
solcap_snp_c2_3135	14.0866	3551683
solcap_snp_c2_3134	14.1754	3555939
solcap_snp_c2_3133	14.2637	3555942
solcap_snp_c2_3127	14.3528	3823781
solcap_snp_c2_3109	14.3529	3974752
solcap_snp_c2_3108	14.353	3974830
solcap_snp_c2_3107	14.7307	4082786
solcap_snp_c2_3106	14.7308	4082852
solcap_snp_c2_3104	14.7309	4151533
solcap_snp_c2_3092	14.731	4177003
solcap_snp_c2_3091	14.7311	4177195
solcap_snp_c2_3174	15.3356	4419112
solcap_snp_c2_3172	15.3357	4419342
solcap_snp_c2_3167	15.3392	4444482
solcap_snp_c2_3166	15.7791	4444574
solcap_snp_c2_3165	15.7792	4444678
solcap_snp_c2_3162	15.7793	4473040
solcap_snp_c2_3158	15.9868	4670128
solcap_snp_c2_56971	15.9869	4701224
solcap_snp_c2_56974	15.987	4702155
solcap_snp_c2_3155	15.9871	4826262
solcap_snp_c2_3153	15.9872	4848840
solcap_snp_c1_925	15.9873	4850123
solcap_snp_c2_3146	16.4621	5048456
solcap_snp_c2_3142	17.6749	5249890
solcap_snp_c2_3145	17.675	5520109
solcap_snp_c2_36712	17.6751	5849852
solcap_snp_c2_36711	17.6752	5849928
solcap_snp_c2_36710	17.6753	5849993
solcap_snp_c2_36709	17.8266	5850053
solcap_snp_c1_10935	17.8267	5850803
solcap_snp_c1_10934	17.8268	5851192
solcap_snp_c2_36708	18.0738	5852757
solcap_snp_c1_10932	18.0967	5864065
solcap_snp_c2_36706	18.0968	5895227
solcap_snp_c2_36703	18.6966	5993515
solcap_snp_c1_10938	19.1705	6071303
solcap_snp_c1_10939	19.3977	6099875
solcap_snp_c2_36721	19.3978	6100004
solcap_snp_c2_56259	19.7396	6388474
solcap_snp_c2_46993	19.7397	6422780
solcap_snp_c2_46994	19.7398	6422832
solcap_snp_c2_46995	19.7399	6423296
solcap_snp_c2_46997	19.74	6423476
solcap_snp_c2_46998	19.7401	6423713
solcap_snp_c2_47002	19.7402	6445075
solcap_snp_c2_33932	19.7403	6903226
solcap_snp_c2_33933	19.7404	6903541
solcap_snp_c2_50190	19.7405	7261057
solcap_snp_c2_50188	19.7406	7261400
solcap_snp_c2_50186	19.7407	7262487
solcap_snp_c2_50183	19.7408	7262763
solcap_snp_c2_50182	19.7409	7262879
solcap_snp_c2_50180	19.741	7263350
solcap_snp_c2_50179	19.7411	7263358
solcap_snp_c2_50207	19.8571	7407390
solcap_snp_c2_50199	19.8572	7409026
solcap_snp_c1_16656	19.8573	7484322
solcap_snp_c1_16657	19.8574	7488633
solcap_snp_c2_54340	19.8575	7970444
solcap_snp_c1_15811	19.8576	7995004
solcap_snp_c2_24266	19.8577	8312329
solcap_snp_c1_7716	19.8578	8312731
solcap_snp_c1_7721	19.8579	8314991
solcap_snp_c2_57226	19.9873	8452455
solcap_snp_c2_57230	19.9874	8453586
solcap_snp_c2_24279	19.9875	8675856
solcap_snp_c2_24280	20.189	8676391
solcap_snp_c2_24287	20.1891	8678484
solcap_snp_c2_46048	21.9206	9782622
solcap_snp_c2_17377	21.9207	10240158
solcap_snp_c2_17378	21.9208	10240254
solcap_snp_c2_17379	21.9209	11038269
solcap_snp_c2_17380	21.921	11038742
solcap_snp_c2_26498	21.9211	11223944
solcap_snp_c2_26499	22.2507	11224867
solcap_snp_c2_26500	22.2508	11224953
solcap_snp_c2_33105	22.2509	12032376
PotVar0086289	22.251	12568369
PotVar0086307	22.2511	12615306
solcap_snp_c2_18787	22.2512	15778047
PotVar0040740	22.2513	16055529
solcap_snp_c1_9601	22.2514	17393943
solcap_snp_c2_58126	22.2515	17700454
solcap_snp_c2_56793	22.3682	20312642
solcap_snp_c2_56794	22.3683	20312683
solcap_snp_c1_16621	22.4735	21067273
solcap_snp_c2_33233	22.4736	21259391
solcap_snp_c2_33228	22.4737	21375520
PotVar0083629	22.4738	21731140
PotVar0083638	22.5951	21744248
PotVar0024432	22.5952	22591417
PotVar0024451	22.5953	23235096
solcap_snp_c2_12403	22.5954	23814407
solcap_snp_c2_12402	22.5955	23933179
solcap_snp_c2_12400	22.5956	24508161
solcap_snp_c2_12399	22.5957	24508249
solcap_snp_c2_12398	22.5958	24510112
solcap_snp_c1_14880	22.9934	24858593
solcap_snp_c2_4594	22.9935	25519230
PotVar0003983	22.9936	26014399
solcap_snp_c2_55661	23.1224	26935261
solcap_snp_c2_24052	23.1225	27418548
solcap_snp_c2_24050	23.1226	27490699
solcap_snp_c2_32893	23.1227	28434793
solcap_snp_c2_32894	23.1228	28434931
solcap_snp_c2_35590	23.1229	28621753
solcap_snp_c2_35592	23.123	28886273
solcap_snp_c2_11293	23.5287	29589233
PotVar0069582	23.7413	29620440
PotVar0069473	23.7414	29622205
PotVar0069471	23.7415	29622294
solcap_snp_c2_11286	24.3686	29797293
solcap_snp_c2_11287	24.3687	29945939
solcap_snp_c2_11289	24.3688	29947610
PotVar0069383	24.3689	29956558
solcap_snp_c2_11303	25.148	30365962
solcap_snp_c2_11309	25.1481	30379521
solcap_snp_c2_11310	25.1482	30381815
solcap_snp_c2_11312	25.1483	30382091
solcap_snp_c2_11313	25.1484	30382462
solcap_snp_c2_11314	25.1485	30382472
solcap_snp_c2_11315	25.1486	30382751
solcap_snp_c2_11316	25.1487	30382874
solcap_snp_c2_11318	25.1488	30384618
solcap_snp_c2_11330	25.1489	30443070
solcap_snp_c2_11333	25.149	30443155
solcap_snp_c2_11334	26.0398	30455863
solcap_snp_c1_3687	26.0399	30456106
solcap_snp_c1_3689	26.3498	30466255
solcap_snp_c1_3691	26.5469	30647661
solcap_snp_c2_52569	27.0803	30915096
PotVar0131933	27.0804	31098955
PotVar0131893	27.0805	31100247
PotVar0131880	27.0806	31111001
PotVar0131877	27.0807	31111135
solcap_snp_c2_36595	27.0808	31135283
solcap_snp_c2_36590	27.6926	31441466
solcap_snp_c2_32952	29.0642	31590352
solcap_snp_c2_32941	29.7134	31631287
solcap_snp_c2_32940	29.7135	31631356
solcap_snp_c2_32938	29.7136	31631446
solcap_snp_c2_32924	29.7137	31746359
solcap_snp_c2_32919	30.4086	31800267
solcap_snp_c2_32918	30.4087	31830854
solcap_snp_c2_32917	30.5963	32097692
solcap_snp_c1_9846	30.6092	32103689
solcap_snp_c2_34003	30.6093	32433919
solcap_snp_c1_10157	31.3761	32541853
solcap_snp_c2_38663	31.3762	33776207
solcap_snp_c1_13871	31.3763	33814201
solcap_snp_c2_50215	32.9522	34197058
PotVar0096925	32.9523	34293579
PotVar0096921	32.9524	34293703
PotVar0096920	33.6344	34293790
PotVar0096874	33.6345	34294457
solcap_snp_c2_50222	33.6351	34311641
solcap_snp_c2_50221	33.9779	34311754
solcap_snp_c2_50220	33.978	34311834
PotVar0090228	34.624	34557262
solcap_snp_c1_8603	34.6241	34825744
solcap_snp_c2_27867	34.6242	34893250
solcap_snp_c2_27866	34.6243	34893351
solcap_snp_c2_27865	34.6244	34893352
solcap_snp_c2_27863	34.9368	34950532
solcap_snp_c2_55596	35.2658	35077510
PotVar0090320	35.5798	35098458
PotVar0090345	35.5799	35100352
PotVar0090355	36.818	35100674
solcap_snp_c2_27846	36.8181	35147527
solcap_snp_c1_8597	36.8182	35150905
PotVar0090378	36.8227	35465160
solcap_snp_c2_24297	37.1811	35798871
solcap_snp_c2_24300	37.1812	35809836
PotVar0093261	37.1813	35816261
PotVar0093231	37.1814	35816679
PotVar0093229	37.1815	35816685
PotVar0093200	37.1816	35816995
PotVar0093175	37.2021	35817271
solcap_snp_c2_24321	37.8184	35965178
solcap_snp_c2_24322	38.5021	36214491
solcap_snp_c2_24323	38.5621	36214614
solcap_snp_c1_13422	38.9722	36435709
solcap_snp_c1_12409	40.8616	36765007
solcap_snp_c2_42346	41.1417	36881092
solcap_snp_c2_42347	41.1418	36881194
solcap_snp_c2_42348	41.1419	36881223
solcap_snp_c2_42349	41.142	36881380
solcap_snp_c2_42350	41.1421	36881392
solcap_snp_c2_42351	41.1422	36881468
solcap_snp_c2_42353	41.1423	36882933
solcap_snp_c2_42354	41.1424	36883178
solcap_snp_c2_42355	41.1425	36883186
solcap_snp_c2_37626	41.1426	37258967
solcap_snp_c2_37603	41.736	37390413
solcap_snp_c2_37611	42.3419	37482850
solcap_snp_c2_37615	42.342	37528473
solcap_snp_c2_37623	42.6051	37560889
solcap_snp_c2_43093	42.6052	37602254
solcap_snp_c1_12691	42.6053	37867794
PotVar0104776	42.6054	37868566
PotVar0104750	42.6055	37868876
PotVar0104741	42.6056	37869180
PotVar0104740	42.6057	37869257
solcap_snp_c2_43068	42.6058	37883612
solcap_snp_c2_43059	42.8261	37940976
solcap_snp_c2_43056	42.8262	37941540
solcap_snp_c2_43109	43.1689	37969924
solcap_snp_c2_43064	43.4933	38059242
solcap_snp_c2_43106	43.5184	38067148
PotVar0104739	44.0839	38182375
PotVar0104705	44.084	38183061
PotVar0104703	44.0841	38183123
PotVar0104660	44.0842	38183646
PotVar0104638	44.4039	38183860
solcap_snp_c2_51774	44.4445	38208809
solcap_snp_c2_51772	44.4446	38210696
solcap_snp_c2_51771	44.4447	38210711
solcap_snp_c2_51769	44.4448	38211153
solcap_snp_c2_51764	44.4449	38211559
solcap_snp_c2_51761	44.445	38211801
solcap_snp_c2_51760	44.4451	38211989
solcap_snp_c2_51758	44.4452	38212118
solcap_snp_c2_51757	44.4453	38212853
solcap_snp_c2_56059	44.4454	38291420
solcap_snp_c2_56057	44.4455	38291714
solcap_snp_c2_56056	44.4456	38291760
solcap_snp_c2_54220	45.1708	38458958
PotVar0134018	45.338	38707476
solcap_snp_c2_57888	45.4921	38707786
PotVar0133948	45.4922	38708735
PotVar0133907	45.4923	38709362
PotVar0133895	45.4924	38709550
solcap_snp_c2_57892	45.4925	38710018
solcap_snp_c2_33372	45.4926	38739115
solcap_snp_c2_33314	45.4927	38754845
solcap_snp_c2_33364	45.7617	38781651
solcap_snp_c2_33375	45.7618	38883066
solcap_snp_c2_56323	45.7619	38959953
solcap_snp_c2_33304	46.8939	39056496
solcap_snp_c2_33307	46.894	39058178
PotVar0054938	46.8941	39140862
solcap_snp_c2_33354	47.2552	39273450
solcap_snp_c2_51480	47.2553	39539088
solcap_snp_c2_31585	48.3472	39783311
solcap_snp_c2_31586	48.3473	39792242
solcap_snp_c2_31592	48.3474	39793124
solcap_snp_c2_31600	48.3475	39876347
solcap_snp_c2_31605	48.3476	39882582
solcap_snp_c2_31642	48.5819	39994899
solcap_snp_c2_31648	49.0983	40171177
solcap_snp_c2_40266	50.6941	40585733
solcap_snp_c2_45833	51.3914	40884702
solcap_snp_c1_13599	51.3915	40905107
solcap_snp_c2_45837	51.3916	40905486
solcap_snp_c2_52385	51.8925	41061435
solcap_snp_c2_52390	51.8926	41062247
solcap_snp_c2_52391	51.8927	41062254
solcap_snp_c2_52392	52.6554	41071812
solcap_snp_c2_48886	52.6555	41241077
PotVar0087343	54.5959	41407323
PotVar0087356	54.596	41407566
solcap_snp_c2_55083	54.5961	41408590
PotVar0087396	55.128	41506707
PotVar0087403	55.6897	41506810
solcap_snp_c2_54029	56.2145	41520176
solcap_snp_c2_49048	56.2146	41926673
solcap_snp_c2_49052	56.2147	41927092
solcap_snp_c2_49053	56.2148	41927126
solcap_snp_c2_49060	56.3703	41970290
solcap_snp_c2_43135	56.3704	42626082
PotVar0127327	57.14	42631808
PotVar0127317	57.1401	42632023
PotVar0127288	57.1402	42632388
PotVar0127275	57.1403	42632551
PotVar0127264	57.1404	42632752
PotVar0127254	57.1405	42632875
solcap_snp_c2_57014	57.1406	42746310
solcap_snp_c2_57015	57.3059	42746334
solcap_snp_c2_57016	57.306	42750769
solcap_snp_c2_57018	57.3061	42764269
solcap_snp_c2_57019	57.3062	42764312
solcap_snp_c2_43123	57.3063	42821213
solcap_snp_c2_43124	57.3064	42830329
PotVar0127210	57.3065	42866855
PotVar0127173	57.3066	42867595
PotVar0127165	57.3067	42867728
PotVar0127129	57.3068	42868382
solcap_snp_c2_43127	57.6806	42877139
solcap_snp_c2_57408	58.1573	43085205
solcap_snp_c2_57409	58.1574	43085216
solcap_snp_c2_57412	58.1575	43086245
solcap_snp_c2_37770	58.1576	43114810
solcap_snp_c2_37776	58.1577	43117793
solcap_snp_c2_37783	58.1578	43149241
solcap_snp_c1_11276	58.9621	43183046
solcap_snp_c2_37756	59.6829	43260421
solcap_snp_c2_37759	59.9548	43280128
PotVar0119435	59.9549	43296060
PotVar0119450	60.4406	43296268
solcap_snp_c2_37767	60.806	43331605
solcap_snp_c2_37774	61.6966	43349985
solcap_snp_c2_55700	61.6967	43621182
solcap_snp_c2_52767	61.6968	43689851
solcap_snp_c2_52768	61.6969	43695436
solcap_snp_c2_39626	62.1624	43890215
solcap_snp_c2_39627	62.1625	43893360
solcap_snp_c1_11707	62.597	43950578
solcap_snp_c2_57172	64.8871	44030918
PotVar0133544	64.8872	44031292
PotVar0133545	64.8873	44031326
PotVar0133549	65.0401	44031395
PotVar0133565	65.0402	44031534
solcap_snp_c2_53055	65.0403	44075992
solcap_snp_c2_53053	65.3063	44119412
solcap_snp_c2_49883	65.3064	44166068
solcap_snp_c2_49889	65.3065	44271906
solcap_snp_c2_49885	65.3299	44303698
solcap_snp_c2_47782	65.7624	44393449
solcap_snp_c2_47775	67.0256	44548388
solcap_snp_c1_12051	67.0257	44608732
solcap_snp_c2_47484	67.0258	44775802
solcap_snp_c2_47495	68.0441	44929713
solcap_snp_c2_56132	68.4507	45015624
solcap_snp_c2_36151	68.6187	45136332
solcap_snp_c2_36123	68.9342	45245848
solcap_snp_c1_10838	68.9343	45267438
solcap_snp_c1_8140	70.1567	45591711
solcap_snp_c2_25959	70.1568	45785821
solcap_snp_c2_25929	70.5141	46017522
solcap_snp_c2_25926	70.5142	46018319
solcap_snp_c1_8133	70.5143	46026544
solcap_snp_c1_8132	70.5144	46026590
solcap_snp_c1_8131	70.5145	46033613
solcap_snp_c2_25947	71.1085	46145916
solcap_snp_c2_31981	72.0356	46267449
PotVar0070227	72.8207	46405062
PotVar0070225	72.8208	46405079
PotVar0070150	72.8209	46406403
PotVar0070149	72.9238	46406540
PotVar0070093	72.9239	46407508
PotVar0070088	72.924	46407621
solcap_snp_c2_54191	74.1118	46612395
PotVar0070000	74.1119	46641588
PotVar0069959	74.112	46644102
solcap_snp_c2_54195	74.4965	46662869
solcap_snp_c2_46184	75.4096	47027778
solcap_snp_c2_46171	76.0877	47053493
PotVar0085941	76.5782	47270969
PotVar0086011	76.5783	47308739
PotVar0086196	76.5784	47311208
PotVar0086198	76.5785	47311241
PotVar0086205	76.8731	47311349
solcap_snp_c2_16863	76.8732	47604700
solcap_snp_c2_16864	76.8733	47604713
solcap_snp_c2_16763	76.8814	47673826
solcap_snp_c2_16764	77.6186	47677553
solcap_snp_c2_16767	77.6187	47682330
solcap_snp_c2_16770	77.9595	47689508
solcap_snp_c2_56094	77.9596	47757532
solcap_snp_c2_16775	78.5483	47792808
solcap_snp_c2_16778	78.9033	47847667
solcap_snp_c2_16780	78.9034	48020360
solcap_snp_c2_16785	78.9035	48053032
solcap_snp_c2_16793	78.9036	48069921
solcap_snp_c2_16798	79.1232	48096663
solcap_snp_c2_16799	79.1233	48115186
solcap_snp_c2_16804	79.1234	48122388
solcap_snp_c1_5443	79.1235	48129853
solcap_snp_c2_16817	79.1236	48131679
solcap_snp_c2_16818	79.1237	48132777
solcap_snp_c2_54061	79.1238	48299993
solcap_snp_c2_54060	79.2637	48300004
solcap_snp_c2_52591	79.8074	48397976
solcap_snp_c2_52583	79.8075	48405097
solcap_snp_c1_15372	79.8076	48416425
solcap_snp_c1_15371	79.8077	48416539
PotVar0090785	79.8078	48429967
solcap_snp_c1_15368	79.8079	48433233
solcap_snp_c2_31182	80.0684	48502773
PotVar0090705	80.0685	48503606
solcap_snp_c2_31193	80.0686	48504628
solcap_snp_c2_31214	80.0687	48529862
solcap_snp_c1_9450	80.4476	48637692
solcap_snp_c2_50592	81.2395	48717286
solcap_snp_c2_50596	81.2396	48719039
PotVar0090474	81.2397	48742965
PotVar0090465	81.2398	48743077
PotVar0090460	81.2399	48743943
PotVar0090458	81.24	48744119
PotVar0090457	81.2401	48744938
PotVar0090434	81.2402	48745922
solcap_snp_c2_31139	81.3181	48874844
solcap_snp_c2_31144	81.3959	48879137
solcap_snp_c2_31180	81.4733	49130098
PotVar0084774	81.5507	49253002
PotVar0084805	81.6293	49253350
solcap_snp_c2_35902	81.6294	49260100
solcap_snp_c2_35893	81.6295	49406412
solcap_snp_c2_35889	82.188	49407305
solcap_snp_c2_33892	83.1452	49672071
solcap_snp_c2_33866	83.892	49958829
solcap_snp_c2_5836	84.1788	50088968
solcap_snp_c2_5867	84.1789	50108696
solcap_snp_c2_5869	84.179	50109162
PotVar0085113	84.3252	50132212
PotVar0085119	84.3253	50132349
solcap_snp_c2_5774	84.4645	50345164
solcap_snp_c2_5828	85.0721	50620658
solcap_snp_c1_2091	85.0722	50658278
PotVar0126392	85.181	50706694
solcap_snp_c2_5850	85.2117	50723658
PotVar0126357	85.2118	50739464
PotVar0126314	85.2119	50740170
PotVar0126275	85.4315	50741006
solcap_snp_c2_5858	85.9869	50851628
solcap_snp_c2_5864	86.167	50958083
PotVar0073880	87.4694	51269224
PotVar0073894	87.4695	51269753
PotVar0073914	87.4696	51270383
PotVar0073929	87.4697	51270813
PotVar0073982	87.4698	51359671
PotVar0073985	87.4699	51359719
PotVar0074004	87.47	51360711
PotVar0074079	87.4701	51362007
solcap_snp_c2_56141	87.4702	51365568
PotVar0074133	87.4703	51608057
solcap_snp_c2_8832	87.7091	51913883
solcap_snp_c2_8744	92.0858	52239485
solcap_snp_c1_2979	92.0859	52262018
solcap_snp_c2_8791	92.086	52264212
solcap_snp_c2_8792	92.0861	52264249
solcap_snp_c2_8793	92.0862	52264315
solcap_snp_c2_8861	92.7628	52512012
solcap_snp_c2_8897	92.9554	52597036
solcap_snp_c2_8926	92.9555	52625272
solcap_snp_c2_8942	93.4971	52671730
solcap_snp_c2_8988	94.5197	52915843
PotVar0040680	94.5198	52929083
PotVar0040624	94.5199	52932349
solcap_snp_c2_8999	94.52	52946197
solcap_snp_c2_9003	94.5201	52947899
solcap_snp_c2_9010	94.5202	52951684
solcap_snp_c2_9011	94.5203	52951756
solcap_snp_c2_8664	94.7585	53053425
solcap_snp_c2_22244	96.7352	53441243
PotVar0040540	96.7353	53487506
PotVar0040532	96.7354	53487797
solcap_snp_c1_6992	96.7355	53677174
solcap_snp_c1_6997	97.1756	53678569
PotVar0040506	97.6872	53748360
PotVar0040499	97.6873	53748510
solcap_snp_c2_22334	97.6874	53749071
PotVar0040426	97.6875	53749641
PotVar0040397	97.6876	53750164
PotVar0040358	97.6877	53752350
PotVar0040353	97.6878	53752438
PotVar0040351	97.6879	53752555
PotVar0040289	97.688	53795098
PotVar0040287	97.6881	53795163
PotVar0040262	97.6882	53795371
PotVar0040236	97.6883	53795618
PotVar0040228	98.11	53795739
solcap_snp_c1_7029	98.1101	53805395
solcap_snp_c1_7031	98.1102	53809300
solcap_snp_c1_7040	98.4771	53846583
solcap_snp_c1_7041	98.4772	53846625
PotVar0040137	98.6843	53851223
PotVar0040100	98.6844	53851845
PotVar0040071	98.6845	53852615
PotVar0040064	99.135	53852815
PotVar0039998	99.1351	53854949
solcap_snp_c2_22375	99.1352	53855168
solcap_snp_c2_22393	99.4229	53900933
PotVar0039939	99.829	53988417
PotVar0039932	99.8291	53988565
PotVar0039904	99.8292	53988827
PotVar0039893	99.8293	53989102
PotVar0039801	99.8294	53990177
solcap_snp_c2_22404	100.045	54001660
PotVar0039728	100.046	54084559
PotVar0039692	100.047	54085524
PotVar0039687	100.286	54085599
PotVar0039654	100.286	54086714
solcap_snp_c2_24245	100.286	54207192
solcap_snp_c2_24244	100.286	54207248
solcap_snp_c1_7704	100.83	54252491
solcap_snp_c1_7700	101.627	54294207
solcap_snp_c1_7695	101.627	54307625
solcap_snp_c2_24155	102.419	54350703
solcap_snp_c2_24152	102.419	54363334
solcap_snp_c1_7688	102.74	54451649
solcap_snp_c2_24115	102.74	54579441
solcap_snp_c2_24082	102.74	54670400
solcap_snp_c2_24066	104.89	54710555
solcap_snp_c2_24065	104.89	54710598
solcap_snp_c1_7681	104.89	54711868
solcap_snp_c2_24064	104.89	54713088
solcap_snp_c1_7680	104.891	54713350
solcap_snp_c1_7678	105.043	54758304
solcap_snp_c2_24233	105.195	54800760
solcap_snp_c2_57054	105.347	54904774
solcap_snp_c2_57055	105.347	54906904
solcap_snp_c2_29216	105.347	54992649
solcap_snp_c2_29204	106.388	55096901
PotVar0041202	106.388	55117552
solcap_snp_c2_29187	106.388	55186134
solcap_snp_c2_29186	106.606	55186390
solcap_snp_c1_8867	108.351	55276278
solcap_snp_c2_29165	108.352	55279401
PotVar0041199	108.352	55326607
PotVar0041174	110.72	55330315
solcap_snp_c2_29160	110.72	55330427
PotVar0041153	110.895	55330809
PotVar0041150	110.895	55330874
solcap_snp_c2_29159	110.895	55374281
PotVar0041137	110.895	55410399
PotVar0041119	110.895	55411335
solcap_snp_c2_29169	113.705	55470036
solcap_snp_c2_1950	113.705	55521678
PotVar0041048	113.705	55569881
PotVar0040998	113.705	55571460
PotVar0040975	113.705	55572089
solcap_snp_c2_56590	114.151	55744569
solcap_snp_c2_37339	114.508	55783877
solcap_snp_c2_37357	114.508	55838192
solcap_snp_c2_37358	114.508	55838196
solcap_snp_c2_37329	115.08	55889134
PotVar0127585	115.08	55906373
PotVar0127587	115.08	55906509
PotVar0127595	115.08	55906829
PotVar0127622	115.08	55907798
solcap_snp_c1_11137	115.081	55922839
solcap_snp_c1_11139	116.077	55937583
solcap_snp_c2_37350	117.106	56123395
solcap_snp_c1_11144	117.106	56135600
solcap_snp_c2_28141	117.106	56290221
solcap_snp_c1_8673	117.106	56291313
PotVar0056942	119.337	56393950
solcap_snp_c2_28107	119.734	56501000
solcap_snp_c1_8679	120.316	56735014
solcap_snp_c1_16127	122.153	56818257
solcap_snp_c2_50773	122.474	56878835
PotVar0056996	122.474	56892097
solcap_snp_c2_50802	122.754	56940118
solcap_snp_c2_50801	122.755	56940166
solcap_snp_c2_50799	122.755	56940277
solcap_snp_c2_50797	122.755	56940529
solcap_snp_c2_50796	122.755	56940758
solcap_snp_c2_50275	124.303	57113765
solcap_snp_c2_41237	124.303	57200692
solcap_snp_c2_41223	124.303	57216661
PotVar0057013	124.436	57242463
PotVar0057090	124.436	57244831
PotVar0057109	124.436	57245238
PotVar0057182	124.624	57299061
PotVar0057192	124.624	57299306
solcap_snp_c2_41210	124.624	57300223
solcap_snp_c2_41189	126.454	57354175
PotVar0057253	127.398	57527967
PotVar0057284	127.398	57528355
PotVar0057365	127.398	57529699
solcap_snp_c2_9308	128.202	57850119
solcap_snp_c1_3125	128.203	57870796
solcap_snp_c2_9269	128.203	57918228
PotVar0132752	128.203	57946572
PotVar0132760	128.203	57946877
PotVar0132831	128.203	57947859
PotVar0132840	128.203	57948000
PotVar0132848	128.261	57948166
solcap_snp_c2_9237	128.366	58122236
solcap_snp_c2_9216	131.476	58219291
solcap_snp_c2_9215	131.476	58219483
solcap_snp_c2_9214	131.476	58219576
solcap_snp_c2_9203	132.355	58259535
solcap_snp_c2_9202	132.355	58259841
solcap_snp_c2_9201	132.355	58259952
solcap_snp_c2_9193	132.451	58293159
PotVar0065875	132.666	58461783
PotVar0065888	132.666	58462012
PotVar0065921	132.666	58462796
PotVar0065992	132.666	58463672
PotVar0066048	133.715	58464368
solcap_snp_c2_9137	133.715	58541585
solcap_snp_c1_3081	133.832	58663518
solcap_snp_c2_9172	133.832	58844975
solcap_snp_c1_3090	133.833	58854774
solcap_snp_c2_22118	134.72	58973519
solcap_snp_c2_22117	134.72	58973629
solcap_snp_c1_15061	134.835	59132473
solcap_snp_c2_51428	134.835	59158312
solcap_snp_c2_51430	134.835	59158516
solcap_snp_c2_51415	139.772	59207840
solcap_snp_c1_14614	139.772	59263222

## Sheet: chr7
Supplementary Table 3. Molecular markers linkage map of chromosome 7.
Marker	Position (cM)	Physical Position
solcap_snp_c2_46081	0	539619
solcap_snp_c2_46101	0.0001	564380
solcap_snp_c2_46107	0.0002	565983
solcap_snp_c2_46110	0.0003	572511
solcap_snp_c2_46111	0.0004	572574
PotVar0022997	0.0005	586600
PotVar0022865	0.000600001	588318
PotVar0022708	0.000700001	637866
PotVar0022694	0.000800001	638064
solcap_snp_c1_11525	0.000900001	769203
PotVar0022573	0.001	795969
solcap_snp_c1_15906	0.31968	1002067
solcap_snp_c2_54651	0.31978	1002101
solcap_snp_c2_54652	0.31988	1002244
PotVar0022541	0.31998	1002272
solcap_snp_c1_15912	0.32008	1005773
solcap_snp_c1_10825	1.29632	1081996
PotVar0022443	1.88654	1119920
solcap_snp_c1_10788	3.2048	1279591
solcap_snp_c2_36068	3.2049	1279680
solcap_snp_c2_36067	3.205	1282261
solcap_snp_c1_10781	3.85061	1318870
PotVar0022397	4.17093	1348377
PotVar0022249	4.17103	1351450
solcap_snp_c1_10836	4.17113	1352928
PotVar0022148	4.59601	1502371
PotVar0022123	4.59611	1503034
PotVar0022114	4.59621	1503268
solcap_snp_c2_41690	4.59631	1532795
solcap_snp_c2_45643	6.46488	1947499
solcap_snp_c2_43960	6.75568	2300074
solcap_snp_c2_26197	7.73406	2498400
solcap_snp_c2_26296	7.73416	2531707
PotVar0130024	7.73426	2545946
PotVar0130025	7.73436	2546005
PotVar0130054	7.73446	2546954
PotVar0130065	7.73456	2548546
PotVar0130068	7.73466	2548671
PotVar0130084	7.73476	2548938
PotVar0130091	7.73486	2549024
solcap_snp_c2_26169	8.72237	2639244
solcap_snp_c2_26182	10.4858	2671927
solcap_snp_c1_8173	10.4859	2932652
solcap_snp_c2_26211	10.486	2932808
solcap_snp_c2_26238	10.4861	2972894
PotVar0102547	11.096	3039313
PotVar0102540	11.0961	3039444
PotVar0102528	11.0962	3039735
PotVar0102496	11.0963	3040224
PotVar0102399	11.0964	3041161
solcap_snp_c2_26278	12.2583	3152731
PotVar0102381	12.2584	3169984
PotVar0102374	12.5541	3170071
PotVar0102362	12.5542	3170390
PotVar0102342	12.5543	3170893
PotVar0102341	12.5544	3170961
PotVar0102326	12.5545	3171343
solcap_snp_c1_8186	12.5546	3246279
solcap_snp_c2_36818	15.0034	3476491
solcap_snp_c2_36831	15.0035	3505434
solcap_snp_c2_36832	15.0036	3505461
solcap_snp_c2_36837	15.0037	3508026
solcap_snp_c2_36838	15.0038	3508158
solcap_snp_c1_10975	15.0039	3509762
PotVar0102262	15.6086	3544632
solcap_snp_c2_36859	15.6087	3579340
solcap_snp_c2_36872	15.6088	3633771
PotVar0095918	16.4039	3889278
solcap_snp_c1_16212	16.404	3891696
PotVar0095883	16.4041	3891813
solcap_snp_c2_55830	16.4042	3891813
solcap_snp_c2_55831	16.4043	3892550
solcap_snp_c2_55832	16.4044	3892568
solcap_snp_c2_55833	16.4045	3892715
solcap_snp_c2_55835	16.4046	3892940
PotVar0095825	16.4047	3893294
solcap_snp_c1_16221	16.4048	3894102
solcap_snp_c2_55838	16.4049	3896216
solcap_snp_c1_16227	16.405	3896435
PotVar0095725	16.6376	3896586
solcap_snp_c2_52663	16.6377	3949542
solcap_snp_c2_46379	17.2223	4100017
solcap_snp_c2_46393	18.3634	4231614
solcap_snp_c2_43574	19.3147	4403363
PotVar0095632	19.3148	4465705
PotVar0095628	19.435	4465778
PotVar0095619	19.4351	4465909
PotVar0095593	19.4352	4466303
PotVar0095580	19.4353	4466518
solcap_snp_c2_43588	19.5991	4468871
PotVar0095478	19.5992	4469193
solcap_snp_c2_43607	19.5993	4530220
solcap_snp_c2_46733	19.5994	4602246
PotVar0132155	19.9558	4722686
PotVar0132139	19.9559	4722956
PotVar0132124	19.956	4723148
PotVar0132077	20.2948	4723729
PotVar0132062	20.4068	4723963
solcap_snp_c2_46749	20.42	4834362
solcap_snp_c2_46715	20.4201	4870655
solcap_snp_c2_46710	20.4202	4874743
solcap_snp_c2_46709	20.4203	4874797
solcap_snp_c2_46707	20.4204	4874927
solcap_snp_c2_46755	20.5733	4880359
solcap_snp_c2_48715	20.8919	5260432
solcap_snp_c2_52377	20.892	5781197
solcap_snp_c2_52376	20.8921	5781270
solcap_snp_c2_52374	20.8922	5791166
solcap_snp_c2_53536	21.5562	5973699
solcap_snp_c1_11942	22.1882	6046109
solcap_snp_c1_15484	22.1883	6367929
solcap_snp_c2_53046	22.1884	6374653
solcap_snp_c1_15485	22.1885	6420869
solcap_snp_c1_11935	22.3045	6466545
solcap_snp_c1_11948	22.3046	6519894
solcap_snp_c2_29386	23.2979	6666579
solcap_snp_c2_29387	23.298	6666594
solcap_snp_c2_50034	23.2981	6701476
solcap_snp_c2_50035	23.2982	6704549
solcap_snp_c1_14735	23.2983	6706118
solcap_snp_c2_56659	23.7389	7049964
PotVar0132671	23.739	7053193
PotVar0132645	23.7391	7053564
PotVar0132627	23.7392	7053812
solcap_snp_c2_56660	23.7393	7054045
PotVar0132594	23.7394	7054365
PotVar0132540	23.7395	7054856
PotVar0132534	23.7396	7055853
PotVar0132505	24.0984	7056259
solcap_snp_c2_55985	24.0985	7105363
solcap_snp_c2_55986	24.0986	7105382
solcap_snp_c2_47004	24.3207	7139104
solcap_snp_c1_13594	24.8188	7426592
solcap_snp_c2_45797	24.8189	7458015
solcap_snp_c2_45798	24.819	7480900
solcap_snp_c2_45800	24.9694	7481006
PotVar0097692	24.9695	7481428
PotVar0097752	24.9696	7482403
PotVar0097756	24.9697	7482627
PotVar0097761	24.9698	7482763
PotVar0097765	25.1582	7482806
solcap_snp_c2_45787	25.3173	7500903
solcap_snp_c2_45788	25.3174	7501313
solcap_snp_c2_45795	25.3175	7584431
solcap_snp_c1_16202	26.1824	7679711
solcap_snp_c1_8601	26.1825	7903244
solcap_snp_c2_42640	26.6827	7938249
PotVar0103477	26.6828	8357955
solcap_snp_c2_50549	27.452	8518170
solcap_snp_c2_56008	27.4521	8717409
PotVar0127526	27.4522	9111126
PotVar0127505	27.4523	9111441
PotVar0127499	27.4524	9111538
PotVar0127472	27.4525	9112096
PotVar0127459	27.4526	9112211
PotVar0127439	27.5614	9118432
PotVar0127427	27.5615	9118636
PotVar0127401	27.5616	9119503
PotVar0127400	27.5617	9119537
PotVar0127394	27.5618	9119610
PotVar0127372	27.562	9119908
solcap_snp_c1_15203	27.8019	9125136
solcap_snp_c2_52104	27.802	9125414
solcap_snp_c2_52106	27.8021	9125737
solcap_snp_c2_52110	27.8022	9126508
solcap_snp_c2_36214	27.8023	9662679
PotVar0028432	27.8024	9700790
PotVar0028392	28.1047	9705335
PotVar0028391	28.1048	9705360
PotVar0028383	28.1054	9705677
PotVar0028357	28.1055	9706112
PotVar0028350	28.1056	9706278
PotVar0028326	28.1057	9707674
solcap_snp_c1_10842	28.8462	9755448
solcap_snp_c2_36160	28.8463	9774091
solcap_snp_c2_36170	28.8464	9883246
solcap_snp_c1_10844	28.8465	9883797
solcap_snp_c2_36174	28.8466	9887244
solcap_snp_c2_36181	28.8467	9898656
solcap_snp_c2_36185	28.8468	9904080
solcap_snp_c2_36202	28.8469	9919465
solcap_snp_c2_36206	28.847	9920657
solcap_snp_c1_10855	28.8471	9998099
solcap_snp_c2_49836	29.0053	10161576
solcap_snp_c2_6603	29.3332	10650914
solcap_snp_c2_6608	29.3333	10651704
solcap_snp_c2_6609	29.4723	10651711
PotVar0028092	29.4724	10832334
PotVar0028091	29.4725	10832401
PotVar0028084	29.4726	10832504
PotVar0028083	29.4727	10832513
PotVar0028063	29.4728	10835787
PotVar0028059	29.4729	10835818
PotVar0028054	29.473	10836012
PotVar0028046	29.4731	10836282
solcap_snp_c2_6614	29.4732	10836282
PotVar0028044	29.4733	10836316
solcap_snp_c2_6616	29.4734	10836465
solcap_snp_c2_6618	29.4735	10836630
PotVar0028024	29.4736	10836978
solcap_snp_c1_2404	29.4737	10838437
solcap_snp_c1_2405	29.4738	10838506
PotVar0027937	29.4739	10838551
PotVar0027924	29.474	10838770
solcap_snp_c2_6622	29.4741	10838770
PotVar0027907	29.4742	10839097
solcap_snp_c2_6629	29.7978	10996043
solcap_snp_c2_6630	29.7979	10996101
solcap_snp_c1_2398	30.8184	11640657
solcap_snp_c2_6582	31.3511	12122133
solcap_snp_c2_6583	31.3512	12122333
solcap_snp_c2_6584	31.3513	12122489
solcap_snp_c1_1551	31.7792	13011914
solcap_snp_c2_4579	31.7793	13637711
PotVar0012599	32.0889	13669147
solcap_snp_c2_4342	32.089	14924207
solcap_snp_c1_1481	32.0891	15669100
solcap_snp_c2_11386	32.2107	17633969
PotVar0086359	32.2166	17995566
PotVar0086376	32.2167	17995810
PotVar0086496	32.2168	18005357
PotVar0086514	32.2169	18005655
solcap_snp_c1_3696	32.217	18005870
solcap_snp_c2_19701	32.2171	18507137
solcap_snp_c2_19704	32.2172	18508065
solcap_snp_c2_19707	32.2173	18508234
solcap_snp_c2_19708	32.2174	18508686
solcap_snp_c2_19716	32.2175	18514473
solcap_snp_c2_19695	32.2176	18929641
solcap_snp_c2_19696	32.2177	18929739
solcap_snp_c2_45214	32.2178	19610654
solcap_snp_c1_13998	32.2179	19993451
solcap_snp_c2_20577	32.218	21317120
solcap_snp_c2_5900	32.2181	21367162
solcap_snp_c1_2124	32.2182	22890130
solcap_snp_c2_31364	32.2183	23716492
solcap_snp_c1_9478	32.2184	23716646
solcap_snp_c2_31367	32.2185	23716935
solcap_snp_c2_31374	32.2186	23719031
solcap_snp_c2_46567	32.2187	24227179
solcap_snp_c2_26523	32.2188	24664804
solcap_snp_c2_26521	32.2189	24666831
solcap_snp_c2_8195	32.219	25726520
solcap_snp_c1_2786	32.2191	25775384
solcap_snp_c2_8193	32.2192	25813514
solcap_snp_c2_8183	32.2193	26036634
solcap_snp_c1_2780	32.2194	26038045
solcap_snp_c2_34558	32.2195	26752703
solcap_snp_c2_18241	32.2196	27223779
solcap_snp_c1_8890	32.2197	31437177
solcap_snp_c2_29268	32.2198	31601741
solcap_snp_c2_29265	32.2199	31602158
solcap_snp_c2_29261	32.22	31602507
solcap_snp_c2_29255	32.2201	31603857
solcap_snp_c1_2789	32.2202	32978026
solcap_snp_c1_2792	32.2203	32978402
solcap_snp_c1_2795	32.2204	33344388
solcap_snp_c2_7718	32.2205	34105121
solcap_snp_c1_2672	32.2206	34754163
solcap_snp_c2_2083	32.566	35464312
solcap_snp_c1_513	32.5661	35757925
solcap_snp_c2_1964	32.5662	36278447
solcap_snp_c2_1968	32.5663	36287950
solcap_snp_c2_1975	32.5664	36400942
solcap_snp_c2_1980	32.9135	36406834
solcap_snp_c2_2000	32.9136	36802629
solcap_snp_c2_2034	33.1256	37157836
solcap_snp_c1_500	33.1257	37223877
solcap_snp_c2_2061	33.3377	37396332
solcap_snp_c2_2067	33.3378	37455536
solcap_snp_c2_2069	33.3379	37460197
solcap_snp_c2_2071	33.4525	37462362
solcap_snp_c1_506	33.4532	37474267
solcap_snp_c2_2074	33.4533	37474330
solcap_snp_c2_2078	33.5663	37477685
solcap_snp_c2_57465	33.5664	37511367
solcap_snp_c2_57461	33.5665	37513704
solcap_snp_c2_13887	33.5666	37547181
solcap_snp_c2_13888	33.5667	37549983
solcap_snp_c2_57050	33.6806	37735381
solcap_snp_c2_13889	33.6807	38047700
solcap_snp_c1_4465	33.6808	38060656
solcap_snp_c2_13903	33.6809	38262937
solcap_snp_c2_13905	33.681	38264118
solcap_snp_c2_13907	33.7961	38283008
solcap_snp_c2_4522	33.8973	38625745
solcap_snp_c1_1547	33.8974	38879205
solcap_snp_c2_4540	33.8975	38879883
solcap_snp_c2_4545	33.8976	38884537
solcap_snp_c1_1548	33.8977	38918052
solcap_snp_c2_4439	33.9832	39036986
solcap_snp_c2_4445	34.0673	39086805
solcap_snp_c2_4446	34.0674	39086903
solcap_snp_c2_4452	34.0675	39087416
solcap_snp_c2_4453	34.0676	39087569
solcap_snp_c2_4455	34.0677	39158972
solcap_snp_c2_4459	34.0678	39214976
solcap_snp_c2_4465	34.0679	39215771
solcap_snp_c2_4466	34.068	39220385
solcap_snp_c2_4468	34.0681	39220713
solcap_snp_c2_4469	34.1278	39299714
solcap_snp_c2_4472	34.2373	39304257
solcap_snp_c2_4473	34.2374	39305465
PotVar0134186	34.44	39433277
PotVar0134220	34.4401	39434299
PotVar0134223	34.4402	39434358
solcap_snp_c2_4479	34.4403	39472188
solcap_snp_c2_4480	34.4404	39472209
solcap_snp_c2_9360	34.9839	40252349
solcap_snp_c2_9361	34.984	40252394
solcap_snp_c2_9362	35.113	40298750
solcap_snp_c2_9363	35.1131	40299868
solcap_snp_c2_9371	36.6342	40559638
solcap_snp_c2_9375	36.756	40611308
solcap_snp_c2_9376	36.7561	40611362
solcap_snp_c2_9380	36.7562	40612321
solcap_snp_c1_3144	36.7563	40613506
PotVar0069827	36.7564	40641681
PotVar0069750	36.7565	40642965
PotVar0069719	36.7566	40643288
solcap_snp_c2_9385	36.7567	40643288
solcap_snp_c1_3151	37.9223	40813986
solcap_snp_c2_9416	37.9224	40858606
solcap_snp_c2_9418	37.9225	40874672
solcap_snp_c2_9423	37.9226	40877268
solcap_snp_c2_9431	37.9227	40894574
solcap_snp_c1_3159	38.0854	41078607
solcap_snp_c1_3163	38.4248	41143428
solcap_snp_c2_9354	38.4249	41354488
solcap_snp_c2_9355	38.425	41354501
solcap_snp_c1_3141	38.4251	41355244
solcap_snp_c2_9357	38.4252	41356967
solcap_snp_c2_9359	38.4253	41356984
PotVar0092298	38.807	41672251
PotVar0092320	38.8071	41672783
PotVar0092409	38.8072	41675420
PotVar0092417	38.8073	41675637
solcap_snp_c1_7521	38.8074	41720015
solcap_snp_c1_7520	38.8075	41720062
solcap_snp_c2_23396	38.8246	41720719
solcap_snp_c1_7514	38.8417	41721335
solcap_snp_c2_23394	38.8587	41846151
solcap_snp_c1_7505	38.8759	41886603
solcap_snp_c2_23391	38.8939	41954061
solcap_snp_c2_23389	38.9383	41954467
solcap_snp_c2_23388	38.9384	41954541
solcap_snp_c2_23387	38.9385	41954580
PotVar0092628	38.9386	41955127
solcap_snp_c2_23383	38.9387	41955231
solcap_snp_c2_23382	39.0728	41955234
PotVar0092660	39.0729	42054240
PotVar0092712	39.073	42055398
PotVar0092714	39.0731	42055543
PotVar0092813	39.0732	42061011
solcap_snp_c2_23372	39.3383	42076263
solcap_snp_c2_23355	39.3384	42119766
solcap_snp_c2_23354	39.3385	42119915
solcap_snp_c2_23347	39.4452	42120645
solcap_snp_c1_7404	40.0954	42555347
solcap_snp_c2_23084	40.0955	42579972
PotVar0128900	40.0956	42633260
PotVar0128886	40.0957	42634279
PotVar0128797	40.0958	42635999
solcap_snp_c2_23075	40.0959	42657068
solcap_snp_c1_7381	40.3401	42659912
solcap_snp_c2_23097	40.9721	42736307
solcap_snp_c1_7407	41.1099	42784586
solcap_snp_c1_7405	41.1196	42786040
solcap_snp_c2_23091	41.1197	42818336
solcap_snp_c2_15908	42.3192	43121933
solcap_snp_c1_5112	42.3193	43125095
solcap_snp_c1_5114	42.3194	43125907
solcap_snp_c2_15917	42.4748	43171963
solcap_snp_c2_15923	42.6857	43191966
solcap_snp_c2_15925	42.8762	43192142
solcap_snp_c2_15929	42.8763	43192596
solcap_snp_c1_5126	42.8764	43253894
solcap_snp_c2_15973	42.8765	43306115
solcap_snp_c2_16004	44.2176	43579421
PotVar0093025	44.2177	43650329
solcap_snp_c1_16193	44.7282	43652914
solcap_snp_c1_16194	44.833	43653716
PotVar0092913	44.9282	43654112
PotVar0114969	45.0229	44212798
PotVar0115037	45.023	44214318
PotVar0115046	45.0231	44214575
PotVar0115101	45.0232	44215391
PotVar0115107	45.0233	44215439
PotVar0115139	45.0234	44218483
solcap_snp_c2_38643	45.4378	44288221
solcap_snp_c1_11479	45.4379	44288708
solcap_snp_c1_11475	45.438	44316647
solcap_snp_c2_38634	45.5908	44319895
solcap_snp_c1_11485	46.3978	44380117
solcap_snp_c2_38667	46.3979	44416107
solcap_snp_c2_44095	46.8019	44516464
PotVar0115202	47.0386	44643329
PotVar0115246	47.0387	44644359
PotVar0115319	47.0388	44645575
solcap_snp_c1_12978	47.0389	44649433
solcap_snp_c1_12976	47.039	44649580
solcap_snp_c2_44120	47.0391	44687759
PotVar0115415	47.0392	44692385
PotVar0115416	47.0393	44692421
solcap_snp_c1_13482	47.0394	44876137
PotVar0093513	47.4434	45034938
PotVar0093528	47.4435	45035132
PotVar0093555	47.5785	45035562
PotVar0093632	47.5786	45134287
PotVar0093634	47.5787	45134305
PotVar0093666	48.1324	45134690
PotVar0093790	48.1325	45136020
PotVar0093803	48.1326	45136272
solcap_snp_c2_33495	48.1327	45145932
solcap_snp_c2_33493	48.1328	45146117
solcap_snp_c2_33492	48.1329	45146134
solcap_snp_c2_33489	48.133	45146538
solcap_snp_c1_10012	48.1331	45146936
solcap_snp_c1_10011	48.1332	45147009
solcap_snp_c1_10001	48.8017	45239915
solcap_snp_c1_10000	48.8085	45242018
solcap_snp_c2_33429	49.7654	45498052
solcap_snp_c1_10031	50.0151	45539006
PotVar0119757	50.0152	45776828
solcap_snp_c2_45472	50.0153	45776828
PotVar0119732	50.0154	45783528
PotVar0119730	50.0155	45783540
PotVar0119726	50.1472	45783618
solcap_snp_c2_45453	50.2871	45809292
solcap_snp_c2_45448	50.2872	45813809
solcap_snp_c2_45445	50.2873	45814156
solcap_snp_c2_45436	50.2874	45842746
solcap_snp_c2_56849	50.4481	46154616
solcap_snp_c2_45188	51.586	46763232
solcap_snp_c2_45180	51.5861	46813868
solcap_snp_c2_45179	51.5862	46814225
solcap_snp_c1_13378	51.5863	46816703
solcap_snp_c2_45176	51.5864	46817527
solcap_snp_c2_45168	51.5865	46865216
solcap_snp_c2_45161	51.5866	46865716
solcap_snp_c2_45157	51.7372	46897234
solcap_snp_c2_45155	51.7373	46903202
solcap_snp_c2_45196	52.0538	46948308
solcap_snp_c2_25205	52.6742	47102897
solcap_snp_c2_25207	52.6743	47103026
PotVar0133616	52.6744	47103596
PotVar0133600	52.6745	47104031
PotVar0133580	52.6746	47104414
solcap_snp_c1_7992	52.6747	47159232
solcap_snp_c1_7993	52.6748	47159265
solcap_snp_c2_25287	52.6749	47160012
PotVar0104407	52.9648	47277640
solcap_snp_c2_25211	52.9649	47307287
solcap_snp_c2_25212	53.6086	47307302
solcap_snp_c2_25216	53.6087	47311025
solcap_snp_c2_25219	53.6088	47348171
solcap_snp_c1_7973	53.6089	47443993
solcap_snp_c2_25233	53.609	47483009
solcap_snp_c1_7980	53.6091	47551623
solcap_snp_c2_25250	53.6092	47642053
solcap_snp_c2_25253	53.6093	47655459
solcap_snp_c2_25254	53.6094	47655500
solcap_snp_c2_25261	53.6095	47674858
solcap_snp_c2_25265	53.6096	47693809
solcap_snp_c2_38764	53.6863	47811510
solcap_snp_c2_38787	53.6864	47875892
solcap_snp_c2_46342	54.7037	48199439
solcap_snp_c2_46329	55.6209	48224240
solcap_snp_c2_19898	55.9044	48585482
solcap_snp_c2_19897	55.9045	48586470
solcap_snp_c1_6244	55.9046	48637648
solcap_snp_c1_6240	55.9047	48778791
PotVar0088465	56.7081	48794483
PotVar0088456	56.7082	48794627
PotVar0088454	56.7083	48794642
PotVar0088450	57.1119	48794708
PotVar0088436	57.112	48794888
solcap_snp_c2_19826	57.2773	48955227
solcap_snp_c2_19804	57.2774	48956963
solcap_snp_c2_19803	57.2775	48965517
solcap_snp_c2_19787	57.2776	49002470
solcap_snp_c2_19759	57.5984	49175223
solcap_snp_c2_19749	57.5985	49215260
solcap_snp_c2_19748	58.052	49215404
solcap_snp_c2_19746	58.0521	49221746
solcap_snp_c2_19899	58.4297	49331831
solcap_snp_c2_19854	58.4298	49351625
solcap_snp_c1_6238	58.4299	49362126
PotVar0134027	58.5887	49455578
PotVar0134030	58.7416	49455646
PotVar0134031	58.7417	49455740
solcap_snp_c1_10467	58.7778	49455985
PotVar0134065	58.8216	49456113
PotVar0134105	58.8217	49456919
PotVar0134122	58.8218	49457142
solcap_snp_c2_35100	58.8219	49465165
PotVar0134969	58.822	49531902
PotVar0134970	58.8243	49531910
PotVar0134998	58.9625	49532206
solcap_snp_c2_35105	58.9626	49553646
solcap_snp_c2_35110	58.9627	49559343
solcap_snp_c1_10457	58.9628	49665986
solcap_snp_c1_10461	59.2443	49668095
solcap_snp_c2_35008	59.2444	49701746
solcap_snp_c2_35049	59.4971	49745280
solcap_snp_c2_35050	59.4972	49745863
solcap_snp_c2_35052	59.4973	49746777
solcap_snp_c2_35053	59.4974	49746796
solcap_snp_c2_35054	59.4975	49747233
solcap_snp_c2_35056	59.4976	49747344
solcap_snp_c2_35058	59.4977	49747632
solcap_snp_c2_35059	59.4978	49747693
solcap_snp_c2_35061	59.4979	49747896
solcap_snp_c2_35062	59.498	49748343
solcap_snp_c2_35075	59.7086	49796032
solcap_snp_c2_35078	59.7087	49839630
solcap_snp_c2_35094	59.7088	49918098
solcap_snp_c2_26119	59.8304	50055286
solcap_snp_c2_26002	60.5495	50148627
solcap_snp_c2_26003	60.5496	50150805
solcap_snp_c2_26004	60.5497	50150911
solcap_snp_c2_26005	60.5498	50151362
solcap_snp_c2_26007	60.5499	50151500
solcap_snp_c2_26009	60.55	50151931
solcap_snp_c2_26011	60.5501	50151997
solcap_snp_c2_26012	60.5502	50152831
solcap_snp_c2_26013	60.5503	50152841
solcap_snp_c2_26040	61.6607	50287421
solcap_snp_c2_26041	61.6608	50290359
PotVar0047459	61.6609	50331383
PotVar0047551	61.661	50332447
PotVar0047595	61.6611	50333219
PotVar0047616	61.6612	50333469
PotVar0047676	61.6613	50335450
PotVar0047699	61.6958	50414654
PotVar0047712	61.813	50414972
PotVar0047713	61.8131	50415029
solcap_snp_c1_8150	61.8132	50416079
solcap_snp_c2_33019	66.7557	50921700
PotVar0047739	66.7558	50950385
PotVar0047767	66.7559	50950773
PotVar0047769	66.756	50950847
PotVar0047816	66.7561	50952546
PotVar0047822	66.7562	50952719
PotVar0047883	66.7563	50953843
PotVar0047982	67.4087	50960938
solcap_snp_c1_9878	67.4088	50960978
PotVar0047993	67.4089	50961120
solcap_snp_c1_9898	68.2205	51079622
solcap_snp_c2_33038	69.063	51080646
solcap_snp_c1_9900	69.0631	51080778
solcap_snp_c1_9901	70.3129	51080838
solcap_snp_c1_9918	71.8394	51229923
PotVar0048012	72.5645	51377495
PotVar0048065	72.8053	51378119
solcap_snp_c2_28309	73.3321	51451635
solcap_snp_c1_8708	73.3322	51452865
solcap_snp_c1_8709	73.3323	51453513
solcap_snp_c2_28310	73.3324	51453747
solcap_snp_c1_8686	73.3325	51496616
solcap_snp_c2_28171	73.3326	51518499
solcap_snp_c2_28174	73.3327	51518820
solcap_snp_c2_28176	73.3328	51519014
solcap_snp_c2_28195	73.3329	51551349
solcap_snp_c2_28212	73.333	51566031
solcap_snp_c2_28214	74.8355	51566353
solcap_snp_c2_28217	74.8356	51599774
solcap_snp_c2_28223	75.079	51604961
solcap_snp_c2_28224	75.0791	51604972
solcap_snp_c2_28227	75.0792	51606103
solcap_snp_c2_28228	75.0793	51606802
solcap_snp_c1_8701	75.0794	51755737
solcap_snp_c2_28238	75.0795	51779684
solcap_snp_c2_28244	75.0796	51780403
solcap_snp_c2_28252	76.8741	51819512
solcap_snp_c2_28290	78.7643	52001357
PotVar0044701	78.7644	52119316
PotVar0044691	78.7645	52119436
PotVar0044685	78.7646	52119592
PotVar0044681	78.7647	52119649
PotVar0044676	78.7648	52119823
PotVar0044653	78.7649	52120033
PotVar0044651	78.765	52120135
PotVar0044649	78.7651	52120167
PotVar0044634	78.7652	52120331
solcap_snp_c2_42763	80.1333	52191007
solcap_snp_c2_42762	80.1334	52191131
solcap_snp_c2_42761	80.1335	52191182
solcap_snp_c2_42760	80.2735	52191287
solcap_snp_c2_42759	80.4303	52191317
solcap_snp_c2_42758	80.4304	52191517
solcap_snp_c2_42757	80.4305	52191559
solcap_snp_c2_42756	80.4306	52191846
PotVar0044597	84.1525	52231528
PotVar0044572	84.1526	52231945
PotVar0044566	84.1527	52313081
PotVar0044551	84.4038	52313414
PotVar0044530	84.4039	52316106
PotVar0044529	84.4301	52316187
PotVar0044416	84.4302	52317483
PotVar0044411	84.4303	52317574
PotVar0044409	84.4304	52317630
PotVar0044350	85.24	52334665
PotVar0044287	85.2401	52337121
PotVar0044278	85.2402	52337275
PotVar0044252	86.5685	52337536
PotVar0044179	86.5686	52338266
PotVar0044169	86.5687	52338352
PotVar0044156	86.5688	52338593
solcap_snp_c2_12420	86.9802	52454604
PotVar0044133	86.9803	52466904
PotVar0044131	86.9804	52466933
PotVar0044121	86.9805	52467113
PotVar0044090	86.9806	52467506
PotVar0044086	86.9807	52467675
solcap_snp_c2_12404	86.9808	52544646
solcap_snp_c2_12405	86.9809	52544739
solcap_snp_c2_12411	86.981	52546482
solcap_snp_c1_4021	86.9811	52575033
PotVar0044047	88.1853	52674315
PotVar0043958	88.1854	52675469
PotVar0043954	88.1855	52675600
PotVar0043929	88.1856	52675953
PotVar0043927	88.6064	52676012
solcap_snp_c1_4029	88.6065	52693868
solcap_snp_c1_16636	88.762	52759623
solcap_snp_c2_12522	88.7621	52789478
solcap_snp_c2_12526	88.7622	52792672
solcap_snp_c2_12527	88.876	52792715
solcap_snp_c2_12528	88.8761	52792784
solcap_snp_c1_4044	88.8762	52793523
solcap_snp_c2_12530	88.8763	52794272
solcap_snp_c2_12531	89.0639	52795452
solcap_snp_c2_12549	89.325	52913969
solcap_snp_c2_12553	89.3251	52914613
solcap_snp_c2_12567	90.01	52995514
solcap_snp_c2_12573	90.0101	53029308
solcap_snp_c2_12575	90.5379	53030075
solcap_snp_c2_12578	90.8524	53077509
solcap_snp_c2_12595	90.955	53104292
solcap_snp_c2_12596	90.9551	53104327
solcap_snp_c2_12597	90.9552	53105770
solcap_snp_c2_12598	90.9553	53105785
solcap_snp_c2_12599	90.9554	53105872
solcap_snp_c2_12600	91.3878	53105994
solcap_snp_c2_12602	91.3879	53106009
solcap_snp_c2_12603	91.388	53106014
solcap_snp_c2_12618	91.7074	53161093
solcap_snp_c1_4054	91.7075	53161885
solcap_snp_c2_12622	92.8259	53178949
PotVar0043866	92.826	53251915
PotVar0043860	93.1783	53252014
PotVar0043855	93.1784	53252078
solcap_snp_c2_12696	93.1785	53296175
solcap_snp_c2_12720	93.9309	53367235
solcap_snp_c2_51532	94.4281	53595946
solcap_snp_c2_51513	94.8166	53623295
solcap_snp_c2_51536	95.0552	53654818
solcap_snp_c2_51534	95.0553	53655649
solcap_snp_c2_51533	95.0554	53656225
PotVar0102946	95.0555	53691444
PotVar0102815	95.0556	53696211
PotVar0102788	95.0557	53696685
PotVar0102784	95.0558	53696744
PotVar0102764	95.2734	53750207
PotVar0102741	95.2735	53750606
PotVar0102724	95.7846	53750808
solcap_snp_c2_16848	96.1392	53782889
solcap_snp_c2_16847	96.1393	53782904
solcap_snp_c2_16846	97.1947	53783075
solcap_snp_c2_16843	97.3139	53822702
solcap_snp_c2_16831	97.9285	53888482
solcap_snp_c2_16824	98.8309	54045144
solcap_snp_c2_30475	98.831	54121077
solcap_snp_c1_9206	99.292	54219438
solcap_snp_c2_30416	100.902	54274624
PotVar0102702	101.275	54321266
solcap_snp_c1_9217	101.275	54322309
PotVar0102572	101.275	54322597
solcap_snp_c2_30427	101.275	54329782
solcap_snp_c2_30428	101.275	54329836
solcap_snp_c2_30460	101.275	54505312
PotVar0128548	101.275	54548344
PotVar0128554	101.275	54548518
solcap_snp_c2_30471	101.275	54548557
PotVar0128561	101.431	54548687
PotVar0128672	101.587	54549979
PotVar0128673	101.745	54550051
solcap_snp_c2_18544	101.952	54839197
solcap_snp_c2_18545	101.952	54856073
solcap_snp_c2_18546	101.952	54856283
solcap_snp_c2_18549	101.952	54860473
solcap_snp_c1_5970	101.953	54862076
solcap_snp_c2_18570	102.98	54961836
solcap_snp_c2_18573	102.98	54997992
PotVar0037204	104.512	55079806
solcap_snp_c1_5981	104.512	55130142
solcap_snp_c2_18657	104.513	55207622
solcap_snp_c2_18661	104.513	55213127
solcap_snp_c2_18664	104.513	55219804
solcap_snp_c2_18666	104.513	55220062
solcap_snp_c2_18667	104.513	55220152
solcap_snp_c2_18680	104.513	55283766
solcap_snp_c2_18683	104.597	55284153
solcap_snp_c2_18684	104.744	55284214
solcap_snp_c2_18685	105.222	55284235
PotVar0037143	105.788	55382620
PotVar0037131	105.788	55383055
PotVar0037125	105.788	55383151
PotVar0037122	105.788	55383240
solcap_snp_c2_18745	105.789	55465761
PotVar0037040	106.034	55469054
PotVar0037035	106.034	55469145
solcap_snp_c2_18759	106.035	55491189
solcap_snp_c2_28845	107.731	55657721
PotVar0037013	107.731	55736406
PotVar0037004	107.732	55736646
PotVar0036997	107.732	55736725
PotVar0036990	107.732	55736778
solcap_snp_c1_8821	107.732	55855903
solcap_snp_c2_28840	107.732	55856061
solcap_snp_c2_28846	107.877	55887265
solcap_snp_c2_28848	107.877	55889095
solcap_snp_c2_28849	107.877	55889177
solcap_snp_c2_28850	107.88	55889262
solcap_snp_c2_28851	107.882	55889622
PotVar0036819	108.171	56005446
PotVar0036750	108.171	56006549
PotVar0036701	108.171	56007493
solcap_snp_c2_28903	108.778	56037330
PotVar0036643	108.778	56068215
solcap_snp_c2_33243	109.314	56508808
solcap_snp_c2_33280	109.314	56628128
solcap_snp_c2_33278	109.314	56629628
solcap_snp_c2_33277	109.314	56630012

## Sheet: chr8
Supplementary Table 3. Molecular markers linkage map of chromosome 8.
Marker	Position (cM)	Genetic Position(cM)
solcap_snp_c1_9779	0	1067135
PotVar0113635	0.0001	1076505
solcap_snp_c1_9785	0.592689	1179922
solcap_snp_c2_32667	0.592789	1218944
solcap_snp_c2_32702	1.46233	1367551
solcap_snp_c2_32710	1.46243	1396675
solcap_snp_c2_51957	1.46253	1767949
solcap_snp_c2_51970	1.46263	1839772
solcap_snp_c2_51954	1.46273	1868572
solcap_snp_c1_8522	2.42998	1952169
solcap_snp_c2_27452	3.50986	2045972
solcap_snp_c1_8508	3.98073	2163605
solcap_snp_c2_27485	3.98083	2202542
solcap_snp_c1_8516	3.98093	2365709
PotVar0088806	3.98103	2379079
PotVar0088803	3.98113	2379247
solcap_snp_c1_8518	3.98123	2473819
solcap_snp_c1_8520	4.88439	2522910
solcap_snp_c2_53516	6.36535	2593796
PotVar0088783	6.36545	2609389
PotVar0088766	6.36555	2687640
PotVar0088760	6.54724	2689038
PotVar0088757	6.58637	2689114
PotVar0088739	6.58647	2692415
PotVar0088738	6.58657	2692438
PotVar0088714	6.58667	2692924
PotVar0088710	6.58677	2693004
solcap_snp_c1_14884	7.68568	2693584
PotVar0088684	7.68578	2693721
PotVar0110149	7.68588	3132641
solcap_snp_c2_24403	8.23279	3211341
solcap_snp_c2_24404	8.23289	3212748
PotVar0110109	8.23299	3212750
PotVar0110096	8.23309	3213037
PotVar0110083	8.23319	3213389
PotVar0110073	8.23329	3213596
PotVar0110067	8.23339	3213774
PotVar0110066	8.23349	3213832
solcap_snp_c2_50041	8.60652	3502674
solcap_snp_c2_44855	9.41594	3650168
PotVar0108806	9.63584	3724298
PotVar0108807	9.63594	3724344
PotVar0108810	9.63604	3724380
PotVar0108812	9.63614	3724464
PotVar0108825	9.63624	3724586
solcap_snp_c2_57750	9.63634	3728282
solcap_snp_c2_57767	9.63644	3735546
PotVar0108896	10.966	3856767
PotVar0108902	10.9661	3857075
PotVar0108913	10.9662	3857213
PotVar0108989	10.9663	3858399
PotVar0108990	10.9664	3858453
PotVar0108998	10.9665	3860559
solcap_snp_c2_34124	11.3818	3914208
solcap_snp_c2_34121	11.7947	3962323
solcap_snp_c2_34117	11.7948	3993593
solcap_snp_c2_34115	11.7949	3993755
solcap_snp_c2_34110	11.8626	4026312
solcap_snp_c2_34109	11.8627	4026338
solcap_snp_c2_34179	12.7765	4174544
solcap_snp_c2_34103	12.7766	4235737
solcap_snp_c2_19533	13.0589	4336546
solcap_snp_c2_19534	13.059	4354484
solcap_snp_c2_52253	13.4838	4441556
solcap_snp_c1_15260	13.4839	4456432
solcap_snp_c2_30104	14.5071	4742020
PotVar0063939	14.9256	4841881
PotVar0063938	14.9257	4841986
solcap_snp_c2_30037	14.9258	4843008
solcap_snp_c2_30044	14.9259	4860759
solcap_snp_c2_30053	15.2806	4911152
solcap_snp_c2_30054	15.2807	4918755
solcap_snp_c2_30055	15.2808	4970459
solcap_snp_c2_30067	15.6361	5062018
PotVar0063904	15.6362	5062099
PotVar0063885	15.6363	5062688
PotVar0063845	15.6364	5063237
PotVar0063844	15.6365	5063298
PotVar0063780	15.6366	5064099
solcap_snp_c2_30073	15.8802	5069311
solcap_snp_c1_9105	15.8803	5144271
solcap_snp_c2_48951	16.5999	5311941
solcap_snp_c2_48953	16.7788	5312058
PotVar0063767	16.7789	5382879
PotVar0063766	16.779	5382882
PotVar0063758	16.7791	5383089
PotVar0063756	16.7792	5383125
PotVar0063755	16.7793	5383161
PotVar0063725	16.7794	5383657
PotVar0063713	17.3426	5438790
PotVar0063704	17.3427	5438901
PotVar0063703	17.3428	5438997
PotVar0063693	17.3429	5439172
PotVar0063624	17.343	5439801
solcap_snp_c2_26919	17.442	5449109
PotVar0063591	17.8426	5599267
PotVar0063585	17.8427	5599365
PotVar0063578	17.8428	5599442
solcap_snp_c1_8380	18.1441	5810262
solcap_snp_c2_26935	18.1442	5818629
solcap_snp_c2_26936	18.1443	5818668
solcap_snp_c1_13229	18.4612	6541246
solcap_snp_c1_13230	18.7748	6659364
solcap_snp_c2_12746	19.0747	7267927
solcap_snp_c2_12747	19.0748	7267970
solcap_snp_c2_12748	19.0749	7277409
solcap_snp_c2_12749	19.075	7277824
solcap_snp_c2_12751	19.0751	7280816
solcap_snp_c1_15451	19.0752	7440493
solcap_snp_c2_47908	19.5703	7754846
solcap_snp_c2_47906	19.5704	7788444
solcap_snp_c2_47904	19.5705	7795381
solcap_snp_c1_14166	19.5706	7836331
solcap_snp_c1_14165	19.5707	7837521
solcap_snp_c2_47903	19.5708	7837821
solcap_snp_c2_47901	19.5709	7838596
solcap_snp_c2_47900	19.571	7838662
solcap_snp_c2_47896	19.5711	7843374
solcap_snp_c1_14173	19.5712	7847311
solcap_snp_c2_47917	19.7451	7860923
solcap_snp_c2_19646	20.1668	8092928
solcap_snp_c2_19645	20.3178	8134055
solcap_snp_c2_19639	20.3179	8195963
solcap_snp_c2_19638	20.4989	8196002
solcap_snp_c2_19631	20.499	8354399
solcap_snp_c2_19630	20.4991	8450151
solcap_snp_c2_17283	20.4992	8980876
solcap_snp_c2_17284	20.4993	8980940
solcap_snp_c1_5707	20.4994	9087306
solcap_snp_c2_17289	20.4995	9087656
solcap_snp_c2_17290	20.4996	9088040
solcap_snp_c2_17294	20.4997	9091210
solcap_snp_c2_17297	20.4998	9104487
solcap_snp_c2_17301	20.4999	9225869
solcap_snp_c1_5713	20.5	9226857
solcap_snp_c2_17305	20.5001	9320406
solcap_snp_c2_17311	20.5002	9321174
solcap_snp_c2_17318	20.6659	9554691
solcap_snp_c2_17321	20.666	9558581
solcap_snp_c2_57003	20.6661	9975029
solcap_snp_c2_57002	20.6662	9975056
solcap_snp_c2_48358	20.6663	10277914
solcap_snp_c2_33772	20.8706	10832976
solcap_snp_c2_33771	21.0301	10833062
solcap_snp_c1_9474	21.0302	11597854
solcap_snp_c2_30905	21.3493	12698757
solcap_snp_c2_30907	21.3494	12699036
solcap_snp_c2_7782	21.3495	13195806
solcap_snp_c1_2684	21.3496	13208418
solcap_snp_c1_2686	21.3497	13212735
solcap_snp_c1_2687	21.3498	13213033
solcap_snp_c2_7785	21.3499	13213183
solcap_snp_c2_28519	21.35	13627692
PotVar0088658	21.6804	15138225
solcap_snp_c2_50849	21.6805	15139435
solcap_snp_c2_34096	22.4299	15875370
solcap_snp_c2_34090	22.43	15880448
solcap_snp_c2_53878	22.4301	15892521
solcap_snp_c2_53881	22.4302	15911353
solcap_snp_c1_15689	22.4303	15912416
solcap_snp_c2_34087	22.4304	15953401
solcap_snp_c2_34085	22.4305	15953548
solcap_snp_c2_34078	22.4306	16000177
solcap_snp_c2_34072	22.4307	16001219
solcap_snp_c2_34069	22.4308	16001908
solcap_snp_c2_34565	22.4309	16250630
solcap_snp_c2_34564	23.1356	16652660
solcap_snp_c2_42298	23.1357	17060414
solcap_snp_c2_42293	23.1358	17061437
solcap_snp_c2_42290	23.1359	17061842
solcap_snp_c2_2122	23.136	17233898
solcap_snp_c2_2103	23.1361	18093363
solcap_snp_c2_2102	23.152	18093410
solcap_snp_c2_2178	23.1672	18395020
solcap_snp_c2_2183	23.1826	19348560
solcap_snp_c2_19951	23.1982	19827795
solcap_snp_c2_19949	23.214	19827882
solcap_snp_c2_19942	23.2299	19950036
PotVar0076443	23.2462	19950564
PotVar0076451	23.2463	19950697
solcap_snp_c2_19939	23.2464	19951160
PotVar0076488	23.2465	19951306
solcap_snp_c2_2852	23.2466	20914451
solcap_snp_c2_2844	23.2467	21132773
solcap_snp_c2_2842	23.2468	21132878
solcap_snp_c2_2840	23.2469	21133008
solcap_snp_c2_2837	23.247	21434617
solcap_snp_c1_846	23.2471	21435247
solcap_snp_c2_2832	23.2472	21444550
solcap_snp_c2_2826	23.2473	21591331
solcap_snp_c2_8169	23.2474	21989034
solcap_snp_c2_5915	23.2475	23895193
solcap_snp_c2_5914	23.2476	23895246
solcap_snp_c2_20299	23.2477	25469126
solcap_snp_c2_29489	23.2478	26137205
solcap_snp_c2_29490	23.2479	26139555
solcap_snp_c2_29495	23.248	26158884
solcap_snp_c2_29498	23.2481	26162678
solcap_snp_c2_29477	23.2482	26163253
solcap_snp_c2_29478	23.2483	26163279
solcap_snp_c2_29479	23.2484	26170060
solcap_snp_c2_29283	23.2485	28480198
solcap_snp_c2_19426	23.2486	29755831
solcap_snp_c2_19427	23.2487	29757226
solcap_snp_c2_19431	23.2488	29758299
solcap_snp_c2_19432	23.2489	29758723
solcap_snp_c1_6138	23.249	29813852
solcap_snp_c2_19437	23.2491	30148056
solcap_snp_c2_19439	23.2492	30148252
solcap_snp_c2_19442	23.2493	30149471
solcap_snp_c2_47920	23.2494	30367162
solcap_snp_c2_51063	24.0535	31975954
solcap_snp_c2_30255	24.0536	32229292
solcap_snp_c1_9169	24.2201	32311520
solcap_snp_c1_9170	24.2202	32311544
solcap_snp_c1_9174	24.2203	32472512
solcap_snp_c2_30288	24.2204	32544771
solcap_snp_c2_30293	24.5451	32685897
solcap_snp_c1_11442	24.5452	32956500
solcap_snp_c2_33766	24.5453	33597174
PotVar0060621	25.0433	34288143
PotVar0060602	25.0434	34288503
solcap_snp_c2_50362	25.4926	34342007
solcap_snp_c2_32809	25.8482	34576702
solcap_snp_c2_32802	26.0483	34865887
solcap_snp_c2_57660	26.0484	34986682
solcap_snp_c1_11719	26.5899	35379060
solcap_snp_c1_14542	27.435	35553321
solcap_snp_c2_49249	27.4351	35650971
solcap_snp_c2_49246	27.4352	35651364
solcap_snp_c2_49245	27.4353	35651378
solcap_snp_c2_49243	27.4354	35651619
solcap_snp_c2_56491	27.4355	35731349
solcap_snp_c2_41470	27.4356	35921197
solcap_snp_c2_41467	27.4357	35921407
solcap_snp_c2_41463	27.4358	35922019
solcap_snp_c2_41446	27.4359	36020869
solcap_snp_c2_41493	27.436	36036647
solcap_snp_c1_12163	28.0063	36109318
solcap_snp_c1_12162	28.0064	36109390
solcap_snp_c1_12161	28.0065	36109444
solcap_snp_c2_56757	28.0066	36470062
solcap_snp_c2_2817	28.0067	36713875
solcap_snp_c2_2816	28.1255	36714006
solcap_snp_c2_55227	29.175	36921507
solcap_snp_c1_838	29.3695	37259543
solcap_snp_c1_836	29.3696	37379264
solcap_snp_c2_2769	29.4937	37424391
solcap_snp_c2_2757	29.7968	37467447
solcap_snp_c2_2754	29.7969	37468754
solcap_snp_c2_2753	29.797	37468773
solcap_snp_c2_2748	29.7971	37492252
solcap_snp_c1_821	29.7972	37494529
solcap_snp_c2_2745	29.7973	37507745
solcap_snp_c2_2744	29.7974	37507769
solcap_snp_c2_2729	30.1095	37673474
solcap_snp_c1_812	30.1096	37691524
solcap_snp_c2_2780	30.475	37835878
solcap_snp_c2_32280	30.7042	38286683
solcap_snp_c2_32291	30.7043	38462465
solcap_snp_c2_32300	30.7044	38685106
solcap_snp_c2_32309	30.7045	38687037
solcap_snp_c2_32310	30.7046	38687057
solcap_snp_c2_32317	30.8615	38782386
solcap_snp_c2_51320	31.239	38843024
solcap_snp_c2_51328	31.2391	38876238
solcap_snp_c2_51329	31.2392	38877340
solcap_snp_c2_51312	32.3108	38946178
solcap_snp_c2_45770	32.3109	39115651
solcap_snp_c1_13584	33.226	39257128
solcap_snp_c2_45750	33.2261	39257196
solcap_snp_c2_45751	33.2262	39257244
solcap_snp_c1_13586	33.2263	39263197
solcap_snp_c2_45763	33.2264	39270698
solcap_snp_c2_45764	33.2265	39270757
solcap_snp_c2_44331	33.655	39563855
solcap_snp_c2_44319	33.6565	39579286
solcap_snp_c2_44307	33.6566	39591317
solcap_snp_c2_44305	33.6567	39591467
solcap_snp_c2_44303	33.7872	39591575
solcap_snp_c1_13043	33.7873	39670914
PotVar0133433	33.7874	39671480
solcap_snp_c2_44335	34.0621	39693615
solcap_snp_c2_44334	34.0622	39698106
solcap_snp_c1_15045	34.0623	39908319
solcap_snp_c2_51371	34.0624	39908656
solcap_snp_c1_15044	34.0625	39918144
solcap_snp_c1_15043	34.0626	39918207
solcap_snp_c2_51372	34.4602	39999345
solcap_snp_c2_51376	34.6534	40021417
solcap_snp_c2_51375	34.6535	40021460
solcap_snp_c1_14108	35.1814	40062658
solcap_snp_c2_47468	35.1815	40097312
solcap_snp_c2_47459	35.1816	40139102
solcap_snp_c2_47444	35.3684	40143565
PotVar0107820	35.5711	40678974
solcap_snp_c2_33405	35.5712	40709666
solcap_snp_c2_33403	35.9762	40744879
solcap_snp_c2_33400	35.9763	40745940
solcap_snp_c2_33386	35.9764	40791117
solcap_snp_c2_33381	36.4407	40837569
solcap_snp_c2_33422	36.4408	40944732
PotVar0134733	37.0904	41087499
PotVar0134734	37.0905	41087520
solcap_snp_c2_48182	37.0906	41087520
PotVar0134741	37.0907	41087626
solcap_snp_c2_48184	37.0908	41087752
PotVar0134751	37.0909	41087771
PotVar0134757	37.091	41087909
PotVar0134764	37.0911	41088132
solcap_snp_c1_14271	37.0912	41088132
PotVar0134765	37.3298	41088189
PotVar0134793	37.3299	41088541
PotVar0134854	37.3301	41091605
solcap_snp_c1_11562	38.4884	42305503
solcap_snp_c1_11559	39.0644	42427082
solcap_snp_c2_18872	39.0645	42460813
PotVar0086588	40.2965	43092355
PotVar0086596	40.2966	43092439
PotVar0086598	40.2967	43092488
PotVar0086640	40.2968	43093160
PotVar0086641	40.2969	43093190
PotVar0086646	40.3081	43093284
PotVar0086703	40.3098	43095613
PotVar0086745	40.3393	43096061
PotVar0086773	40.3793	43096487
solcap_snp_c2_18892	40.403	43102081
solcap_snp_c2_18894	40.4031	43102244
solcap_snp_c2_18895	40.4032	43106686
PotVar0086805	40.4033	43123472
PotVar0086812	40.6193	43123559
PotVar0086813	40.6194	43123586
PotVar0086820	40.6195	43123854
PotVar0086822	40.6196	43123862
PotVar0086834	40.6197	43124110
PotVar0086907	40.6198	43124680
solcap_snp_c2_18918	41.3173	43308600
solcap_snp_c2_18922	41.3174	43333712
solcap_snp_c2_18926	41.8807	43346350
solcap_snp_c2_18943	41.8808	43369128
solcap_snp_c2_18945	41.8809	43375794
solcap_snp_c2_18964	41.881	43435799
solcap_snp_c2_53733	42.0363	43760647
solcap_snp_c2_53737	42.0364	43763298
solcap_snp_c2_57300	42.0365	43848943
PotVar0123525	42.1827	43890309
PotVar0123481	42.1828	43892127
PotVar0123452	42.8995	43893176
PotVar0123406	42.8996	43895510
PotVar0123404	42.8997	43895578
PotVar0123288	42.8998	43897045
solcap_snp_c2_41044	42.8999	44234462
solcap_snp_c2_15874	45.0039	44805688
PotVar0076957	45.5482	44997223
PotVar0077006	45.5483	44998297
PotVar0077009	45.5484	44998356
PotVar0077015	45.5485	44998508
PotVar0077030	45.5486	44998803
PotVar0077094	45.5487	45007793
PotVar0077157	45.5488	45008555
PotVar0077179	46.1362	45008776
PotVar0077181	46.1363	45008796
PotVar0077225	46.1364	45009990
solcap_snp_c2_15847	46.3211	45123488
solcap_snp_c2_15840	46.3212	45128134
solcap_snp_c2_15834	46.3213	45161929
solcap_snp_c2_15818	46.3214	45237758
solcap_snp_c1_5094	46.3215	45264835
PotVar0077284	46.3216	45284154
PotVar0077378	46.5472	45286447
solcap_snp_c2_15803	46.5473	45293744
solcap_snp_c2_15796	46.6762	45364462
solcap_snp_c2_44289	46.7224	45432123
solcap_snp_c2_44274	46.7903	45452423
solcap_snp_c2_44273	46.7904	45457189
solcap_snp_c2_44299	46.7905	45631066
PotVar0077500	46.7906	45631147
solcap_snp_c2_44298	47.0095	45631215
solcap_snp_c2_50704	47.0096	45857097
solcap_snp_c2_50702	47.0097	45866010
PotVar0125199	47.0098	45868306
PotVar0125284	47.0099	45868995
PotVar0125352	47.01	45869730
PotVar0125390	47.0101	45870484
solcap_snp_c1_14766	47.6494	45988446
solcap_snp_c1_14763	47.6495	45990790
solcap_snp_c2_50150	47.8503	46018693
solcap_snp_c2_51053	48.5217	46358239
solcap_snp_c2_51052	48.5218	46359102
solcap_snp_c2_51051	48.8106	46390120
solcap_snp_c1_15416	48.8107	46805752
solcap_snp_c2_51749	49.5883	46877535
solcap_snp_c2_40295	49.5884	47095975
solcap_snp_c2_40294	49.8748	47096072
PotVar0103018	49.8749	47166546
PotVar0103074	49.875	47168292
PotVar0103095	49.8751	47169759
PotVar0103097	49.8752	47169845
PotVar0103109	49.8753	47170072
PotVar0103166	49.8754	47171906
PotVar0103197	49.8755	47173371
solcap_snp_c2_40290	49.8756	47174104
solcap_snp_c2_40320	50.1513	47319799
PotVar0103305	50.4302	47376274
PotVar0103331	50.6948	47376966
PotVar0103335	50.6949	47377137
PotVar0103342	50.695	47377206
PotVar0103352	50.6951	47377323
solcap_snp_c1_15692	50.6952	47472669
solcap_snp_c2_53902	50.6953	47498974
solcap_snp_c2_53903	51.0132	47499196
solcap_snp_c2_53914	51.6515	47519565
solcap_snp_c2_28580	51.8059	48017099
PotVar0121939	51.806	48017630
PotVar0121994	52.0292	48019627
PotVar0122021	52.0293	48019818
PotVar0122026	52.0294	48019901
solcap_snp_c2_28641	52.0295	48048626
solcap_snp_c2_28521	52.3347	48085342
solcap_snp_c2_28522	52.3348	48085423
solcap_snp_c2_28535	52.6886	48171790
solcap_snp_c2_28538	52.6887	48172953
solcap_snp_c2_28548	52.6888	48214471
solcap_snp_c2_28550	52.6889	48236149
solcap_snp_c2_28555	53.0705	48308474
solcap_snp_c2_28561	53.0706	48310519
solcap_snp_c2_28562	53.0707	48310597
solcap_snp_c2_28563	53.2584	48327529
solcap_snp_c2_28568	53.2585	48333994
solcap_snp_c2_28572	53.6761	48345692
solcap_snp_c2_28579	53.6762	48348145
solcap_snp_c1_8774	53.6763	48369047
solcap_snp_c2_28609	54.036	48610236
solcap_snp_c1_8778	54.1439	48619474
solcap_snp_c2_28615	54.144	48621678
solcap_snp_c2_28632	54.1441	48669101
solcap_snp_c2_28633	54.6097	48669299
solcap_snp_c2_28634	54.6098	48669473
solcap_snp_c2_28635	54.746	48669487
solcap_snp_c2_28636	54.7461	48669653
solcap_snp_c2_28637	54.7462	48669662
solcap_snp_c2_49349	54.7463	48739279
solcap_snp_c2_49342	54.909	48742132
solcap_snp_c2_49337	54.9091	48764468
solcap_snp_c2_49381	54.9092	48791632
solcap_snp_c2_49379	54.9093	48801168
solcap_snp_c2_49377	54.9094	48805250
solcap_snp_c2_49375	54.9095	48805364
solcap_snp_c2_49365	55.0618	48851146
solcap_snp_c2_49361	55.2139	48862873
solcap_snp_c2_49354	55.214	48863517
solcap_snp_c2_7353	55.2141	48895181
solcap_snp_c1_2614	55.7003	48914594
PotVar0063529	55.8627	48935556
PotVar0063469	56.7431	48936390
PotVar0063446	56.7432	48936587
PotVar0063427	56.7433	48937514
PotVar0063421	56.7434	48937685
solcap_snp_c2_44529	56.7435	49035387
solcap_snp_c1_13099	56.7436	49061844
solcap_snp_c1_13116	56.7437	49071663
solcap_snp_c2_44545	56.7642	49079957
solcap_snp_c2_44553	56.7643	49089093
solcap_snp_c2_44474	56.7644	49091052
PotVar0063333	56.7645	49172679
PotVar0063328	57.1088	49172899
PotVar0063283	57.1089	49173530
PotVar0063187	57.109	49175303
PotVar0063169	57.1091	49175812
solcap_snp_c2_44513	57.1108	49187685
solcap_snp_c2_44522	57.1109	49236421
solcap_snp_c1_13094	57.4164	49240884
solcap_snp_c1_15031	57.7267	49396213
solcap_snp_c2_52694	57.9347	49454055
solcap_snp_c2_52699	57.9348	49493916
solcap_snp_c2_52702	57.9349	49518286
solcap_snp_c2_49598	58.308	49759444
solcap_snp_c2_49596	58.3081	49759508
PotVar0063115	58.9785	49813162
PotVar0063036	58.9786	49813860
solcap_snp_c2_49600	58.9787	49814298
PotVar0096167	59.9156	50099269
PotVar0096178	59.9157	50099400
PotVar0096216	59.9158	50148913
PotVar0096222	59.9159	50149245
PotVar0096223	60.0667	50149309
solcap_snp_c1_10397	60.9869	50310526
solcap_snp_c2_34709	60.987	50368198
solcap_snp_c2_34705	60.9871	50368441
solcap_snp_c2_34717	60.9872	50543373
PotVar0096416	60.9873	50594487
solcap_snp_c2_36731	63.3723	51029951
solcap_snp_c2_36736	63.3724	51041693
solcap_snp_c2_36737	63.3725	51041770
solcap_snp_c1_10945	63.3726	51059801
solcap_snp_c2_36745	63.6447	51098713
solcap_snp_c2_36748	63.6448	51098940
PotVar0100113	63.6449	51136837
PotVar0100132	63.645	51137032
PotVar0100143	63.6451	51137133
PotVar0100147	63.6452	51137348
PotVar0100204	63.6453	51138094
PotVar0100215	63.6454	51138286
solcap_snp_c2_36760	63.7742	51192235
solcap_snp_c2_36763	63.7743	51194329
PotVar0100244	64.2822	51251873
PotVar0100280	64.2823	51252402
PotVar0100283	64.2824	51252466
PotVar0100301	64.2825	51253465
solcap_snp_c2_36779	64.2826	51263284
solcap_snp_c2_36780	64.2827	51263381
solcap_snp_c2_58288	64.8347	51320266
solcap_snp_c2_48441	64.9123	51358466
PotVar0100350	66.2991	51487087
PotVar0100388	66.2992	51487770
PotVar0100389	66.2993	51487780
PotVar0100457	66.7602	51488861
solcap_snp_c2_48447	66.7603	51488861
PotVar0100471	66.7604	51489474
PotVar0081130	67.3213	52157303
PotVar0081239	67.3214	52158230
PotVar0081240	67.3215	52158301
solcap_snp_c2_56726	67.3216	52189330
solcap_snp_c2_19144	68.3857	52270205
solcap_snp_c2_19135	68.3858	52333907
solcap_snp_c2_19085	68.3859	52453775
solcap_snp_c2_19081	68.386	52490785
solcap_snp_c2_19080	68.3861	52490848
solcap_snp_c2_19079	69.5019	52490868
solcap_snp_c2_19078	69.7723	52491248
solcap_snp_c2_19077	69.7724	52492440
solcap_snp_c2_19076	69.7725	52492677
solcap_snp_c2_19075	69.7726	52492783
solcap_snp_c2_19064	70.1912	52567732
solcap_snp_c1_6046	70.361	52576345
solcap_snp_c2_19020	71.6947	52712897
solcap_snp_c2_19018	71.6948	52714431
solcap_snp_c2_19017	71.6949	52714500
solcap_snp_c2_19013	71.695	52733012
solcap_snp_c2_19211	72.0603	52800147
solcap_snp_c2_19209	72.0604	52802270
PotVar0119174	72.6027	53138181
solcap_snp_c2_34604	72.6028	53138349
PotVar0119168	72.6029	53138489
PotVar0119156	72.603	53138615
PotVar0119145	72.6031	53138741
PotVar0119143	72.6032	53138777
PotVar0119128	72.6033	53139034
PotVar0119126	72.6034	53139119
PotVar0119121	72.6035	53139206
solcap_snp_c1_10390	72.7684	53149922
solcap_snp_c2_34566	73.1253	53217188
solcap_snp_c1_10384	73.1254	53250100
solcap_snp_c2_34587	73.9895	53326021
solcap_snp_c2_34590	73.9896	53349021
solcap_snp_c2_34608	74.2169	53386131
solcap_snp_c2_34632	74.4878	53456449
PotVar0119110	74.4879	53456626
PotVar0119101	74.488	53457013
solcap_snp_c2_34634	74.4881	53457013
solcap_snp_c2_34635	74.4882	53457076
solcap_snp_c2_34636	74.4883	53457133
solcap_snp_c2_34639	74.4884	53457649
solcap_snp_c2_34640	74.4885	53459520
solcap_snp_c2_34655	74.8498	53494603
PotVar0097375	74.8499	53731662
solcap_snp_c2_26631	75.7483	53735510
solcap_snp_c1_8297	76.0261	53823394
PotVar0097446	76.0262	53835652
PotVar0097448	76.0263	53835721
PotVar0097451	76.0264	53835804
PotVar0097462	76.0265	53835976
PotVar0097485	76.2467	53836858
PotVar0097491	76.2468	53837078
solcap_snp_c1_8293	76.2469	53877072
solcap_snp_c1_8282	76.4828	54022113
solcap_snp_c1_8300	77.3373	54295146
solcap_snp_c1_8237	77.3374	54357787
PotVar0097536	77.3375	54361711
solcap_snp_c1_16495	77.5535	54454507
PotVar0024071	77.5536	54669004
PotVar0024010	77.5537	54670111
PotVar0023990	77.5538	54750925
PotVar0023957	77.5539	54751516
PotVar0023850	77.554	54753970
PotVar0023817	77.5541	54754626
PotVar0023779	77.5542	54759104
PotVar0023745	77.7682	54775358
solcap_snp_c2_16994	77.7683	54835304
solcap_snp_c2_16998	77.7684	54838005
solcap_snp_c2_16999	77.769	54838024
solcap_snp_c2_17025	78.0247	54911350
solcap_snp_c2_17060	78.2902	55114519
solcap_snp_c1_5560	78.2903	55114825
solcap_snp_c1_5566	78.2904	55137894
solcap_snp_c1_5587	78.5947	55187986
solcap_snp_c2_17113	79.1494	55413239
solcap_snp_c2_17133	79.3902	55513976
solcap_snp_c2_46266	79.9839	55639343
solcap_snp_c2_46251	79.984	55669877
solcap_snp_c2_46239	79.9841	55672350
solcap_snp_c2_16068	84.02	56020021
solcap_snp_c1_8754	84.2243	56333030
solcap_snp_c2_28433	85.2107	56382148
solcap_snp_c2_28428	85.2108	56406109
PotVar0023602	85.4782	56439339
PotVar0023583	85.4783	56439624
PotVar0023579	85.4784	56439790
solcap_snp_c1_8723	85.877	56575689
solcap_snp_c1_8765	85.8771	56753066
solcap_snp_c1_8764	85.8772	56753163
PotVar0023184	85.8773	56783272

## Sheet: chr9
Supplementary Table 3. Molecular markers linkage map of chromosome 9.
Marker	Position (cM)	Physical Position
solcap_snp_c1_14394	0	739893
solcap_snp_c2_39080	2.25848	1376364
solcap_snp_c2_39081	2.25858	1376399
solcap_snp_c2_39084	2.25868	1376541
solcap_snp_c2_39085	2.25878	1376784
solcap_snp_c2_39086	2.25888	1377161
solcap_snp_c2_11087	3.62144	1560545
PotVar0011225	4.21237	1593214
PotVar0011236	4.21247	1593489
PotVar0011288	4.21257	1594731
PotVar0011302	4.21267	1595612
solcap_snp_c2_11062	4.22661	1640096
solcap_snp_c2_11005	4.77869	1958822
solcap_snp_c2_10966	4.98167	2024826
solcap_snp_c2_10964	4.98177	2078743
solcap_snp_c2_10963	4.98187	2078799
solcap_snp_c1_3598	4.98197	2080285
solcap_snp_c1_3597	4.98207	2081425
solcap_snp_c1_3596	4.98217	2081488
solcap_snp_c2_10959	4.98227	2082555
solcap_snp_c2_10958	5.26834	2082817
solcap_snp_c2_10956	5.26844	2083608
PotVar0011360	5.26854	2113575
PotVar0011361	5.53455	2113605
PotVar0011392	5.53465	2113876
PotVar0011522	5.53475	2115091
PotVar0011562	5.53485	2115833
PotVar0011614	5.53495	2142773
PotVar0011657	5.53505	2143194
PotVar0011673	5.53515	2143643
PotVar0011674	5.53525	2143694
PotVar0011713	5.53535	2144546
solcap_snp_c2_10906	6.50057	2346064
PotVar0011750	6.50067	2469888
PotVar0011794	6.50077	2470341
PotVar0011799	6.50087	2470414
PotVar0011849	6.50097	2471022
PotVar0011850	7.13699	2471034
PotVar0011885	7.34308	2471406
PotVar0011917	7.34318	2475575
PotVar0011927	7.34328	2475667
PotVar0011929	7.34338	2475672
PotVar0012013	7.56957	2476707
PotVar0012050	7.56967	2477070
solcap_snp_c2_10896	8.5819	2531544
solcap_snp_c2_39254	8.90072	2558320
solcap_snp_c2_39253	9.29845	2575766
solcap_snp_c2_39251	9.29855	2579438
solcap_snp_c2_39244	9.84732	2637464
PotVar0012073	10.1355	2679615
PotVar0012076	10.4226	2679698
solcap_snp_c2_39227	10.4227	2714044
solcap_snp_c2_39216	10.8246	2792921
solcap_snp_c2_39265	10.967	2868455
solcap_snp_c2_54953	11.7202	2929091
solcap_snp_c2_54955	11.927	2931242
solcap_snp_c2_32198	12.2596	3209833
solcap_snp_c2_32200	12.9319	3209935
solcap_snp_c2_32207	12.932	3224947
solcap_snp_c2_32211	12.9321	3225332
solcap_snp_c1_9651	13.1603	3324451
solcap_snp_c1_9652	13.7359	3371136
solcap_snp_c2_4030	13.8391	3619115
solcap_snp_c2_4041	14.9535	3689196
solcap_snp_c2_4045	14.9536	3710627
PotVar0012274	14.9537	3736800
PotVar0012284	14.9538	3736968
PotVar0012337	14.9539	3737678
PotVar0012338	14.954	3737744
PotVar0012376	14.9541	3738100
PotVar0012441	14.9542	3744053
PotVar0012446	14.9543	3744124
solcap_snp_c2_4048	14.9544	3746470
PotVar0012531	14.9545	3749114
PotVar0012533	14.9546	3749143
solcap_snp_c2_4092	15.068	3851456
solcap_snp_c2_4100	15.2214	3862379
solcap_snp_c1_1395	15.2215	3879644
solcap_snp_c2_4102	15.5381	3893063
solcap_snp_c1_1400	15.6279	3920030
solcap_snp_c2_4123	15.628	3957961
solcap_snp_c2_4124	15.7865	3958200
solcap_snp_c2_4138	16.3241	4023455
solcap_snp_c2_4156	17.357	4089445
solcap_snp_c2_4158	17.5813	4091032
solcap_snp_c2_4161	17.5814	4101462
solcap_snp_c1_1414	17.5815	4116550
solcap_snp_c2_4165	17.5816	4119060
solcap_snp_c2_4169	17.5817	4131049
solcap_snp_c1_1415	17.744	4165605
solcap_snp_c2_4187	19.1947	4358664
solcap_snp_c2_4192	19.1948	4386691
solcap_snp_c2_3942	19.8238	4792889
solcap_snp_c2_3943	19.8239	4793025
solcap_snp_c2_3944	19.824	4793164
solcap_snp_c2_3945	19.8241	4793207
solcap_snp_c2_3948	19.8242	4793518
solcap_snp_c2_3950	19.8243	4793758
solcap_snp_c1_1341	19.8244	4795129
solcap_snp_c2_3953	19.8245	4801715
solcap_snp_c2_3955	20.4248	4868281
solcap_snp_c2_3960	20.4249	4882338
solcap_snp_c2_3961	20.425	4882347
solcap_snp_c2_3962	20.4251	4889182
solcap_snp_c2_3963	20.4252	4889231
solcap_snp_c2_3966	20.5452	4892862
solcap_snp_c2_3969	20.6232	4893114
solcap_snp_c2_3970	20.6233	4903328
solcap_snp_c2_3976	21.6946	4916828
solcap_snp_c2_3980	21.6947	4947101
solcap_snp_c2_3983	21.6948	5016966
solcap_snp_c2_3984	21.8238	5032856
solcap_snp_c1_1352	21.8239	5037539
solcap_snp_c2_3986	21.824	5068865
solcap_snp_c2_3996	22.2303	5130860
solcap_snp_c2_3997	22.2304	5130873
solcap_snp_c2_4000	22.3159	5133991
PotVar0073342	22.4009	5145468
PotVar0073232	22.5409	5146429
PotVar0073230	22.541	5146524
solcap_snp_c2_4013	23.2848	5239608
solcap_snp_c2_4024	23.2849	5267171
solcap_snp_c2_35470	23.285	5290621
solcap_snp_c2_35446	23.5307	5353104
solcap_snp_c2_35437	23.5308	5367131
solcap_snp_c2_35433	23.5309	5427626
solcap_snp_c2_35424	23.531	5468576
solcap_snp_c2_35421	23.5311	5471034
solcap_snp_c2_35406	23.5312	5552144
solcap_snp_c2_35382	23.5313	5556880
solcap_snp_c2_35376	23.8442	5590376
solcap_snp_c2_35374	23.8443	5590494
solcap_snp_c2_35372	24.1254	5594595
solcap_snp_c2_35411	24.1255	5698900
solcap_snp_c2_13322	24.7413	6062798
solcap_snp_c2_13317	24.7414	6078330
solcap_snp_c2_13304	25.0672	6087560
solcap_snp_c2_13281	25.0673	6277743
solcap_snp_c1_4271	25.3198	6389488
solcap_snp_c2_13242	26.0797	6414137
solcap_snp_c1_4248	26.2407	6577412
solcap_snp_c2_13195	26.2408	6579865
solcap_snp_c2_13194	26.2409	6579975
solcap_snp_c2_13193	26.241	6580364
solcap_snp_c2_13180	26.2851	6722333
solcap_snp_c1_4238	26.3197	6726820
PotVar0133858	26.3586	6770254
PotVar0133857	26.4008	6770266
solcap_snp_c2_13163	26.4009	6770427
PotVar0133829	26.401	6770581
PotVar0133826	26.4011	6770692
PotVar0133799	26.4012	6772294
PotVar0133736	26.4013	6772919
PotVar0133733	26.4014	6772980
PotVar0133660	26.7536	6773584
solcap_snp_c2_13138	26.8682	6982649
solcap_snp_c2_13136	26.9343	6982808
solcap_snp_c2_13135	27.0032	6983029
solcap_snp_c2_13134	27.0033	6983042
solcap_snp_c1_4228	27.0034	6985383
solcap_snp_c2_13099	27.7076	7145321
solcap_snp_c1_4222	27.7077	7147029
solcap_snp_c1_4213	27.8977	7229870
solcap_snp_c1_4282	27.8978	7250032
solcap_snp_c1_15470	27.8979	7427636
PotVar0034357	27.898	7518453
PotVar0034334	27.8981	7518708
PotVar0034302	27.8982	7519936
PotVar0034287	27.8983	7522292
PotVar0034277	27.8984	7522448
PotVar0034276	27.8985	7522593
PotVar0034274	27.8986	7523183
PotVar0034273	27.8987	7523237
PotVar0034240	28.2734	7524393
PotVar0034215	28.2735	7531765
solcap_snp_c1_14783	28.4674	7778783
PotVar0133086	28.6657	7830592
PotVar0133046	28.6658	7831140
PotVar0133035	28.6659	7834253
PotVar0133012	28.666	7835011
PotVar0132984	28.6661	7835254
PotVar0132979	28.6662	7835440
PotVar0132977	28.6663	7835458
PotVar0132971	28.6664	7835623
PotVar0132961	28.6665	7835813
PotVar0132958	28.6666	7835889
PotVar0132941	28.6667	7836001
solcap_snp_c2_50238	28.8813	7882786
solcap_snp_c2_50247	28.8814	7900964
solcap_snp_c2_52515	29.0044	8043110
solcap_snp_c2_52517	29.125	8043250
solcap_snp_c2_52518	29.1251	8043289
solcap_snp_c2_52519	29.1252	8043361
solcap_snp_c2_52521	29.1253	8043736
solcap_snp_c2_52522	29.1254	8051081
solcap_snp_c2_52523	29.1255	8051126
solcap_snp_c2_46427	29.2769	8311988
solcap_snp_c2_46431	29.5501	8359750
solcap_snp_c1_13785	29.7512	8474261
solcap_snp_c1_13786	29.7513	8474270
solcap_snp_c2_4420	30.0114	8660455
solcap_snp_c2_4415	30.0115	8670291
PotVar0117676	30.4824	8794822
PotVar0117719	30.4825	8796430
PotVar0117721	30.4826	8796626
PotVar0117734	30.4827	8797124
PotVar0117735	30.4828	8797281
PotVar0117751	30.4829	8797454
PotVar0117752	30.4857	8797468
PotVar0117765	30.5466	8799307
PotVar0117779	30.5467	8799463
PotVar0117781	30.5468	8799543
solcap_snp_c2_54609	30.5469	8882591
solcap_snp_c2_54613	30.547	8918435
solcap_snp_c2_31988	30.8605	9726696
solcap_snp_c2_31989	30.8606	9726822
solcap_snp_c2_31991	30.8607	9727038
solcap_snp_c2_55129	30.8608	10235747
solcap_snp_c2_49770	31.107	10351747
solcap_snp_c2_49766	31.1071	10352617
solcap_snp_c2_49764	31.1072	10352719
solcap_snp_c1_14668	31.1073	10353176
solcap_snp_c1_14676	31.5319	10414891
solcap_snp_c1_14674	31.532	10415002
solcap_snp_c1_14669	31.5321	10451737
solcap_snp_c1_15780	31.5322	10511206
solcap_snp_c2_54877	32.0283	10630790
solcap_snp_c2_58234	32.0284	11226418
PotVar0107325	32.0285	11226425
PotVar0107313	32.2483	11226658
solcap_snp_c2_58236	32.2484	11226827
solcap_snp_c2_52898	32.2485	11311563
solcap_snp_c2_23459	32.5609	11545743
solcap_snp_c2_23449	32.561	11720990
solcap_snp_c2_23439	32.5611	11805410
solcap_snp_c2_23431	32.7419	11806183
solcap_snp_c2_38526	32.9321	12280244
solcap_snp_c2_46030	33.5506	12795763
solcap_snp_c2_4381	33.5507	12951888
solcap_snp_c2_4383	33.5508	12952003
solcap_snp_c2_4385	33.5509	12952173
solcap_snp_c2_4391	34.2573	13304468
solcap_snp_c2_4392	34.2574	13342315
solcap_snp_c2_4396	34.2575	13620771
solcap_snp_c2_4397	34.2576	13620858
solcap_snp_c2_4400	34.2577	13621663
solcap_snp_c2_4401	34.2578	13622370
solcap_snp_c2_4404	34.2579	13622577
solcap_snp_c2_4405	34.258	13623138
solcap_snp_c2_33625	34.2581	14852854
solcap_snp_c2_33626	34.2582	14853028
solcap_snp_c2_33627	34.2583	14853083
solcap_snp_c1_9490	34.4833	15572748
solcap_snp_c2_31383	34.9588	15761159
solcap_snp_c2_562	35.2244	17846099
solcap_snp_c1_449	35.2245	18826247
PotVar0012782	35.3173	19166459
PotVar0012749	35.3174	19166669
PotVar0012744	35.3175	19166733
solcap_snp_c2_1915	35.3176	19231866
solcap_snp_c2_1916	35.3177	19232127
solcap_snp_c2_53558	35.5442	20712182
solcap_snp_c2_53559	35.5443	20712307
solcap_snp_c2_58369	35.5444	20845141
solcap_snp_c2_58373	35.5445	20845412
solcap_snp_c1_8210	35.5446	21192924
solcap_snp_c2_26516	35.5447	21264794
solcap_snp_c2_26515	35.5448	21264861
solcap_snp_c2_26509	35.5449	21407743
solcap_snp_c2_44951	35.6377	22080291
solcap_snp_c2_19536	35.6378	23230273
solcap_snp_c2_19537	35.6379	23230341
solcap_snp_c2_37404	35.638	26817078
solcap_snp_c2_37406	35.6381	26817485
solcap_snp_c2_37407	35.6382	26817564
solcap_snp_c1_958	35.6383	28754299
PotVar0054638	35.6384	28888518
PotVar0054648	35.6385	28888958
PotVar0054651	35.6386	28889059
PotVar0054663	35.6387	28889238
solcap_snp_c2_3207	35.6388	29070293
solcap_snp_c2_3203	35.6389	29071235
solcap_snp_c2_3202	35.639	29072373
PotVar0007437	36.8884	30792398
PotVar0007448	36.976	30792488
PotVar0007465	36.9761	30792707
PotVar0007492	36.9762	30793023
PotVar0007531	36.9763	30810012
PotVar0007532	36.9764	30810067
PotVar0007554	36.9765	30810374
PotVar0007597	36.9766	30812341
solcap_snp_c2_16315	36.9767	30812479
solcap_snp_c2_16314	36.9768	30812573
PotVar0007613	36.9769	30812635
solcap_snp_c1_5217	36.977	31049156
solcap_snp_c2_16305	37.3132	31161827
solcap_snp_c2_16277	37.6861	31520501
solcap_snp_c2_16275	37.6862	31521212
solcap_snp_c2_16274	37.6863	31521320
solcap_snp_c2_22759	37.6864	31630215
solcap_snp_c2_22761	37.6865	31630431
solcap_snp_c2_57538	37.8669	31789014
solcap_snp_c1_16394	38.052	31985157
solcap_snp_c2_56692	38.0521	31988498
solcap_snp_c2_22757	38.0522	32235107
solcap_snp_c2_22758	38.0523	32236211
solcap_snp_c2_1512	38.5665	32567472
solcap_snp_c2_55124	38.5666	32588719
solcap_snp_c2_1516	38.5667	32676791
PotVar0111222	38.5668	33675988
PotVar0111212	38.5669	33676333
solcap_snp_c2_1484	38.567	33681088
solcap_snp_c2_1486	38.6754	33681501
solcap_snp_c1_364	38.6755	33741791
solcap_snp_c2_1493	38.6756	34912758
solcap_snp_c2_681	38.6757	36646088
solcap_snp_c1_216	38.6758	37335897
solcap_snp_c1_219	38.6798	38263840
solcap_snp_c2_699	38.7087	38646878
solcap_snp_c2_701	38.7088	38648276
solcap_snp_c1_2319	38.7089	39333997
PotVar0122570	40.3235	42912324
solcap_snp_c2_55046	40.3236	43193960
solcap_snp_c2_20473	40.3237	43780085
solcap_snp_c2_56183	40.4961	43843885
solcap_snp_c2_56179	40.4962	43845142
solcap_snp_c2_56172	40.4963	43861030
solcap_snp_c2_20470	40.4964	43906684
solcap_snp_c2_20469	40.7314	43906749
solcap_snp_c1_6476	41.1744	43993316
solcap_snp_c2_20481	41.1745	44403906
solcap_snp_c2_20479	41.1746	44405128
solcap_snp_c2_27658	41.2094	44957023
solcap_snp_c2_27657	41.6392	44957425
solcap_snp_c2_27650	41.8401	45196976
solcap_snp_c2_27648	41.8402	45197297
solcap_snp_c2_27644	41.8403	45198857
solcap_snp_c2_52833	41.9666	45348579
solcap_snp_c2_32638	42.4238	45458640
solcap_snp_c2_27652	42.4239	45562819
solcap_snp_c2_27635	43.1728	45572164
solcap_snp_c2_12769	43.1729	45640575
solcap_snp_c2_12770	43.173	45642240
solcap_snp_c2_12758	45.2528	45788396
solcap_snp_c2_12761	45.4025	45951002
solcap_snp_c2_12765	45.4026	46017961
solcap_snp_c1_4077	45.4027	46077355
solcap_snp_c2_12778	45.4028	46079913
solcap_snp_c2_12786	45.6651	46131771
solcap_snp_c1_4082	45.6652	46134840
solcap_snp_c1_4087	45.6653	46138122
solcap_snp_c2_12782	45.6654	46148187
solcap_snp_c2_12794	45.6655	46172405
solcap_snp_c2_12796	45.6656	46174420
solcap_snp_c2_12803	46.1535	46204520
solcap_snp_c2_12811	46.2232	46292191
solcap_snp_c2_44828	47.0192	46665243
solcap_snp_c2_44827	47.0193	46667714
solcap_snp_c2_44824	47.0194	46683467
solcap_snp_c2_44820	47.0195	46685159
solcap_snp_c2_44819	47.0196	46685162
solcap_snp_c2_44817	47.0197	46686242
solcap_snp_c2_44816	47.0198	46687275
solcap_snp_c2_44815	47.0199	46687355
solcap_snp_c2_44812	47.6278	46740866
solcap_snp_c2_44811	47.6279	46741164
solcap_snp_c2_44805	47.628	46744449
solcap_snp_c2_44804	47.6281	46744528
solcap_snp_c2_44834	47.9122	46781005
solcap_snp_c2_44833	47.9123	46783855
solcap_snp_c1_13612	47.9124	46837871
solcap_snp_c2_45884	48.4397	46941077
solcap_snp_c2_45883	48.4398	46942759
solcap_snp_c2_45887	48.4399	47187905
solcap_snp_c2_45886	48.7778	47200447
solcap_snp_c2_56074	49.3451	47237043
solcap_snp_c1_12805	49.3452	47413174
solcap_snp_c1_12798	49.3453	47458102
solcap_snp_c1_12797	49.3454	47458361
solcap_snp_c2_43434	49.5126	47544612
solcap_snp_c1_12794	49.5127	47545577
PotVar0051099	49.5128	47553374
PotVar0051178	49.7698	47584714
PotVar0051195	49.8947	47585088
PotVar0051363	49.8948	47586990
solcap_snp_c2_43444	49.8949	47588028
solcap_snp_c2_43437	49.895	47652364
solcap_snp_c1_12802	49.8951	47662364
solcap_snp_c1_6192	51.3999	47753124
solcap_snp_c1_6196	51.4	47754984
solcap_snp_c1_6166	51.4001	47918632
solcap_snp_c1_6176	51.4002	47954945
PotVar0051475	51.9472	48063898
PotVar0051497	51.9473	48069790
solcap_snp_c2_19556	51.9474	48069790
PotVar0051520	51.9475	48070176
PotVar0051583	51.9476	48071305
PotVar0051600	51.9477	48073069
solcap_snp_c2_19565	51.9478	48113587
solcap_snp_c2_19569	52.2866	48122740
solcap_snp_c1_6183	52.9098	48173462
PotVar0051650	53.1855	48247559
solcap_snp_c1_13515	53.1856	48611285
solcap_snp_c2_45570	54.4772	48721662
solcap_snp_c2_45567	56.162	48735918
solcap_snp_c2_56977	56.1621	48835334
solcap_snp_c1_16062	56.1622	49004431
solcap_snp_c2_54867	57.1471	49140012
solcap_snp_c1_13996	57.1472	49453657
solcap_snp_c1_16459	57.1473	49537802
PotVar0058446	57.1474	49545836
PotVar0058492	57.2668	49546515
solcap_snp_c2_51155	57.272	49754441
solcap_snp_c2_39494	58.1473	50009166
solcap_snp_c2_39488	59.1889	50078813
PotVar0058526	59.6315	50163415
solcap_snp_c2_39509	59.6316	50174507
solcap_snp_c2_14635	60.7148	50366655
solcap_snp_c2_14636	60.7149	50367159
solcap_snp_c2_14637	60.715	50367228
solcap_snp_c2_14639	60.8432	50367631
solcap_snp_c2_14640	60.8433	50367678
solcap_snp_c2_52532	61.1179	50417553
solcap_snp_c2_52544	61.118	50435563
solcap_snp_c2_52543	61.7267	50464344
solcap_snp_c2_39840	61.8277	50790953
solcap_snp_c1_11779	61.8278	50791573
solcap_snp_c1_11777	61.8375	50806427
PotVar0093848	64.1472	51193466
PotVar0093957	64.1473	51194512
PotVar0093997	64.1474	51195417
PotVar0094024	64.1475	51195803
PotVar0094025	64.1476	51195812
PotVar0094049	64.1477	51197864
solcap_snp_c1_11907	65.2597	51386555
solcap_snp_c2_4196	65.9306	51565563
PotVar0129336	65.9307	51666610
PotVar0129270	66.1091	51667461
PotVar0129259	66.1092	51667566
PotVar0129254	66.1093	51667600
solcap_snp_c1_16413	66.4849	51888213
solcap_snp_c1_16414	66.485	51888503
solcap_snp_c2_40883	66.8212	51989783
solcap_snp_c2_40879	67.4236	52027191
solcap_snp_c2_40867	68.0351	52135021
solcap_snp_c2_40863	68.0352	52135600
solcap_snp_c2_40858	68.0353	52147350
solcap_snp_c2_51346	68.1697	52307123
PotVar0101957	68.6437	52406324
PotVar0101941	68.6438	52406497
PotVar0101916	68.6439	52407969
PotVar0101905	68.809	52408119
solcap_snp_c2_43032	69.0795	52446019
solcap_snp_c2_43049	69.0796	52452548
solcap_snp_c2_42961	69.3237	52503159
solcap_snp_c2_42964	69.5733	52519931
PotVar0101868	69.5734	52567797
PotVar0101864	69.5735	52567954
PotVar0101834	69.5736	52568992
PotVar0101814	69.5737	52569147
PotVar0101691	69.5738	52570600
solcap_snp_c2_43012	70.0217	52657843
PotVar0103703	70.2318	52768129
PotVar0103704	70.5816	52768183
solcap_snp_c2_27054	71.0179	52799014
solcap_snp_c2_27003	71.6306	52996314
PotVar0103851	71.6307	53048245
PotVar0103873	71.9465	53048670
PotVar0103876	71.9466	53048805
solcap_snp_c1_8390	72.2135	53090017
solcap_snp_c2_26979	72.4538	53091476
solcap_snp_c2_26965	72.4539	53109849
solcap_snp_c2_26948	72.454	53185953
solcap_snp_c1_15717	73.2736	53315931
solcap_snp_c1_8415	73.6924	53402816
PotVar0103890	73.6925	53421185
PotVar0103918	73.6926	53422984
PotVar0107780	74.7612	53671802
PotVar0107764	74.7613	53672123
PotVar0107746	74.7614	53672545
PotVar0107708	74.7615	53673056
solcap_snp_c1_12178	74.7616	53687100
solcap_snp_c1_12179	75.3991	53723836
solcap_snp_c2_54325	75.3992	53858653
solcap_snp_c1_6930	75.3993	53909198
solcap_snp_c1_6936	75.8209	53911437
solcap_snp_c2_22094	75.821	53961387
solcap_snp_c2_21992	76.6658	54060817
solcap_snp_c2_21999	76.6659	54117387
PotVar0107680	76.666	54117610
PotVar0107677	76.6661	54117628
PotVar0107676	76.6662	54117673
solcap_snp_c2_22003	76.6663	54117688
PotVar0107672	76.6664	54117766
PotVar0107638	76.8609	54121271
solcap_snp_c2_22024	77.206	54194311
PotVar0107514	77.5159	54230560
PotVar0107499	77.516	54230814
PotVar0107475	78.2505	54232924
solcap_snp_c2_22033	78.3542	54354713
solcap_snp_c2_22040	78.6039	54392089
solcap_snp_c2_22041	78.604	54397297
solcap_snp_c2_22049	78.6041	54470269
solcap_snp_c2_22069	78.6042	54548387
solcap_snp_c2_22070	79.1165	54571620
solcap_snp_c2_22072	79.1166	54572498
solcap_snp_c2_22073	79.1167	54572501
solcap_snp_c2_22076	79.6636	54674810
PotVar0118744	79.6637	54711947
solcap_snp_c2_46790	79.6638	54929223
solcap_snp_c2_46783	79.6639	54956193
solcap_snp_c2_46779	79.664	54956475
solcap_snp_c2_46777	79.6641	54965286
solcap_snp_c2_46776	79.9023	54976074
solcap_snp_c1_13883	79.9024	54976154
solcap_snp_c2_46797	79.9025	55038965
solcap_snp_c2_46796	79.9026	55039035
solcap_snp_c2_46795	79.9027	55039052
solcap_snp_c2_29415	80.1924	55087556
solcap_snp_c2_29310	80.5442	55142095
solcap_snp_c2_29317	80.5443	55182321
solcap_snp_c2_29323	81.0958	55218983
solcap_snp_c1_8944	81.0959	55283204
solcap_snp_c2_29344	81.096	55393249
solcap_snp_c1_8950	81.0961	55482081
PotVar0061732	81.0962	55501273
PotVar0061774	81.0963	55501879
PotVar0061831	81.2466	55502618
solcap_snp_c2_29981	82.277	55794340
solcap_snp_c2_29945	83.0819	55948860
solcap_snp_c2_30008	83.082	56184931
solcap_snp_c2_20755	83.0821	56380432
solcap_snp_c1_6592	83.0822	56381805
PotVar0073152	83.2062	56403526
PotVar0073132	83.2063	56403660
PotVar0073119	83.2064	56403942
PotVar0072996	83.2065	56405631
PotVar0072988	83.2066	56405832
solcap_snp_c2_20714	83.2994	56448487
solcap_snp_c2_13969	83.2995	56466455
solcap_snp_c1_6585	83.6211	56511696
PotVar0072968	83.6212	56524325
PotVar0072917	83.6213	56524821
PotVar0072857	83.6214	56526473
PotVar0072736	83.6215	56527500
PotVar0072729	83.6216	56528679
solcap_snp_c1_6571	83.6217	56563935
PotVar0072691	83.6218	56634169
PotVar0072686	83.6219	56634230
PotVar0072670	83.622	56634375
PotVar0072653	83.6221	56634656
PotVar0072634	83.6222	56634923
PotVar0072611	83.6223	56635315
solcap_snp_c1_6556	83.6224	56659770
solcap_snp_c1_6546	84.2283	56713821
solcap_snp_c2_20622	84.2284	56813198
solcap_snp_c2_20618	84.2285	56876796
solcap_snp_c1_6533	84.2286	56910072
solcap_snp_c2_20606	84.2287	56912312
solcap_snp_c2_20589	84.3803	56940939
PotVar0072548	84.3804	57005254
PotVar0072545	84.6501	57005312
PotVar0072536	84.6502	57005393
PotVar0072534	84.6503	57005537
PotVar0072507	84.6504	57005930
PotVar0072477	84.6505	57006653
PotVar0072472	84.6506	57006686
solcap_snp_c2_20698	84.8386	57006811
PotVar0072468	84.8387	57006865
solcap_snp_c2_20667	84.8388	57072665
solcap_snp_c2_20640	85.2458	57134490
PotVar0010983	85.5844	57166395
PotVar0011035	85.5845	57167023
PotVar0011047	85.5846	57167101
PotVar0011066	85.5847	57167296
PotVar0011079	85.5848	57167688
solcap_snp_c2_40033	85.5849	57250266
solcap_snp_c1_11853	85.9142	57346489
solcap_snp_c2_40015	85.9143	57359438
solcap_snp_c1_11867	86.0675	57421047
PotVar0011101	86.0676	57421071
PotVar0011164	86.0677	57422681
PotVar0011173	86.0678	57422879
PotVar0011182	86.0818	57423038
solcap_snp_c2_40086	86.0819	57423038
PotVar0011184	86.082	57423104
solcap_snp_c2_40085	86.0821	57423104
solcap_snp_c2_40084	86.0822	57423119
PotVar0011188	86.0823	57423179
PotVar0011189	86.0824	57423209
solcap_snp_c2_40078	86.0825	57518148
solcap_snp_c2_43241	87.2236	57778395
solcap_snp_c2_43242	87.2237	57779733
solcap_snp_c2_43243	87.2238	57779841
solcap_snp_c2_3079	87.2239	58240294
solcap_snp_c2_3078	87.8528	58261157
solcap_snp_c1_914	88.4846	58272671
solcap_snp_c2_3066	88.9356	58358578
solcap_snp_c2_3052	88.9357	58449028
solcap_snp_c2_3021	89.959	58582477
solcap_snp_c2_3010	90.6223	58670590
PotVar0105170	90.6224	58686737
PotVar0105194	90.6225	58687044
PotVar0105222	90.6226	58687906
PotVar0105228	90.6227	58687944
PotVar0105246	90.6228	58688384
PotVar0105281	90.6229	58689049
solcap_snp_c2_2998	90.623	58689196
PotVar0105291	90.7936	58737148
PotVar0105349	90.7937	58738870
solcap_snp_c2_3073	91.0791	58956854
solcap_snp_c2_2992	91.0792	58997370
solcap_snp_c2_48042	91.5177	59139277
solcap_snp_c1_14205	91.6816	59225663
PotVar0108739	91.6817	59232714
PotVar0108738	91.6818	59232765
PotVar0108724	91.6819	59232974
PotVar0108720	91.682	59233052
PotVar0108713	91.6821	59233184
PotVar0108699	91.6822	59233382
PotVar0108697	91.6823	59233403
PotVar0108690	91.6824	59233592
solcap_snp_c2_48033	92.651	59290077
solcap_snp_c2_48041	92.6511	59300365
solcap_snp_c1_16490	92.6512	59456306
solcap_snp_c1_16106	93.0027	59475851
solcap_snp_c2_55484	93.0028	59483296
solcap_snp_c2_55483	93.0029	59483310
solcap_snp_c2_55481	93.003	59483431
PotVar0108644	93.0031	59586295
PotVar0108638	93.0032	59586370
PotVar0108629	93.0033	59586469
PotVar0108623	93.4222	59586574
PotVar0108622	93.4223	59586577
PotVar0108613	93.4224	59586817
solcap_snp_c2_47939	93.4225	59598694
solcap_snp_c2_47932	93.5832	59606285
solcap_snp_c2_47929	93.5833	59607569
solcap_snp_c2_20879	95.3516	60097041
solcap_snp_c1_6621	95.5209	60121835
solcap_snp_c2_56418	95.521	60182931
solcap_snp_c2_35655	96.2783	60250917
solcap_snp_c2_35612	96.2784	60416070
PotVar0096975	97.1372	60561348
solcap_snp_c1_10579	97.2618	60562325
PotVar0097016	97.2619	60562858
PotVar0097020	97.262	60563436
PotVar0097065	97.2621	60565011
PotVar0097077	97.2622	60565661
PotVar0097174	97.2623	60568374
PotVar0097245	97.2624	60570643
solcap_snp_c1_8566	97.8989	61051598
solcap_snp_c1_8560	97.899	61075452
PotVar0122158	97.8991	61079012
solcap_snp_c2_27716	97.8992	61157938
solcap_snp_c2_27715	98.1496	61158029
solcap_snp_c1_8549	98.1497	61209710
solcap_snp_c2_27699	98.1498	61320303
solcap_snp_c1_8575	98.1499	61393108
solcap_snp_c2_27765	98.15	61466136
solcap_snp_c2_27763	98.1501	61466237
solcap_snp_c2_27761	98.1502	61470614

## Sheet: chr10
Supplementary Table 3. Molecular markers linkage map of chromosome 10.
Marker	Position (cM)	Physical Position
PotVar0065625	0	1038531
PotVar0065623	0.0001	1038689
PotVar0065612	0.0002	1096336
PotVar0065608	0.0003	1096379
PotVar0065443	0.0004	1100838
PotVar0065380	0.0005	1101809
solcap_snp_c2_1475	0.000600001	1121595
PotVar0065369	0.000700001	1130338
solcap_snp_c2_823	1.31841	1193507
solcap_snp_c2_826	1.31851	1204144
solcap_snp_c2_873	1.57198	1311410
solcap_snp_c2_885	1.73191	1367187
solcap_snp_c2_886	1.73201	1372642
PotVar0065119	1.73211	1374955
solcap_snp_c2_950	2.61705	1697864
solcap_snp_c2_984	2.61715	1759258
PotVar0116626	2.83175	1767509
PotVar0116629	2.83185	1767573
solcap_snp_c2_989	2.83195	1779020
solcap_snp_c2_992	4.56101	1861465
PotVar0116672	4.69119	1909189
PotVar0116820	4.69129	1912261
solcap_snp_c1_274	5.15112	1960699
solcap_snp_c1_16114	5.15122	2093720
solcap_snp_c2_1066	5.59576	2218157
solcap_snp_c2_1077	6.13471	2345887
solcap_snp_c2_1093	6.29316	2352583
solcap_snp_c2_1097	6.29326	2353088
solcap_snp_c2_1101	6.29336	2354869
solcap_snp_c2_1102	6.29346	2356573
solcap_snp_c2_1104	6.29356	2356600
solcap_snp_c2_1106	6.29366	2356795
solcap_snp_c1_289	6.29376	2468562
solcap_snp_c2_1155	7.03883	2487178
solcap_snp_c2_1157	7.09076	2487346
PotVar0104285	7.58047	2560050
PotVar0104266	7.58057	2560262
PotVar0104010	8.11889	2647495
PotVar0104009	8.11899	2647561
PotVar0104004	8.11909	2647598
PotVar0103987	8.11919	2647779
solcap_snp_c2_1220	8.35654	2666937
solcap_snp_c2_1263	9.96689	2741776
PotVar0120148	10.1883	3195410
PotVar0120165	10.1884	3195791
PotVar0120166	10.1885	3195849
PotVar0120175	10.482	3195992
solcap_snp_c1_10351	11.0244	3340707
solcap_snp_c2_34459	12.5663	3608967
solcap_snp_c2_54139	12.8628	3791291
PotVar0129166	13.1447	3920191
PotVar0129047	13.1448	3924141
PotVar0129023	13.1449	3924564
solcap_snp_c2_44240	13.145	3931873
solcap_snp_c2_44264	13.6302	3988349
solcap_snp_c2_44266	13.6303	3991078
solcap_snp_c1_13006	13.6304	4043034
PotVar0108437	14.1767	4435988
PotVar0108296	14.1768	4437944
PotVar0108295	14.1769	4437985
solcap_snp_c2_24717	14.4497	4503619
PotVar0108284	14.7223	4568977
PotVar0108182	14.7224	4572009
PotVar0108120	14.7225	4572587
solcap_snp_c2_24739	14.7226	4606889
PotVar0108060	14.7227	4620930
solcap_snp_c1_7793	14.7228	4622583
PotVar0107928	15.5479	4869502
PotVar0107905	15.548	4870152
PotVar0107893	15.5481	4870467
PotVar0107881	15.5482	4870632
PotVar0107880	15.8116	4870668
solcap_snp_c1_12588	15.8117	5026436
solcap_snp_c2_42733	16.4346	5182178
solcap_snp_c1_12584	17.2095	5232221
solcap_snp_c1_12594	17.2096	5254399
solcap_snp_c2_42734	17.5991	5285413
solcap_snp_c2_39868	17.628	5879492
solcap_snp_c1_11801	17.6281	5989940
solcap_snp_c1_11802	17.6282	5992157
solcap_snp_c1_11804	17.6283	5992298
solcap_snp_c1_11806	17.6284	6151401
solcap_snp_c2_32786	18.7953	6303532
solcap_snp_c2_32790	19.1632	6306500
solcap_snp_c2_32739	19.1633	6335907
solcap_snp_c2_32740	19.1634	6336014
solcap_snp_c1_9799	19.1635	6439438
solcap_snp_c2_32768	21.9249	6571951
solcap_snp_c2_32779	21.925	6744394
PotVar0119513	25.3451	8861500
PotVar0119518	25.3452	8861748
PotVar0029603	25.3453	11045849
PotVar0112028	25.3454	11545871
PotVar0112050	25.3455	11745718
PotVar0112053	25.3456	11745788
solcap_snp_c2_40523	25.3457	14785936
solcap_snp_c2_40522	25.3458	14786019
solcap_snp_c1_17	25.3459	15788247
solcap_snp_c2_56	25.346	15816725
solcap_snp_c2_55	25.3461	15913000
solcap_snp_c2_54	25.3462	15917654
PotVar0007417	25.3972	16354796
solcap_snp_c2_57273	25.4963	17627250
solcap_snp_c2_57274	25.4964	17630100
solcap_snp_c2_51	25.4965	17699244
PotVar0007258	25.4966	17930229
solcap_snp_c2_47	25.4967	18124336
PotVar0099304	25.4968	18391935
solcap_snp_c2_15658	25.4969	18710197
solcap_snp_c1_14048	26.1709	19895866
solcap_snp_c1_14047	26.171	20040041
solcap_snp_c1_14045	26.1711	20042336
solcap_snp_c1_14053	26.1712	20101484
solcap_snp_c2_57991	26.1713	20124347
solcap_snp_c1_16651	26.1714	20126251
solcap_snp_c1_16652	26.1715	20126294
solcap_snp_c1_14052	26.1716	20137871
solcap_snp_c2_55085	26.173	20334943
solcap_snp_c2_1905	26.1731	23213420
solcap_snp_c2_1904	26.1732	23213630
solcap_snp_c2_1903	26.1733	23213794
solcap_snp_c2_1901	26.1734	23215046
solcap_snp_c2_52793	26.1735	23430316
solcap_snp_c2_52794	26.1736	23432536
solcap_snp_c2_52795	26.1737	23433380
PotVar0004366	26.1738	23867918
solcap_snp_c2_1898	26.1739	23961414
PotVar0004372	27.0528	24214037
solcap_snp_c2_49643	27.0529	26354682
solcap_snp_c2_9019	27.053	27378979
PotVar0014585	27.0531	27379251
solcap_snp_c2_9021	27.0532	27390323
solcap_snp_c1_3060	27.0533	27650671
solcap_snp_c2_9028	27.0534	27698760
PotVar0014600	27.0535	27824089
solcap_snp_c1_3057	27.0536	28438797
solcap_snp_c1_3054	27.0537	29630093
solcap_snp_c2_9013	27.0538	29631214
solcap_snp_c1_3051	27.0539	29740160
solcap_snp_c1_3050	27.054	29741045
solcap_snp_c1_3049	27.0541	29741129
solcap_snp_c2_9014	27.0542	29813946
solcap_snp_c1_3055	27.0543	29814382
solcap_snp_c2_46146	27.3043	30093997
solcap_snp_c1_13683	27.3044	30094746
solcap_snp_c1_13682	27.3045	30096205
solcap_snp_c1_13681	27.3046	30097412
solcap_snp_c2_46144	27.3047	30116697
solcap_snp_c1_7	27.5761	32251718
solcap_snp_c2_45	27.5762	32527590
solcap_snp_c2_39	27.5763	32862567
solcap_snp_c2_37	27.5764	32862744
solcap_snp_c1_5	27.5765	32869283
solcap_snp_c2_34	27.5766	33235473
solcap_snp_c1_1	27.5767	33993379
solcap_snp_c2_63	27.5768	34302921
solcap_snp_c2_18265	27.5769	36225437
solcap_snp_c2_19215	29.1278	38388326
solcap_snp_c1_6070	29.1279	38389850
solcap_snp_c2_19218	29.128	38416897
solcap_snp_c2_19222	30.4638	38722150
solcap_snp_c2_19223	30.4639	38722264
solcap_snp_c2_19224	30.464	38723283
solcap_snp_c2_19225	30.4641	38723959
solcap_snp_c2_19226	30.4642	38723992
solcap_snp_c2_33008	32.9833	39738068
solcap_snp_c2_49184	32.9834	40653537
solcap_snp_c1_2673	33.1832	42450489
solcap_snp_c2_38274	36.5714	43663898
solcap_snp_c2_38273	36.7798	43666116
solcap_snp_c2_38262	36.9889	43732098
solcap_snp_c2_38260	36.989	43736871
PotVar0051902	38.6679	44047330
PotVar0051881	38.668	44047677
PotVar0051862	38.6681	44048092
PotVar0051833	38.8077	44048732
solcap_snp_c2_11679	38.8096	44059940
solcap_snp_c2_11609	38.8097	44202119
solcap_snp_c2_34553	39.3059	44723084
PotVar0123577	39.306	44858001
PotVar0123578	39.6971	44858010
solcap_snp_c2_54932	40.2339	45025424
solcap_snp_c2_48929	40.5815	45169330
solcap_snp_c2_48927	41.3763	45169473
solcap_snp_c2_48926	41.9411	45274006
solcap_snp_c1_14465	42.7253	45347792
solcap_snp_c2_40826	43.4811	45821679
solcap_snp_c2_40833	43.4812	45898747
solcap_snp_c1_12031	43.8959	45929522
solcap_snp_c2_40831	45.0619	45944363
solcap_snp_c1_12028	45.062	45944624
solcap_snp_c1_12027	45.0621	45944648
solcap_snp_c1_12024	45.0622	45944735
solcap_snp_c2_40822	45.0623	45945875
solcap_snp_c2_55861	46.9561	46117955
solcap_snp_c2_41396	47.456	46406260
solcap_snp_c2_41395	47.5699	46413142
solcap_snp_c2_40766	48.8907	47108452
solcap_snp_c2_40763	48.8908	47109426
solcap_snp_c2_40762	48.8909	47116416
PotVar0132240	49.5997	47156203
solcap_snp_c1_11991	51.3239	47398435
solcap_snp_c1_16001	52.0157	47539878
solcap_snp_c2_45603	53.2161	48073593
solcap_snp_c2_45602	53.2162	48073693
solcap_snp_c1_13524	53.2163	48074905
solcap_snp_c2_57635	53.3974	48101951
solcap_snp_c2_45600	53.5805	48130882
solcap_snp_c1_13530	53.76	48149399
solcap_snp_c2_45616	54.0601	48165825
solcap_snp_c2_45611	54.6514	48203431
solcap_snp_c2_45606	54.6515	48218826
solcap_snp_c2_25532	55.1729	48591792
solcap_snp_c2_25530	55.173	48593576
solcap_snp_c2_25529	55.1731	48593621
solcap_snp_c2_25528	55.1732	48616808
solcap_snp_c2_25527	55.1733	48616993
solcap_snp_c2_25526	55.2545	48617149
solcap_snp_c2_25523	55.2546	48617343
solcap_snp_c2_25522	55.2547	48617457
PotVar0111683	55.7739	48721779
PotVar0111687	56.4092	48721966
solcap_snp_c1_16351	56.9243	48761642
solcap_snp_c2_25469	56.9244	48808653
solcap_snp_c1_8021	56.9245	48862950
solcap_snp_c1_8020	56.9694	48863048
solcap_snp_c1_8018	57.2503	48863220
solcap_snp_c2_57640	57.8922	49179309
solcap_snp_c1_11540	58.9866	49659510
solcap_snp_c1_11539	59.1543	49659555
solcap_snp_c2_27806	61.1164	50615253
solcap_snp_c2_27808	61.1165	50615474
solcap_snp_c2_27821	62.0687	50649574
solcap_snp_c2_27827	62.3443	50697563
solcap_snp_c2_27831	63.2374	50806407
solcap_snp_c2_31395	63.6443	51124055
solcap_snp_c2_45693	65.1681	51357092
solcap_snp_c2_45692	66.3808	51357104
solcap_snp_c2_45686	66.3809	51360322
solcap_snp_c2_51301	66.5655	51725970
PotVar0134467	66.5656	51903954
solcap_snp_c2_53951	66.5657	51904076
solcap_snp_c2_53950	66.5658	51904140
solcap_snp_c2_53949	66.5659	51904174
PotVar0134570	66.566	51905362
PotVar0134629	66.6142	51908011
PotVar0134650	66.8867	51909193
solcap_snp_c2_53948	66.8868	51909193
PotVar0134670	66.8869	51909507
solcap_snp_c2_53946	66.887	51926832
solcap_snp_c2_53945	67.1501	51927288
solcap_snp_c2_53944	67.1502	51927510
solcap_snp_c2_51083	67.3339	52002272
solcap_snp_c1_15219	67.3954	52167709
solcap_snp_c1_15218	67.9821	52262224
solcap_snp_c2_51214	68.2659	52644357
solcap_snp_c2_51215	68.266	52656103
solcap_snp_c1_14992	68.2661	52663730
solcap_snp_c2_51202	68.3916	52681270
solcap_snp_c1_10297	70.3836	53166656
solcap_snp_c2_34274	70.443	53167969
solcap_snp_c2_55819	70.5879	53235977
solcap_snp_c1_10305	70.588	53339884
PotVar0004484	70.5881	53357201
PotVar0004494	71.0091	53357520
solcap_snp_c1_11319	71.0111	53648500
PotVar0004666	71.14	53707878
PotVar0004680	71.1401	53708356
solcap_snp_c2_37901	71.1402	53771612
solcap_snp_c2_24755	71.8837	53968692
solcap_snp_c2_24686	72.6555	54025405
solcap_snp_c2_51728	72.6556	54072104
solcap_snp_c2_51744	72.8061	54076001
solcap_snp_c1_15128	73.1573	54092271
solcap_snp_c1_15125	73.1574	54124324
solcap_snp_c2_51735	73.3398	54125225
solcap_snp_c2_51738	73.3399	54166244
solcap_snp_c2_34401	73.7686	54281042
solcap_snp_c2_34325	73.7687	54305632
solcap_snp_c2_34329	73.7688	54318526
solcap_snp_c2_34332	74.2306	54368567
solcap_snp_c2_34335	74.2307	54383063
solcap_snp_c1_10322	74.2308	54383775
solcap_snp_c1_10324	74.2309	54389816
solcap_snp_c1_10325	74.3646	54390313
solcap_snp_c2_34342	74.3647	54392438
solcap_snp_c2_34352	74.3648	54457671
solcap_snp_c2_34356	74.3649	54474439
solcap_snp_c2_34366	74.365	54498423
solcap_snp_c2_54993	79.7589	54747060
solcap_snp_c2_54992	82.0374	54747212
solcap_snp_c2_15560	82.0375	54835157
PotVar0004719	82.0376	54876067
PotVar0004789	82.0377	54877652
PotVar0004792	82.0378	54877716
PotVar0004795	82.0379	54877874
solcap_snp_c2_15481	82.0427	54990342
solcap_snp_c2_15483	82.3506	54996383
solcap_snp_c1_4990	83.308	55066508
solcap_snp_c2_15493	83.3081	55084724
solcap_snp_c1_5001	83.3082	55159936
solcap_snp_c2_15505	83.6277	55178875
solcap_snp_c2_15509	83.6278	55209087
solcap_snp_c2_15512	83.6279	55209236
solcap_snp_c1_5010	83.628	55210592
solcap_snp_c2_15521	84.3213	55273994
solcap_snp_c2_15528	84.3214	55287524
solcap_snp_c2_15529	84.3215	55287582
solcap_snp_c2_15533	84.3216	55288428
solcap_snp_c2_15535	84.3217	55288566
PotVar0004858	84.4911	55309361
PotVar0004860	84.6686	55309392
solcap_snp_c2_15544	84.6687	55313876
PotVar0004885	84.9095	55326008
PotVar0004947	85.1998	55327067
PotVar0004952	85.1999	55327244
solcap_snp_c2_15550	85.2	55335587
solcap_snp_c2_15555	85.8843	55394925
solcap_snp_c1_5021	85.8844	55399364
solcap_snp_c2_15577	86.5143	55503488
solcap_snp_c1_5041	86.5144	55514505
solcap_snp_c2_57077	86.5145	55550196
solcap_snp_c2_57076	86.5146	55553368
solcap_snp_c2_57075	86.5147	55553722
solcap_snp_c2_57078	86.5148	55558358
solcap_snp_c2_15585	86.5149	55576956
solcap_snp_c2_15590	86.8381	55585442
solcap_snp_c1_5044	86.8382	55588116
solcap_snp_c2_15592	86.8383	55592007
solcap_snp_c2_15595	86.8384	55597964
solcap_snp_c2_15596	86.8385	55599626
solcap_snp_c2_15603	86.8386	55609609
solcap_snp_c2_15605	86.8387	55612755
solcap_snp_c1_5047	86.8388	55613000
solcap_snp_c2_15606	86.8389	55613286
solcap_snp_c2_15607	86.839	55670606
solcap_snp_c2_15616	86.8391	55726339
solcap_snp_c2_15622	86.8392	55727260
solcap_snp_c2_15641	87.7545	55748465
solcap_snp_c2_15642	87.7546	55748590
solcap_snp_c2_15648	88.7559	55764678
solcap_snp_c2_15654	88.756	55797725
PotVar0005016	88.7561	55841256
PotVar0005020	88.7562	55841315
solcap_snp_c2_48125	88.7563	55841755
solcap_snp_c2_48124	88.7564	55841759
solcap_snp_c2_48123	88.7565	55841834
solcap_snp_c2_48122	88.7566	55841848
PotVar0005097	88.7567	55842116
solcap_snp_c2_48119	90.0078	55842163
PotVar0005102	90.0464	55842205
PotVar0005103	90.0465	55842215
solcap_snp_c2_48118	90.0466	55842215
PotVar0005149	90.0467	55842579
PotVar0005213	91.2717	55854933
PotVar0005291	91.2756	55855985
solcap_snp_c2_48112	91.2937	55865190
solcap_snp_c2_48107	93.0039	55891224
solcap_snp_c2_48091	93.004	55898404
solcap_snp_c1_14222	93.4697	55899740
solcap_snp_c2_48087	95.2103	55904334
solcap_snp_c2_48146	95.2104	55919092
solcap_snp_c2_48144	95.2105	55923410
solcap_snp_c2_48138	95.2106	55938867
solcap_snp_c2_48133	95.2107	55939278
solcap_snp_c1_14236	95.2108	55946697
solcap_snp_c2_48130	95.2109	55946835
solcap_snp_c1_14232	97.4289	55950012
solcap_snp_c2_48128	97.429	55968047
solcap_snp_c2_48126	99.4167	55968638
solcap_snp_c2_48117	99.4168	55998674
solcap_snp_c2_48098	99.4169	56003029
solcap_snp_c2_48092	99.417	56003386
solcap_snp_c2_29799	99.4171	56091043
solcap_snp_c2_29805	99.4583	56110093
solcap_snp_c1_9027	103.052	56116729
solcap_snp_c1_9031	103.265	56137646
solcap_snp_c2_29705	103.265	56141327
solcap_snp_c2_29719	103.391	56170670
solcap_snp_c2_29720	103.392	56171790
solcap_snp_c1_9056	103.456	56194480
solcap_snp_c2_29732	103.456	56245114
solcap_snp_c1_9058	103.865	56301672
solcap_snp_c2_29739	103.866	56303368
solcap_snp_c1_9060	103.866	56310959
solcap_snp_c2_29741	103.866	56311171
solcap_snp_c2_29742	103.866	56311650
solcap_snp_c2_29743	103.866	56319774
solcap_snp_c2_29744	103.866	56321357
solcap_snp_c2_29745	103.866	56321366
solcap_snp_c2_29749	103.866	56366011
solcap_snp_c2_29752	103.866	56370987
solcap_snp_c2_29767	103.866	56448463
solcap_snp_c2_29769	104.18	56459643
solcap_snp_c2_29775	104.486	56494593
solcap_snp_c2_29780	104.486	56501225
solcap_snp_c2_29783	104.486	56514654
solcap_snp_c2_29786	104.486	56533774
solcap_snp_c2_29787	104.486	56553693
solcap_snp_c2_29788	104.486	56555886
PotVar0005449	104.486	56582912
PotVar0005549	104.487	56584106
PotVar0005590	104.487	56584744
solcap_snp_c2_42940	104.849	56590189
solcap_snp_c2_42928	104.849	56673770
solcap_snp_c1_12656	104.849	56677034
solcap_snp_c2_42925	104.85	56681757
solcap_snp_c1_12655	104.85	56683791
solcap_snp_c1_12654	104.85	56684694
solcap_snp_c2_42921	104.85	56700426
solcap_snp_c1_12647	104.85	56701747
solcap_snp_c1_12644	104.85	56723338
solcap_snp_c2_42904	105.145	56731237
solcap_snp_c1_12619	105.273	56753834
solcap_snp_c2_42951	105.273	56783266
solcap_snp_c1_12671	105.273	56797956
solcap_snp_c2_44196	105.273	56810840
solcap_snp_c1_13003	105.406	56820856
solcap_snp_c2_44194	105.406	56823484
solcap_snp_c2_44193	105.407	56828920
solcap_snp_c1_12999	105.407	56830105
solcap_snp_c2_44177	105.407	56846684
solcap_snp_c1_12991	105.407	56849954
PotVar0005603	105.407	56858197
PotVar0005610	105.425	56858365
PotVar0005644	105.426	56860555
PotVar0005662	105.426	56860960
PotVar0005666	105.647	56861020
PotVar0005672	105.647	56861272
PotVar0005683	105.716	56861518
PotVar0005707	105.952	56861831
solcap_snp_c1_12989	106.572	56879175
solcap_snp_c1_12987	106.573	56886122
solcap_snp_c2_44154	106.573	56952965
solcap_snp_c2_44153	106.573	56953207
solcap_snp_c2_44152	106.573	56965186
solcap_snp_c2_44150	106.573	56965837
solcap_snp_c2_44145	106.573	56976829
solcap_snp_c2_44143	106.573	56977040
solcap_snp_c2_44207	106.573	57002127
solcap_snp_c2_44205	106.573	57004436
solcap_snp_c2_44198	106.7	57048740
solcap_snp_c2_22725	106.7	57226540
solcap_snp_c1_7150	106.7	57265227
solcap_snp_c1_7151	106.748	57267722
solcap_snp_c2_22558	106.748	57282263
solcap_snp_c2_22559	106.749	57285840
solcap_snp_c1_7161	107.007	57305350
solcap_snp_c1_7165	107.007	57307068
solcap_snp_c2_22563	107.007	57313121
solcap_snp_c2_22564	107.007	57313190
solcap_snp_c2_22566	107.007	57327746
solcap_snp_c2_22576	107.007	57334169
solcap_snp_c2_22582	107.007	57336064
solcap_snp_c2_22585	107.008	57363205
solcap_snp_c2_22588	107.299	57368730
solcap_snp_c1_7183	107.299	57431245
solcap_snp_c2_22591	107.299	57431873
solcap_snp_c2_22594	107.299	57439946
solcap_snp_c1_7187	107.299	57468777
solcap_snp_c1_7189	107.299	57470207
PotVar0058273	107.595	57478874
solcap_snp_c1_7190	107.595	57478874
PotVar0058242	107.785	57479511
PotVar0058237	107.785	57479655
solcap_snp_c1_7192	107.785	57479655
PotVar0058234	107.785	57479715
solcap_snp_c1_7199	108.259	57515902
solcap_snp_c2_22611	108.264	57520832
solcap_snp_c1_7201	108.264	57526808
solcap_snp_c2_22612	108.264	57539745
solcap_snp_c2_22613	108.264	57539859
solcap_snp_c2_22624	108.39	57557609
solcap_snp_c2_22626	108.39	57557851
solcap_snp_c1_7208	108.391	57577283
solcap_snp_c2_22630	108.391	57577812
solcap_snp_c2_22642	108.546	57592912
solcap_snp_c2_22645	108.546	57595404
solcap_snp_c1_7212	108.546	57596618
solcap_snp_c2_22649	108.546	57602613
solcap_snp_c2_22662	109.374	57644499
solcap_snp_c2_22664	109.374	57645752
PotVar0058165	109.374	57670512
PotVar0058153	109.374	57670719
PotVar0058146	109.374	57670931
PotVar0058145	109.486	57670985
PotVar0058123	109.486	57671387
solcap_snp_c2_22697	109.486	57698776
solcap_snp_c2_22699	109.486	57698893
solcap_snp_c2_22703	110.023	57704138
solcap_snp_c1_7227	110.023	57709979
solcap_snp_c2_22733	110.023	57808892
solcap_snp_c2_22736	110.306	57816292
solcap_snp_c2_22741	110.306	57823346
solcap_snp_c2_22743	110.306	57823446
solcap_snp_c2_22744	110.306	57837250
PotVar0058094	110.306	57893644
PotVar0057984	110.306	57895786
PotVar0057955	110.307	57896209
PotVar0057954	110.367	57896274
solcap_snp_c2_48968	110.54	57937845
solcap_snp_c1_14476	110.54	57943558
solcap_snp_c2_48989	110.54	57966951
solcap_snp_c1_14480	110.54	57969199
solcap_snp_c2_49001	110.54	57993352
solcap_snp_c2_49008	110.706	57998589
solcap_snp_c2_49010	111.018	57999034
solcap_snp_c2_49014	111.018	58003903
solcap_snp_c2_49017	111.386	58007367
solcap_snp_c2_49026	111.386	58021282
solcap_snp_c1_14468	111.386	58030171
solcap_snp_c2_48963	111.386	58031966
solcap_snp_c2_48964	111.608	58038788
solcap_snp_c2_48978	111.608	58057750
PotVar0057905	111.842	58078374
PotVar0057871	111.842	58078869
PotVar0057846	111.843	58080396
PotVar0057840	111.843	58080515
solcap_snp_c1_14475	111.843	58081119
solcap_snp_c2_54440	111.843	58121790
PotVar0057806	112.213	58184811
PotVar0057722	112.213	58185506
solcap_snp_c2_54437	112.728	58187478
solcap_snp_c2_55747	112.728	58201039
solcap_snp_c2_55737	112.728	58240938
solcap_snp_c2_45272	112.982	58262313
solcap_snp_c2_45269	112.983	58262758
PotVar0057678	112.983	58294041
PotVar0057644	112.983	58294914
PotVar0057613	113.133	58295508
PotVar0057605	113.134	58295670
solcap_snp_c2_45256	113.383	58295890
solcap_snp_c2_45251	113.383	58301553
PotVar0057515	113.383	58303298
PotVar0057514	113.383	58303304
PotVar0057500	113.383	58303619
solcap_snp_c2_45239	113.383	58305601
solcap_snp_c1_13420	113.819	58386883
solcap_snp_c1_13417	114.095	58431211
solcap_snp_c1_13410	114.095	58436630
solcap_snp_c1_8814	114.521	58485780
solcap_snp_c2_28786	114.521	58493038
solcap_snp_c1_8809	114.521	58561597
solcap_snp_c1_8806	114.521	58567056
solcap_snp_c2_28778	114.521	58583571
solcap_snp_c2_28771	114.521	58597146
solcap_snp_c2_28770	114.854	58606753
PotVar0057438	114.854	58609322
PotVar0057431	114.976	58609454
PotVar0057420	115.337	58609643
PotVar0057386	116.117	58610314
solcap_snp_c2_28768	116.117	58620175
solcap_snp_c2_28764	116.117	58631929
solcap_snp_c2_28761	116.117	58636715
solcap_snp_c2_28756	116.478	58644426
solcap_snp_c2_28749	116.478	58651150
solcap_snp_c2_28728	117.307	58832053
solcap_snp_c2_28727	117.307	58832128
solcap_snp_c2_28726	117.353	58834747
solcap_snp_c2_28725	117.353	58835264
solcap_snp_c2_28697	117.886	58885773
solcap_snp_c2_28666	117.886	58929210
solcap_snp_c2_28665	117.886	58929821
solcap_snp_c2_28789	119.658	58981028
solcap_snp_c2_28656	119.658	59058248
solcap_snp_c2_41765	119.658	59124920
solcap_snp_c2_41768	119.935	59125021
solcap_snp_c2_41769	119.935	59125072
solcap_snp_c2_41778	120.082	59148176
solcap_snp_c2_41780	120.241	59151626
solcap_snp_c2_41693	120.241	59177759
solcap_snp_c1_12220	120.241	59236087
solcap_snp_c1_12224	120.241	59253236
solcap_snp_c1_12225	120.241	59253376
solcap_snp_c1_12229	120.241	59261401
solcap_snp_c2_41719	120.241	59278779
solcap_snp_c2_41725	120.817	59403328
solcap_snp_c1_12234	120.97	59403404
solcap_snp_c1_12236	121.352	59445183
solcap_snp_c2_41744	121.668	59457671
PotVar0122866	121.668	59470618
PotVar0122857	121.668	59470824
PotVar0122838	121.762	59471072
PotVar0122828	121.762	59471277
solcap_snp_c1_13268	121.762	59520440
solcap_snp_c2_45013	121.762	59556107
PotVar0122789	121.762	59562120
PotVar0122784	121.762	59562310
PotVar0122771	121.822	59562584
PotVar0122769	121.912	59562658
solcap_snp_c2_45011	121.912	59562658
PotVar0122768	122.223	59562680
solcap_snp_c2_45003	122.888	59602601
solcap_snp_c1_13243	122.888	59608971
solcap_snp_c2_45023	123.146	59663750
PotVar0122698	123.146	59671482
PotVar0122635	123.146	59675124

[truncated: 2 more sheets: chr11, chr12]
